# Supplementary material
Source: publisher site journal article supplement (https://www.dovepress.com/article/404113)
Supplement: Supplementary file 1 [file get_supplementary_file.php]

**SUPPLEMENTARY FILE**

**Comparative efficacy and safety of multiple wake-promoting agents for the treatment of excessive daytime sleepiness in narcolepsy: a network meta-analysis**

Shuqin Zhan, MD, PhD1*; Hui Ye, MS2; Ning Li, BS1; Yimeng Zhang, MS1; Yueyang Cheng, BS1; Yuanqing Wang, MS1,3; Shimin Hu, PhD1; Yue Hou, MD1

**Affiliation:**

**Affiliation:**

1Department of Neurology, Xuanwu Hospital, Capital Medical University, Beijing, China,100053

2Ignis Therapeutics (Shanghai) Limited, China 200000

3Department of Neurology, People’s Hospital of Rizhao, Rizhao, China, 276800

**CORRESPONDENCE INFORMATION**

Professor Shuqin Zhan, MD., PhD,

Department of Neurology, Xuanwu Hospital,

Capital Medical University/100053, China;

Tel: +8613801027285;

Email: [shqzhan@hotmail.com](mailto:shqzhan@hotmail.com)

**Table S1: Baseline characteristics of the studies included**

| **Study** | **Trial ID/Name** | **Design** | **Intervention**  **(dose)** | **Trial arms** | **Total subjects** | **Mean age in years (SD)** | **Mean BMI in kg/m2 (SD)** | **Baseline MWT in minutes (SD)** | **Baseline ESS score (SD)** |
| --- | --- | --- | --- | --- | --- | --- | --- | --- | --- |
| 1Harsh et al,  2006 | NA | DB-RCT  3 parallel  groups | Armodafinil  (150 mg and 250 mg) | Placebo | 64 | 39.2 (12.0) | 28.3 (5.3) | 0900-1500: 12.5 (6.6)  1500–1900: 12.9 (6.6) | 17.5 (3.9) |
| Armodafinil (150 mg) | 65 | 40.4 (12.5) | 29.6 (6.7) | 0900-1500: 12.1 (6.6)  1500–1900: 12.2 (6.8) | 17.3 (3.4) |
| Armodafinil (250 mg) | 67 | 35.0 (12.5) | 28.3 (6.9) | 0900-1500: 9.5 (6.1)  1500–1900: 10.5 (6.6) | 15.7 (4.7) |
| 2Broughton et al, 1997 | NA | DB-crossover RCT | Modafinil  (200 and 400 mg) | Placebo | 75 | 43(16) | NA | 3.5(2.5) | 16.3(4.4) |
| Modafinil 200mg | 3.5(2.5) | 16.6(4.8) |
| Modafinil 400mg | 3.5(2.5) |  |
| 3US MDF  1998 | NA | DB-RCT-parallel | Modafinil  (200 and 400 mg) | Placebo | 92 | 42 (18-68) | NA | 5.8(4.7) | 18.3(3.3) |
| Modafinil 200 mg | 96 | 40 (18-67) | 5.8(5.0) | 17.9(3.8) |
| Modafinil 400 mg | 95 | 44 (19-67) | 6.6(5.2) | 17.1(4.2) |
| 4US MDF  2000 | NA | DB-RCT-parallel | Modafinil  (200 and 400 mg) | Placebo | 93 | 41 (17-66) | NA | 6.0(5.0) | 17.6(4.0) |
| Modafinil 200mg | 89 | 42 (18-67) | 6.1 (4.9) | 17.4(3.8) |
| Modafinil 400mg | 89 | 42 (18-66) | 5.9(4.4) | 18.0(3.4) |
| 5Billiard et al, 1994 | NA | DB-crossover study | Modafinil  300 mg | Placebo | 50 | 40.88(13.27) | NA | NA | NA |
| Modafinil 300mg |
| 6Saletu et al, 2009 | NA | DB-RCT | Modafinil  (200 mg-week1, 300mg-week 2  400 mg-week3) | Placebo | 15 | 38 ± 18 | NA | NA | 17.3 (4.0) |
| 7Moldofsky et al, 2000 | NA | DB-placebo controlled  16-week Open label  2 weeks DB | Modafinil-300-500 mg | Placebo | 33 | 45 (16) | NA | 10.7(8.9) | 16.3(4.4) |
| Modafinil | 30 | 11.7(11.4) | 16.6(4.8) |
| 8Black et al, 2006 | NA | DB-RCT | Modafinil-200-600 mg  Sodium oxybate  6-9g | Placebo | 55 | 41.0 (13.4) | NA | 9.74(6.57) | 16 |
| Sodium oxybate | 50 | 35.1 (12.9) | 11.29(6.4) | 15 |
| Modafinil | 63 | 38.9 (15.6) | 10.48(6.0) | 14 |
| 9The U.S. Sodium oxybate  Multicenter Study Group,  2002 | NA | DB-RCT | Sodium oxybate  (3, 6, or 9 g) | Placebo | 136 | 43.1 | NA | NA | NA |
| 10Xyrem International  Study Group,  2005 | NA | DB-RCT | Sodium oxybate  (4.5 g, 6 g, or 9 g) | Placebo | 59 | 40.5 (16-75) | NA | 9.50 (59) | 17.5 (58) |
| 4.5g Sodium oxybate | 64 | 8.53 (62) | 18.0 (61) |
| 6g | 58 | 9.00 (57) | 19.0 (58) |
| 9g | 47 | 7.63 (47) | 19.0 (47) |
| 11Szakacs et al, 2017 | NTC01800045  (Harmony CTP) | DB-RCT | Pitolisant  (40 mg) | Placebo | 52 | 39 (18-66) | 28.8(6.0) | 4.7 (4.5) | 17.1 (3.4) |
| Pitolisant  40 mg | 54 | 34 (18-64) | 27.2(5.2) | 4.2 (3.2) | 17.3 (3.3) |
| 12Dauvilliers et al, 2013 | NCT01067222 (Harmony1) | DB RCT | Pitolisant  (40 mg)  Modafinil  (400 mg) | Placebo | 30 | 39.5 (30­52) | 28.2(6.0) | 8.4(1.8) | 18.9(2.5) |
| Pitolisant | 32 | 33.0 (21-49) | 30.4(8.3) | 7.4(2.3) | 17.8(2.5) |
| Modafinil | 33 | 40.0 (25-48) | 27.7(5.3) | 8.8(2.5) | 18.5(2.7) |
| 13Kollb-Sielecka et al, 2017 | NCT01638403  Harmony  (I BIS) | DB-RCT | Pitolisant  20 mg  Modafinil  400 mg | Placebo | 33 | 40 | NA | NA | 18.2 (2.3) |
| Pitolisant | 67 | 18.3 (2.4) |
| Modafinil | 66 | 18.1 (2.8) |
| 14Thorpy et al,  2018 | NCT02348593  EudraCT number 2014-005487-15 | DB RCT | Solriamfetol  (75 or 150 or 300 mg) | Placebo | 58 | 36 (15.2) | 29.1 (6.0) | 6.1 (5.6) | 17.3 (2.8) |
| Solriamfetol 75 mg | 59 | 36.5 (12.8) | 27.9 (5.4) | 7.5 (5.4) | 17.3 (3.5) |
| Solriamfetol 150 mg | 55 | 38.1 (13.0) | 27.9 (5.8) | 7.7 (5.6) | 16.9 (3.7) |
| Solriamfetol 300 mg | 59 | 34.3 (11.5) | 28.1 (6.3) | 8.7 (6.2) | 17.2 (2.8) |
| 15Ruoff et al,  2016 | NCT01681121 | DB-RCT-parallel | Solriamfetol  150 mg/day (weeks 1–4); 300 mg/day (weeks 5–12) | Placebo | 49 | 36.7 (11.7) | 26.4 (4.4) | 5.7 (2.8) | 17.4 (2.9) |
| Solriamfetol | 44 | 41.0 (12.3) | 26.8 (4.5) | 5.7 (5.9) | 17.3 (3.7) |
| 16Bogan et al,  2015 | NCT01485770 | DB cross over study | Solriamfetol  150 mg-week 1 and 3  300 mg-week 2 and 4) | Placebo | 33 | 37.1 (12.4) | 26.9 (3.6) | 5.2 (3.1) | 17.6 (3.5) |
| Solriamfetol | 33 |
| Solriamfetol | 140 | 50.2 (13.2) | 31.9 (5.7) |
| 17Bogan et al,  2021 | NCT03030599 | DB-RW | Lower-Sodium oxybate | Placebo | 67 | 37.8 (12.69) | 30.0 (6.0) | NA | Median [Q1, Q3]  (13.0 [9.0, 17.0] |
| Lower-sodium oxybate | 69 | 37.2 (11.79) | 27.3 (5.0) | 14.0 [10.0, 19.0] |
| Abbreviations: BMI, body mass index: DB, double blind; ESS, Epworth Sleepiness Scale; MWT, Maintenance of Wakefulness Test; RCT, randomized controlled trial; RW, randomized withdrawal | | | | | | | | | |

[[1]](#footnote-2)

**Table S2: Comparison of studied endpoints among treatments**

| **Study** | **Plb** | **MDF** | **SXB** | **Pitolisant** | **Solriamfetol** | **LXB** | **ESS** | **MWT-20** | **MWT-40** | **CGI** | **PGI** | **AE** | **SAE** | **AEs leading to discontinuation** | **All cause discontinuation** |
| --- | --- | --- | --- | --- | --- | --- | --- | --- | --- | --- | --- | --- | --- | --- | --- |
| 1Harsh et al, 2006 | **a** | **a** |  |  |  |  | **a** | **a** |  | **a** |  | **a** | **a** | **a** | **a** |
| 2Broughton et al, 1997 | **a** | **a** |  |  |  |  | **a** |  | **a** |  |  |  | **a** | **a** | **a** |
| 3US MDF 1998 | **a** | **a** |  |  |  |  | **a** | **a** |  | **a** |  | **a** |  | **a** | **a** |
| 4US MDF 2000 | **a** | **a** |  |  |  |  | **a** | **a** |  | **a** |  | **a** |  | **a** | **a** |
| 5Billiard et al, 1994 | **a** | **a** |  |  |  |  |  | **a** |  |  |  |  |  |  |  |
| 6Saletu et al, 2009 | **a** | **a** |  |  |  |  | **a** | **a** |  |  |  |  |  |  |  |
| 7Moldofsky et al, 2000 | **a** | **a** |  |  |  |  | **a** |  | **a** |  |  | **a** |  |  | **a** |
| 8Black et al, 2006 | **a** | **a** | **a** |  |  |  | **a** | **a** |  | **a** |  | **a** |  | **a** | **a** |
| 9The U.S. Sodium oxybate  Multicenter Study Group. 2002 | **a** |  | **a** |  |  |  | **a** |  |  | **a** |  | **a** | **a** |  |  |
| 10Xyrem International study group 2005 | **a** |  | **a** |  |  |  |  |  |  | **a** |  |  | **a** | **a** | **a** |
| 11Szakacs et al, 2017 | **a** |  |  | **a** |  |  | **a** |  | **a** | **a** |  | **a** | **a** | **a** | **a** |
| 12Dauvilliers et al, 2013 | **a** | **a** |  | **a** |  |  | **a** |  | **a** |  |  | **a** | **a** | **a** | **a** |
| 13Kollb-Sielecka et al, 2017 | **a** | **a** |  | **a** |  |  | **a** |  | **a** |  |  |  |  |  |  |
| 14Thorpy et al, 2018 | **a** |  |  |  | **a** |  | **a** |  | **a** | **a** | **a** | **a** | **a** | **a** | **a** |
| 15Ruoff et al, 2016 | **a** |  |  |  | **a** |  | **a** |  | **a** | **a** | **a** | **a** | **a** | **a** | **a** |
| 16Bogan et al, 2015 | **a** |  |  |  | **a** |  | **a** |  | **a** | **a** |  | **a** | **a** | **a** | **a** |
| 17Bogan et al, 2021 | **a** |  |  |  |  | **a** | **a** |  |  | **a** | **a** | **a** | **a** | **a** | **a** |
| **Abbreviations:** AE, adverse event; CGI-C, Clinical Global Impression of Change; ESS, Epworth Sleepiness Scale; LXB, Lower sodium oxybate; MDF, modafinil; MWT, Maintenance of Wakefulness Test; Plb, placebo; PGI-C, Patients' Global Impression of Change; SXB, Sodium oxybate; SAE, serious adverse event | | | | | | | | | | | | | | | |

[[2]](#footnote-3)

**Table S3: Pairwise comparison of mean difference of treatments for MWT-20 min outcome**

| Modafinil | 3.35 (2.31, 4.38) | -1.94 (-4.81, 0.93) |
| --- | --- | --- |
| -3.35 (-4.38, -2.31) | Placebo | -5.29 (-8.17, -2.41) |
| 1.94 (-0.93, 4.81) | 5.29 (2.41, 8.17) | Sodium oxybate |

**Table S4: Pairwise comparison of mean difference of treatments for MWT-40 min outcome**

| Modafinil | 0.68 (-0.78, 2.13) | 3.57 (2.03, 5.12) | -5.54 (-8.10, -2.97) |
| --- | --- | --- | --- |
| -0.68 (-2.13 ,0.78) | Pitolisant | 2.90 (1.38, 4.41) | -6.21 (-8.76, -3.66) |
| -3.57 (-5.12, -2.03) | -2.90 (-4.41, -1.38) | Placebo | -9.11 (-11.16, -7.05) |
| 5.54 (2.97, 8.10) | 6.21 (3.66, 8.76) | 9.11 (7.05, 11.16) | Solriamfetol |

**Table S5: P-scores for efficacy outcomes**

| **Outcomes** | **Placebo** | **Modafinil** | **Sodium oxybate** | **Pitolisant** | **Solriamfetol** | **Lower sodium oxybate** |
| --- | --- | --- | --- | --- | --- | --- |
| MWT-20 min | 0 | 0.5248 | 0.9752 | NA | NA | NA |
| MWT-40 min | 0 | 0.6063 | NA | 0.3937 | 1 | NA |
| MWT overall | 0 | 0.4761 | 0.7303 | 0.2961 | 0.9974 | NA |
| ESS | 0 | 0.5291 | 0.6082 | 0.3621 | 0.9268 | 0.5658 |
| CGI-C | 0.0001 | 0.2481 | 0.5782 | 0.508 | 0.7703 | 0.8953 |
| PGI-C | 0.0341 | NA | NA | NA | 0.8714 | 0.6274 |
| Abbreviations: CGI-C, Clinical Global Impression of Change; ESS, Epworth Sleepiness Scale; MWT, Maintenance of Wakefulness Test; PGI-C, Patients' Global Impression of Change | | | | | | |

**Table S6: P-scores for safety outcomes**

| **Outcomes** | **Placebo** | **Modafinil** | **Sodium oxybate** | **Pitolisant** | **Solriamfetol** | **Lower sodium oxybate** |
| --- | --- | --- | --- | --- | --- | --- |
| Overall AE | 0.7714 | 0.265 | 0.2037 | 0.4329 | 0.386 | 0.9409 |
| Serious AE | 0.6554 | 0.0538 | 0.7353 | 0.3653 | 0.2438 | 0.9465 |
| AE leading to discontinuation | 0.7737 | 0.3769 | 0.0297 | 0.4807 | 0.3749 | 0.9641 |
| All-cause discontinuation | 0.5294 | 0.3312 | 0.003 | 0.7071 | 0.4402 | 0.9891 |
| Headache | 0.7642 | 0.5269 | 0.9042 | 0.3357 | 0.143 | 0.326 |
| Dizziness | 0.6916 | 0.365 | 0.1067 | 0.8803 | 0.4564 | NA |
| Insomnia | 0.8445 | 0.7188 | NA | 0.2115 | 0.3785 | 0.3467 |
| Irritability | 0.8954 | 0.309 | NA | 0.478 | 0.3227 | NA |
| Nausea | 0.9659 | 0.5373 | 0.0604 | 0.555 | 0.3815 | NA |
| Dry mouth | 0.6807 | 0.2693 | 0.7492 | NA | 0.3008 | NA |
| Abbreviations: AE, adverse event | | | | | | |

**Table S7**. **Comparison of exploratory AEs of interest**

| 1. **Central nervous events: Dizziness and Headache** | | | | | |
| --- | --- | --- | --- | --- | --- |
| Lower-sodium oxybate | NA | NA | NA | NA | NA |
| 0.43 (0.02, 10.25) | Modafinil | 3.46 (0.72, 16.67) | 1.77 (0.53, 5.95) | 0.57 (0.15, 2.16) | 1.17 (0.20, 6.93) |
| 0.59 (0.02, 15.04) | 1.39 (0.77, 2.57) | Pitolisant | 0.51 (0.09, 2.89) | 0.16 (0.03, 1.07) | 0.34 (0.04, 2.95) |
| 0.35 (0.015, 8.53) | 0.84 (0.69, 1.01) | 0.6.00 (0.33, 1.09) | Placebo | 0.32 (0.12, 0.84) | 0.69 (0.18, 2.42) |
| 0.26 (0.01, 6.72) | 0.62 (0.34, 1.16) | 0.45 (0.19, 1.042) | 0.75 (0.41, 1.35) | Sodium oxybate | 2.09 (0.42, 10.46) |
| 0.94 (0.04, 24.86) | **2.23 (1.03, 4.86)** | 1.60 (0.61, 4.21) | **2.67 (1.26, 5.67)** | **3.58 (1.37, 9.36)** | Solriamfetol |
| 1. **Central nervous events: Irritability and Insomnia** | | | | | |
| Lower-sodium oxybate | NA | NA | NA | NA | NA |
| 0.27 (0.01, 9.91) | Modafinil | 1.57 (0.24, 10.12) | 4.50 (0.46, 43.62) | 1.01 (0.04, 23.10) | NA |
| 1.49 (0.03, 71.52) | 5.45 (0.48, 61.71) | Pitolisant | 2.86 (0.46, 17.68) | 0.64 (0.04, 10.77) | NA |
| 0.21 (0.01, 4.34) | 0.78 (0.11, 5.45) | 0.14 (0.01, 1.61) | Placebo | 0.22 (0.03, 1.93) | NA |
| 0.69 (0.03, 16.45) | 2.54 (0.29, 22.25) | 0.47 (0.03, 6.32) | **3.27 (1.25, 8.52)** | Solriamfetol | NA |
| 1. **Gastrointestinal events: Dry mouth and Nausea** | | | | | |
| Modafinil | NA | 2.40 (0.42, 13.80) | 4.31 (0.19, 95.89) | 1.10 (0.11, 10.80) | NA |
| 0.93 (0.19, 4.56) | Pitolisant | NA | **NA** | NA | NA |
| 0.39 (0.19, 0.76) | 0.41 (0.09, 1.86) | Placebo | 1.80 (0.08, 40.00) | 0.46 (0.11, 1.99) | NA |
| **3.06 (1.11, 8.41)** | 3.25 (0.56, 18.87) | **7.85 (3.01, 20.45)** | Sodium oxybate | 0.26 (0.008, 7.92) | NA |
| 1.37 (0.40, 4.69) | 1.46 (0.23, 9.02) | **3.52 (1.26, 9.87)** | 0.45 (0.11, 1.83) | Solriamfetol | NA |
| Significant results are in bold; effect sizes represent risk ratios and 95% confidence interval. For safety measures, relative risk lesser than 1 favor the column-defining treatment  NA, not applicable | | | | | |
| **Headache, Insomnia and Nausea**  **Dizziness, Irritability and Dry mouth** | | | | | |

**Figure S1: Risk of bias: a summary table for risk of bias for each study**

**
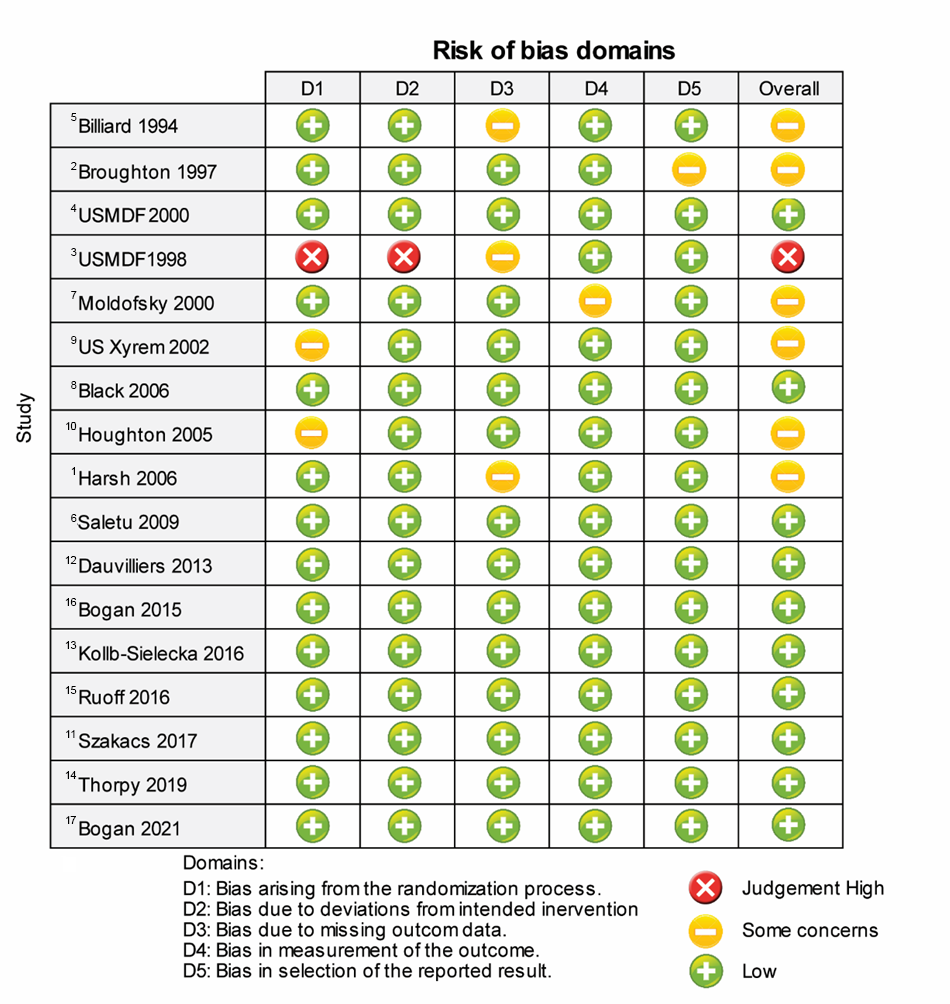
**

## Figure S2: Visualization of risk of bias

***
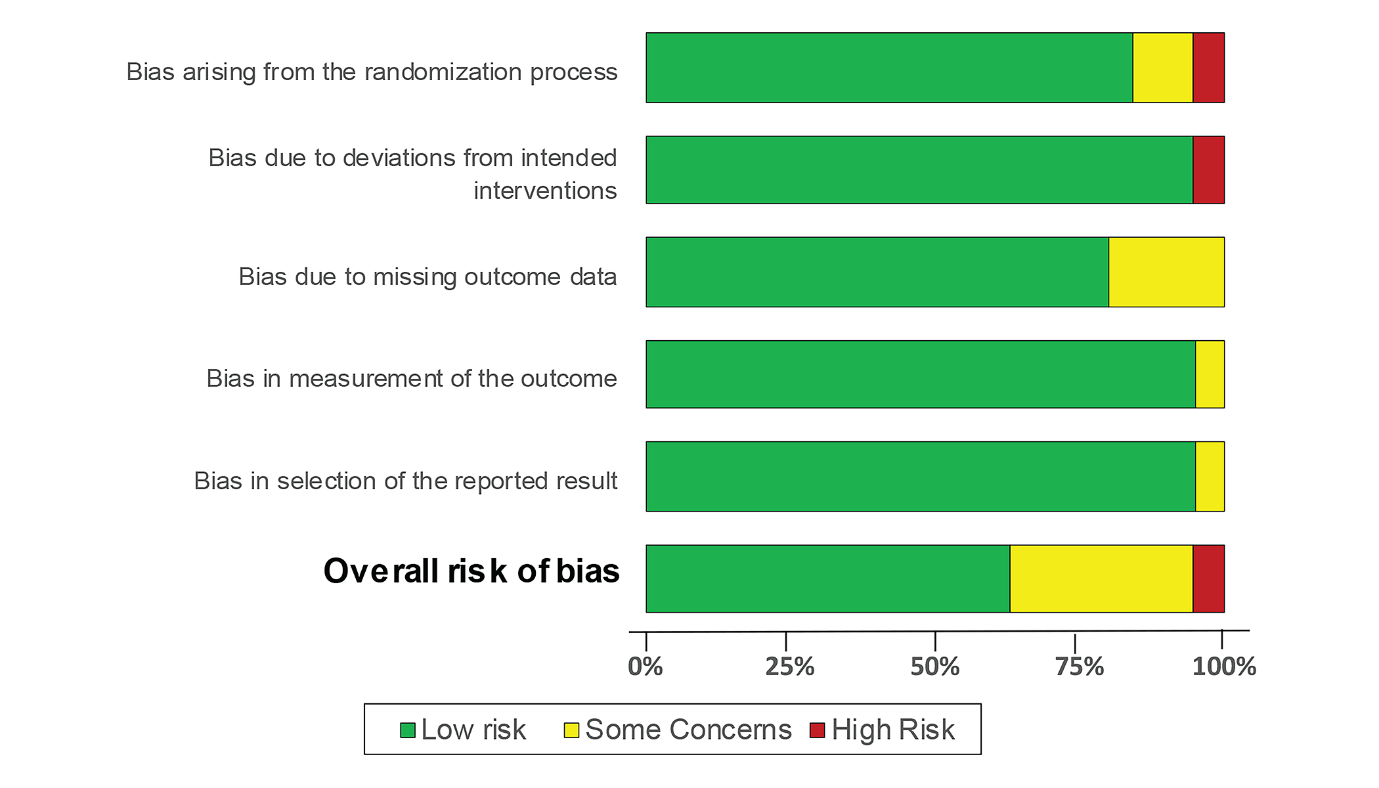
***

## Figure S3: Network of treatments involved in efficacy outcomes: A) MWT-20 min; B) MWT-40 min; C) MWT overall; D) ESS; E) CGI-C; F) PGI-C


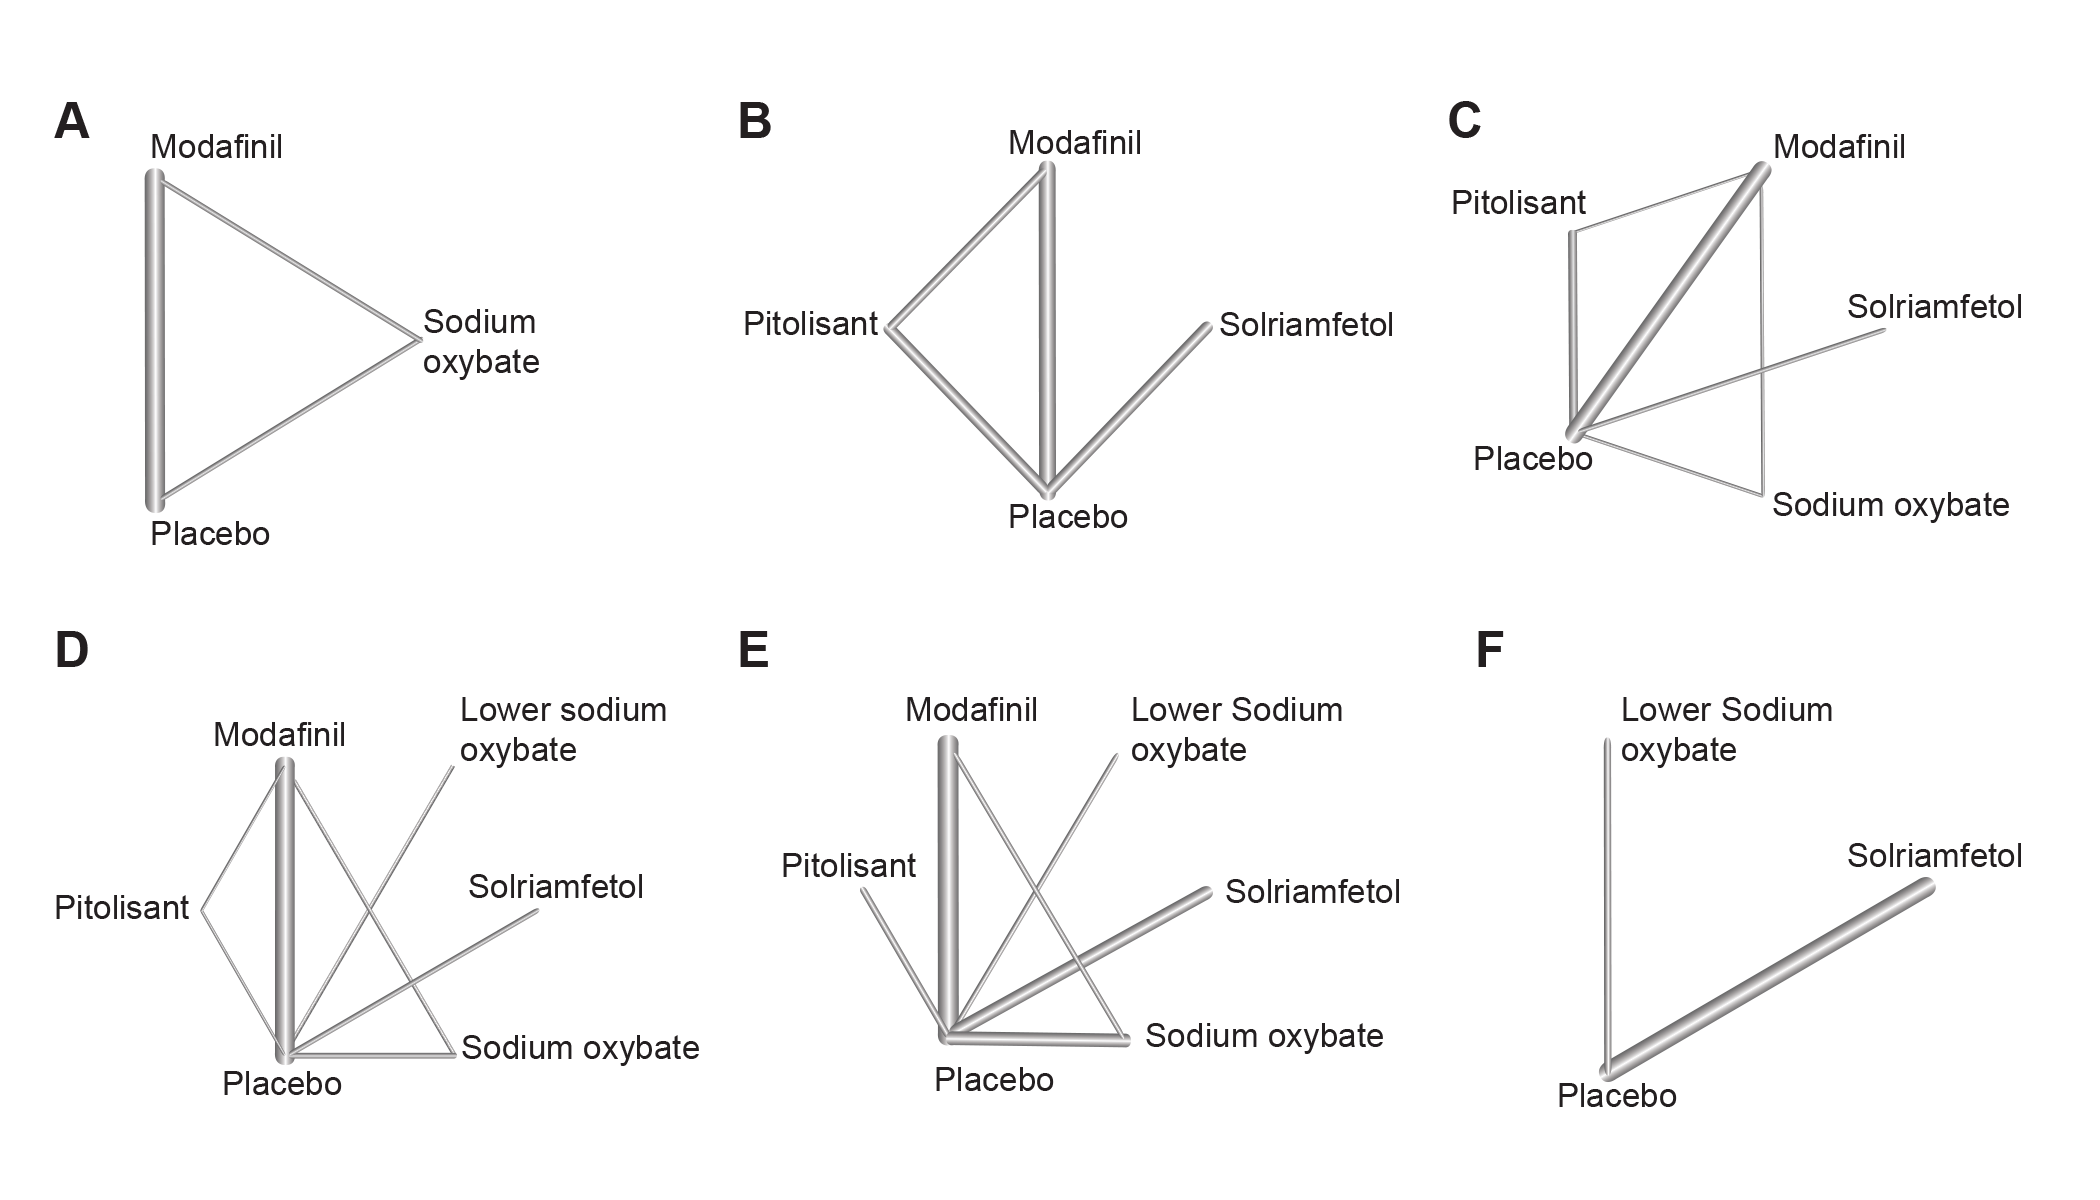


Abbreviations: MWT, Maintenance of Wakefulness Test; ESS, Epworth Sleepiness Scale; CGI-C, Clinical Global Impression of Change; PGI-C, Patient Global Impression of Change

F**igure S4: Mean difference of treatments compared to placebo in MWT subgroup analysis. A) MWT-20; B) MWT-40**

Abbreviations: MD, mean difference; MWT, Maintenance of Wakefulness Test


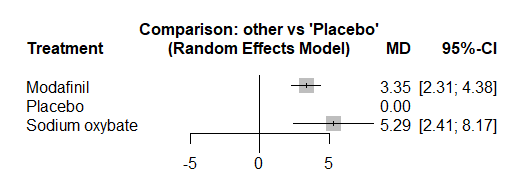

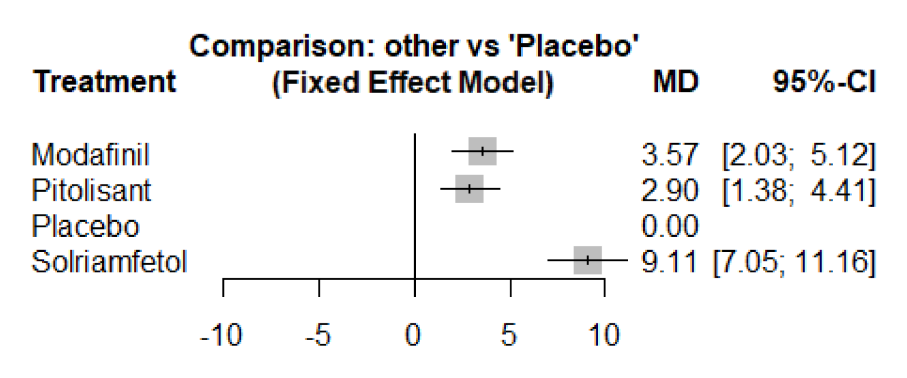


**A**

**B**

**Figure S5: Network of treatments involved in safety outcomes: A) Overall AE B) Serious AE; C) AE-leading to discontinuation; D) All-cause discontinuation**


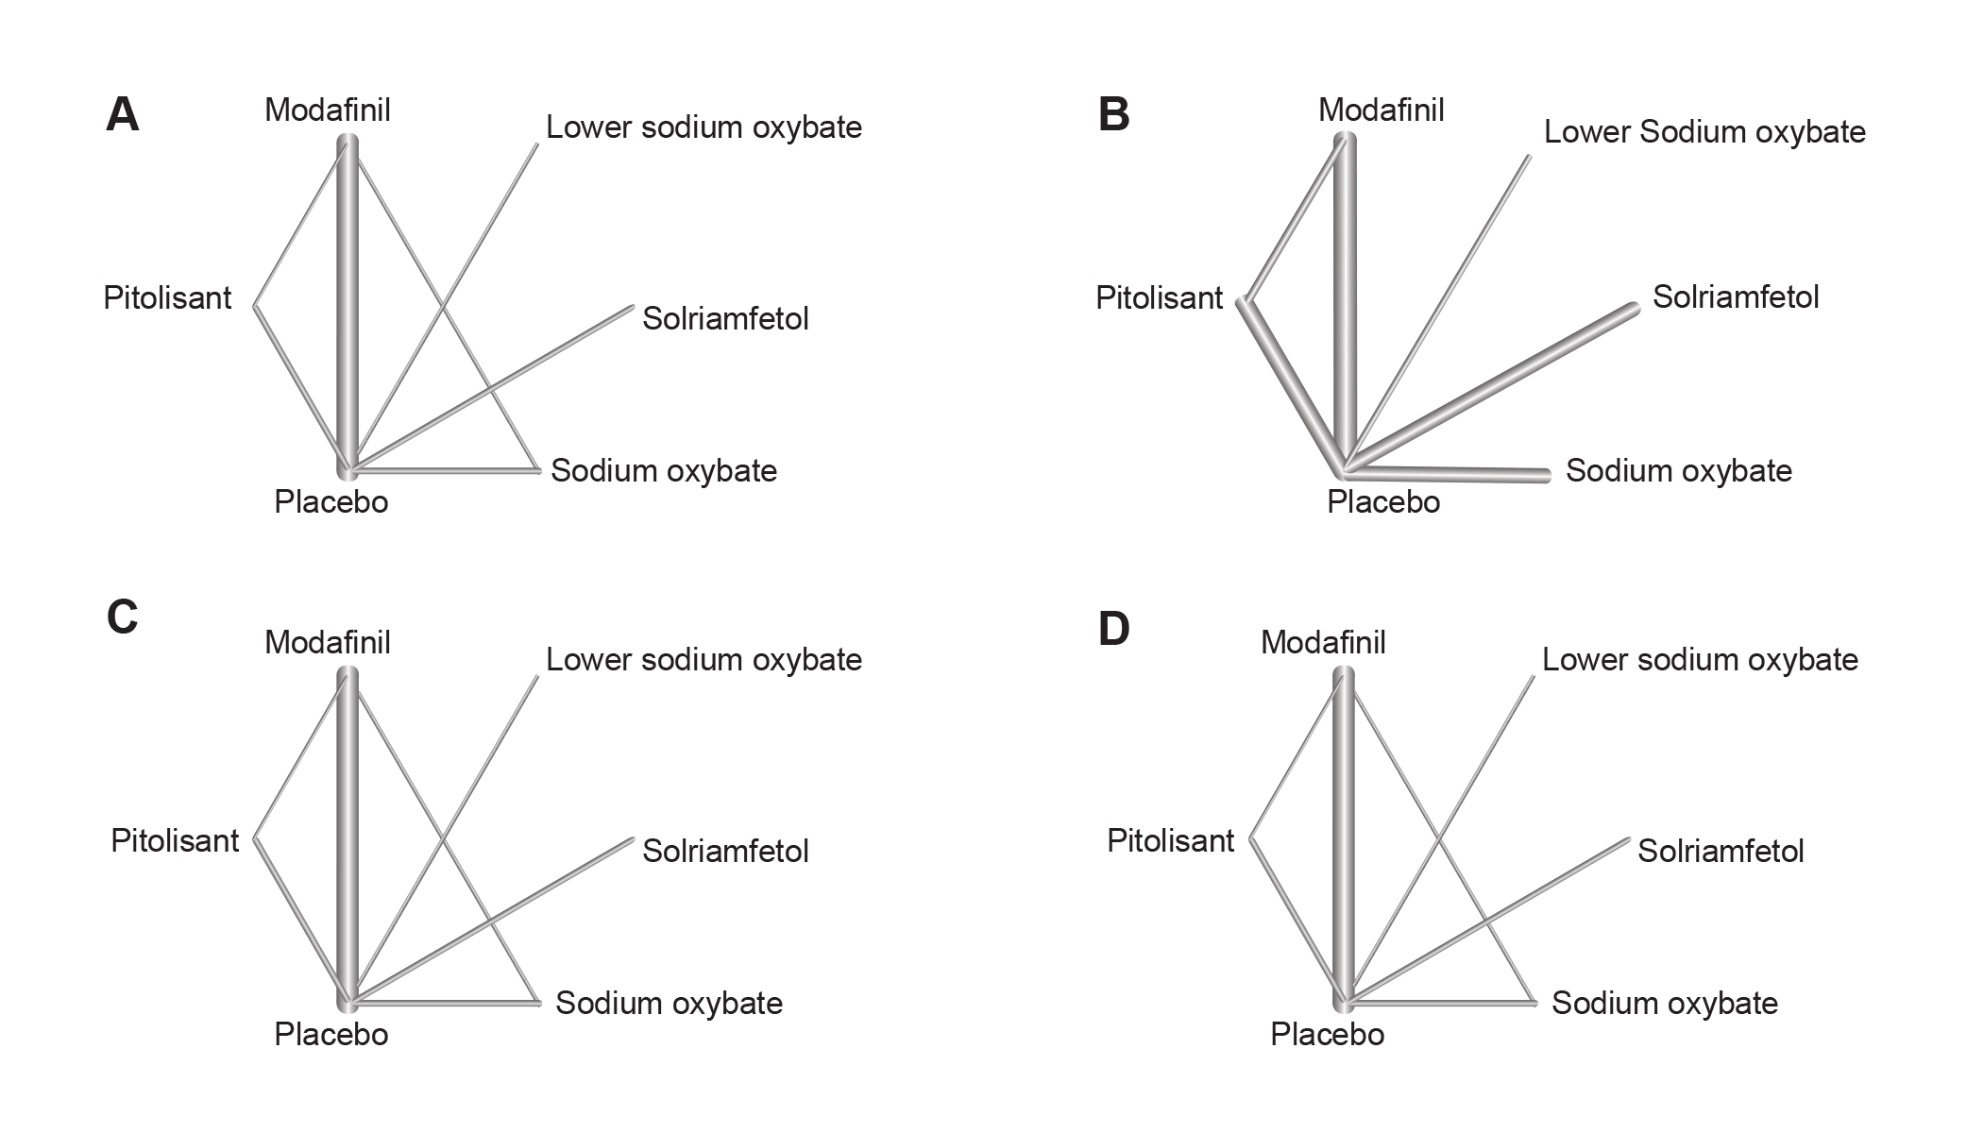


Abbreviations: AE, Adverse event

## Figure S6: Network of treatments involved in exploratory AEs: A) Headache B) Dizziness; C) Insomnia; D) Irritability; E) Nausea F) Dry mouth

*
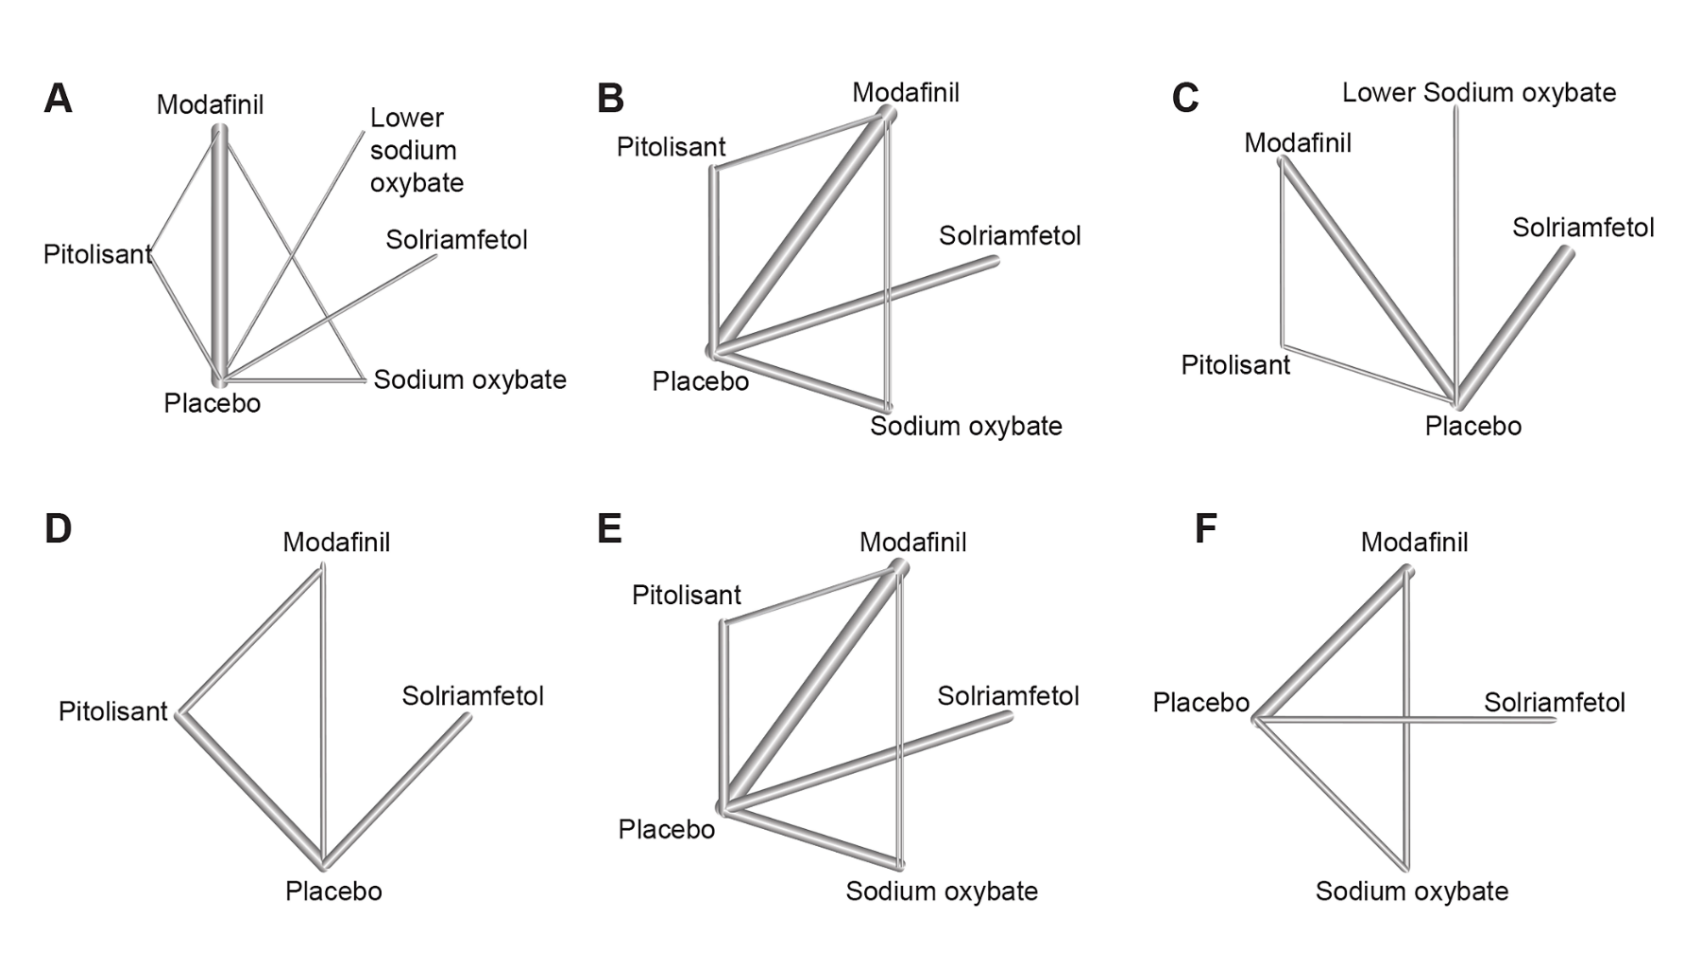
*

**Figure S7: Exploratory AEs of interest A) Headache B) Dizziness C) Insomnia D) Irritability E) Nausea F) Dry mouth**


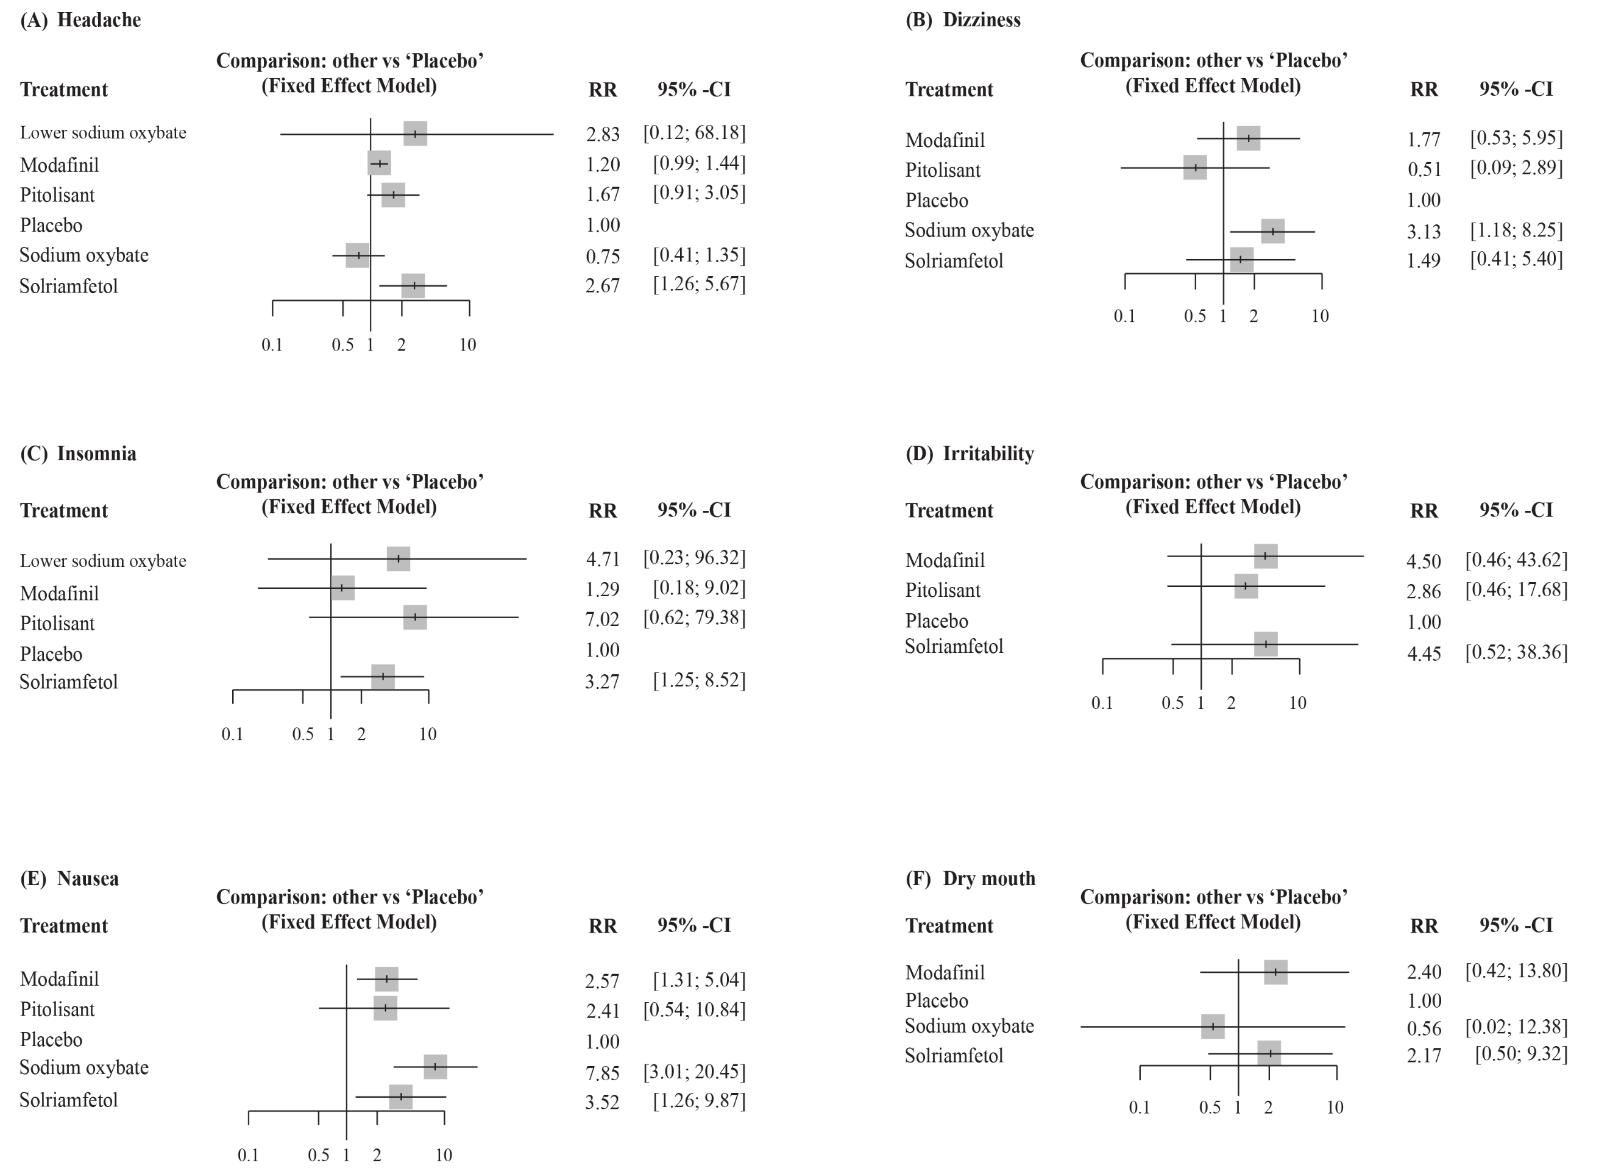


Abbreviations: AE, adverse event; RR, risk ratio

**Figure S8: Funnel plots for efficacy outcomes. A) MWT-20; B) MWT-40 min; C) MWT-overall; D) ESS; E) CGI-C; F) PGI-C**

*
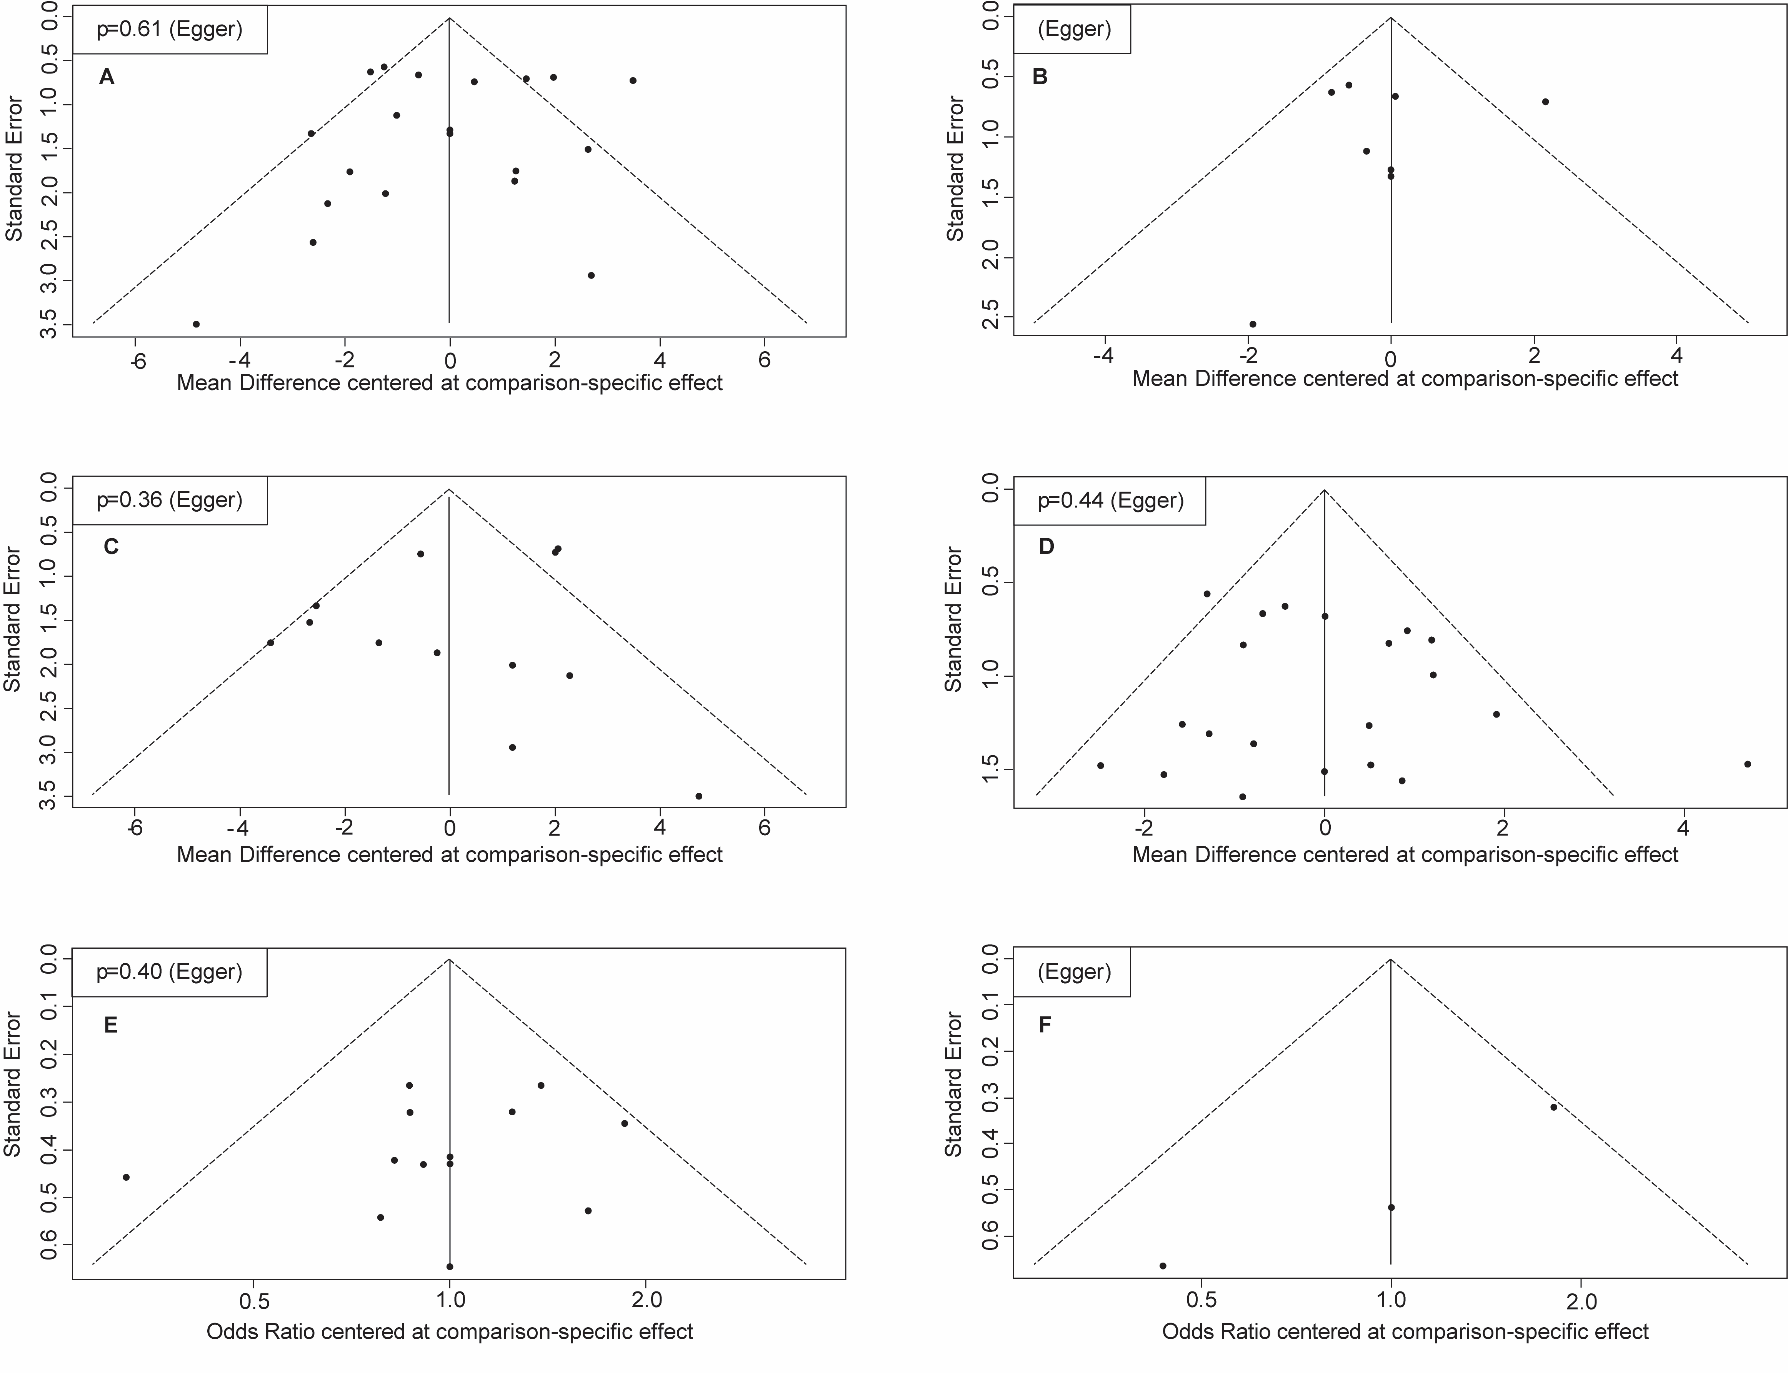
*

Abbreviations: MWT, Maintenance of Wakefulness Test; ESS, Epworth Sleepiness Scale; CGI-C, Clinical Global Impression of Change; PGI-C, Patient Global Impression of Change

**Figure S9: Funnel plots for safety outcomes. A) Overall AE risk; B) SAE; C) AE-discontinuation; D) All cause discontinuation**


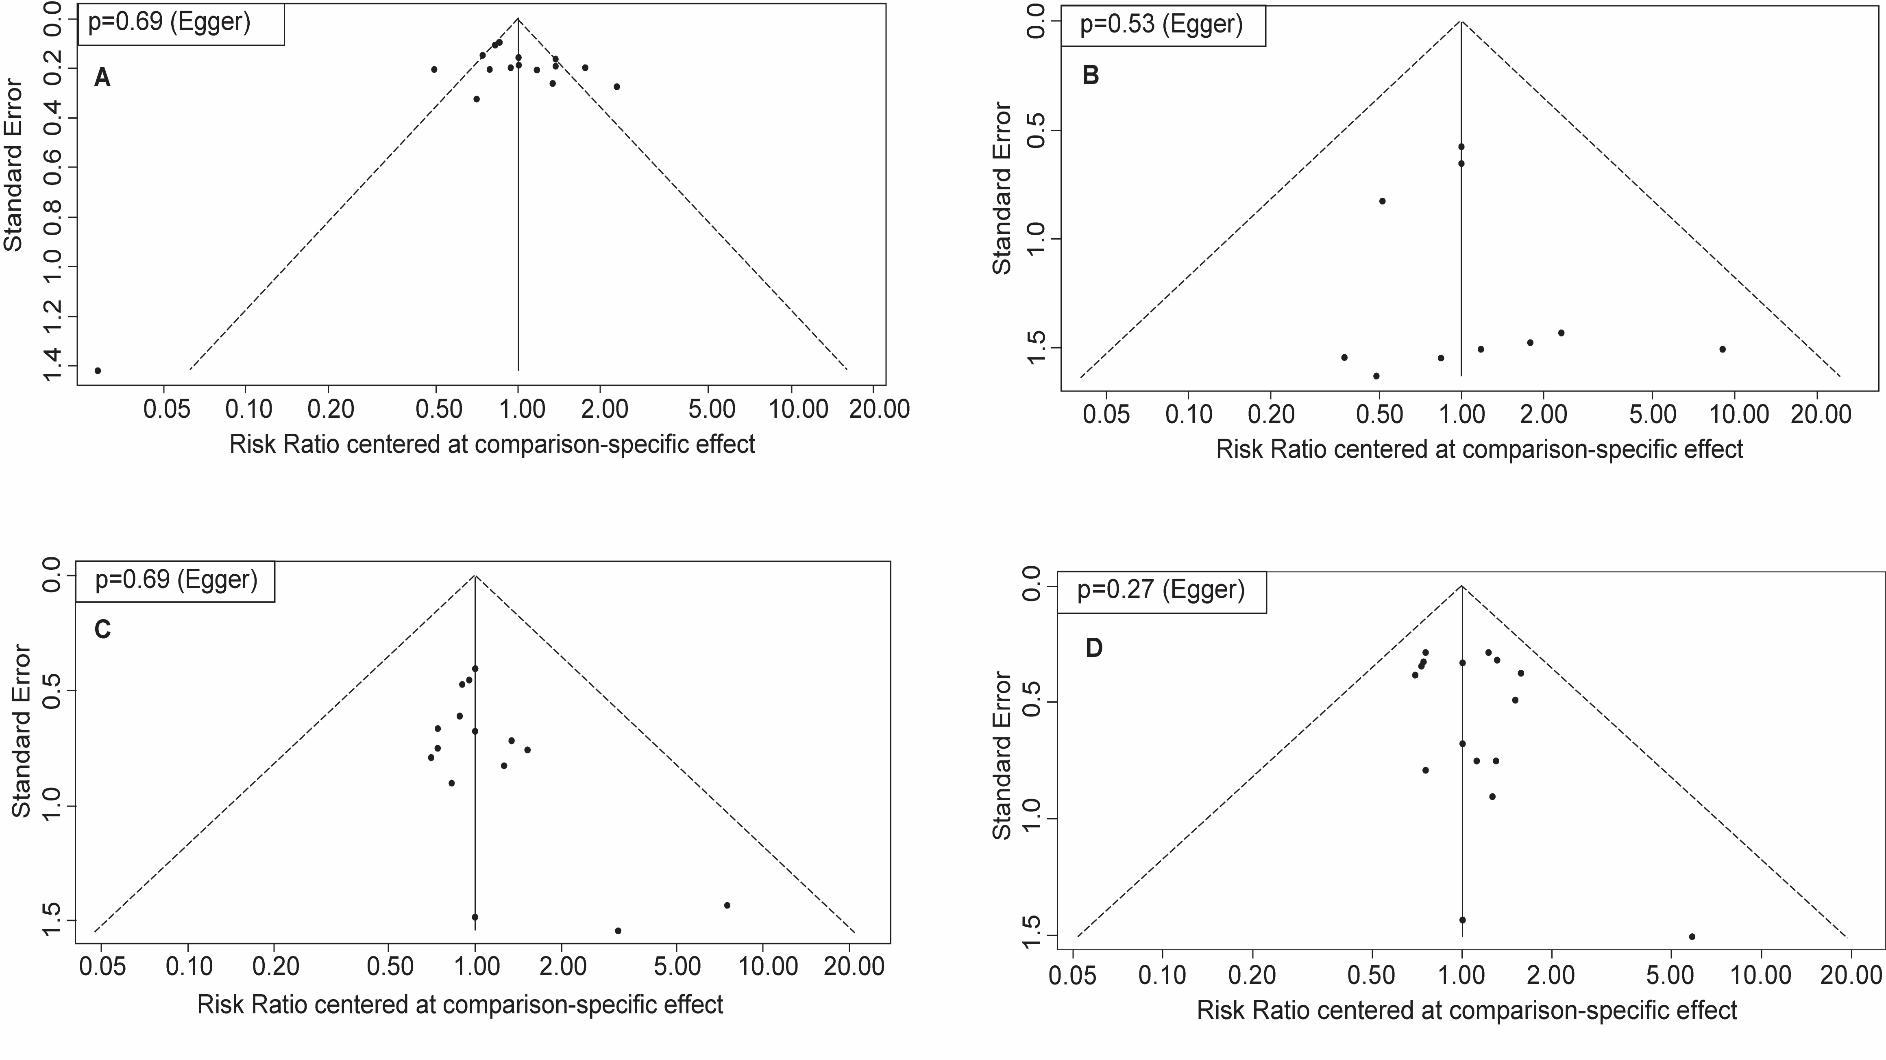


Abbreviations: AE, adverse event; SAE, serious AE

**Figure S10: Funnel plots for exploratory safety outcomes. A) Dizziness; B) Headache; C) Insomnia; D) Irritability; E) Nausea; F) Dry mouth**


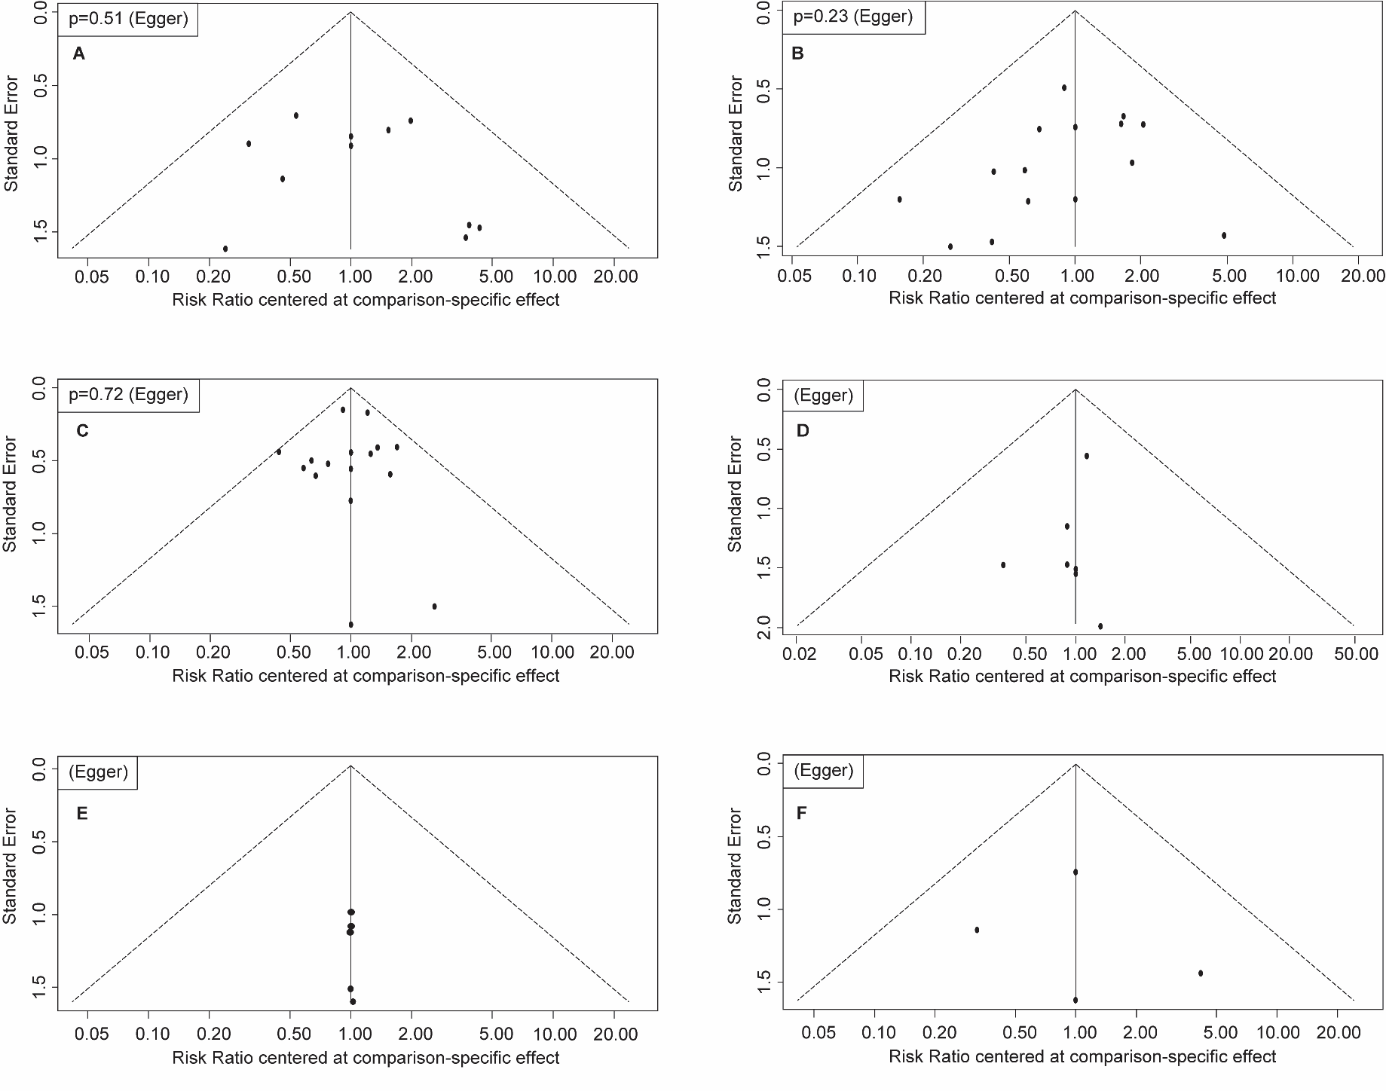


**SUPPLEMENTARY FILE 1**

Contents

1 STATISTICAL PLAN 8

1.1 Summary 8

1.2 Introduction 9

1.3 Materials & Methods 9

1.3.1 Protocol and registration 9

1.3.2 Eligibility assessment 10

1.3.3 Information sources and search 10

1.3.4 Study selection 10

1.3.5 Data collection process 10

1.3.6 Data items 11

1.3.7 Risk of bias in individual studies 11

1.3.8 Summary measures 11

1.3.9 Synthesis of results 11

2 MWT 20 12

2.1 Pairwise effect size and adjusted standard deviation 12

2.2 Results 12

2.2.1 Fixed Model 12

2.2.2 Random Model 12

2.3 Tests 12

2.4 Pairwise Comparisons: Fixed-effects model 12

2.4.1 Lower 95%-confidence limit 13

2.4.2 Upper 95%-confidence limit 13

2.5 Pairwise Comparisons: Random-effects model 13

2.5.1 Lower 95%-confidence limit: 13

2.5.2 2.5.2 Upper 95%-confidence limit 13

2.6 Pairwise comparison P values 13

2.7 Forest Plot 13

2.8 Network Evidence Graph 13

3 MWT 40 14

3.1 Pairwise effect size and adjusted standard deviation 14

3.2 Results 14

3.2.1 Fixed Model 14

3.2.2 Random Model 14

3.3 Tests 15

3.4 Pairwise Comparisons: Fixed-effects model 15

3.4.1 Lower 95%-confidence limit 15

3.4.2 Upper 95%-confidence limit 15

3.5 Pairwise Comparisons: Random-effects model 15

3.5.1 Lower 95%-confidence limit 15

3.5.2 Upper 95%-confidence limit 16

3.6 Pairwise comparison P values 16

3.7 Forest Plot 16

3.8 Network Evidence Graph 16

4 Overall MWT 17

4.1 Pairwise effect size and adjusted standard deviation 17

4.2 Results 17

4.2.1 Fixed Model 17

4.2.2 Random Model 17

4.3 Tests 18

4.4 Pairwise Comparisons: Fixed-effects model 18

4.4.1 Lower 95%-confidence limit: 18

4.4.2 Upper 95%-confidence limit 18

4.5 Pairwise Comparisons: Random-effects model 18

4.5.1 Lower 95%-confidence limit: 18

4.5.2 Upper 95%-confidence limit: 19

4.6 Pairwise comparison P values 19

4.7 Forest Plot 19

4.8 Network Evidence Graph 19

5 ESS 20

5.1 Pairwise effect size and adjusted standard deviation 20

5.2 Results 20

5.2.1 Fixed Model 20

5.2.2 Random Model 20

5.3 Tests 21

5.4 Pairwise Comparisons: Fixed-effects model 21

5.4.1 Lower 95%-confidence limit 21

5.4.2 Upper 95%-confidence limit 21

5.5 Pairwise Comparisons: Random-effects model 22

5.5.1 Lower 95%-confidence limit 22

5.5.2 Upper 95%-confidence limit 22

5.6 Pairwise comparison P values 22

5.7 Forest Plot 22

5.8 Network Evidence Graph 22

6 CGI 23

6.1 Pairwise effect size and adjusted standard deviation 23

6.2 Results 23

6.2.1 Fixed Model 23

6.2.2 Random Model 23

6.3 Tests 24

6.4 Pairwise Comparisons: Fixed-effects model 24

6.4.1 Lower 95%-confidence limit 24

6.4.2 Upper 95%-confidence limit 24

6.5 Pairwise Comparisons: Random-effects model 24

6.5.1 Lower 95%-confidence limit 25

6.5.2 Upper 95%-confidence limit 25

6.6 Pairwise comparison P values 25

6.7 Forest Plot 25

6.8 Network Evidence Graph 25

7 PGI 26

7.1 Pairwise effect size and adjusted standard deviation 26

7.2 Results 26

7.2.1 Fixed Model 26

7.2.2 Random Model 26

7.3 Tests 26

7.4 Pairwise Comparisons: Fixed-effects model 27

7.4.1 Lower 95%-confidence limit 27

7.4.2 Upper 95%-confidence limit 27

7.5 Pairwise Comparisons: Random-effects model 27

7.5.1 Lower 95%-confidence limit 27

7.5.2 Upper 95%-confidence limit 27

7.6 Pairwise comparison P values 27

7.7 Forest Plot 27

7.8 Network Evidence Graph 27

8 Overall AE incidence 28

8.1 Pairwise effect size and adjusted standard deviation 28

8.2 Results 28

8.2.1 Fixed model 28

8.2.2 Random model 29

8.3 Tests 29

8.4 Pairwise comparisons-fixed model 29

8.4.1 Lower 95% confidence limit 29

8.4.2 Upper 95% confidence limit 29

8.5 Pairwise comparisons-random model 30

8.5.1 Lower 95% confidence limit 30

8.5.2 Upper 95% confidence limit 30

8.6 P scores 30

8.7 Forest plot 30

8.8 Network evidence 30

9 Serious adverse events 31

9.1 Pairwise effect size and adjusted standard deviation 31

9.2 Results 31

9.2.1 Fixed Model 31

9.2.2 Random Model 31

9.3 Tests 32

9.4 Pairwise Comparisons-Fixed model 32

9.4.1 Lower 95% confidence limit 32

9.4.2 Upper 95% confidence limit 32

9.5 Pairwise comparisons-Random model 32

9.5.1 Lower 95% confidence limit 32

9.5.2 Upper 95% confidence limit 33

9.6 Pairwise comparison P values 33

9.7 Forest plot 33

9.8 Network evidence graph 33

10 AEs leading to discontinuation 33

10.1 Pairwise effect size and adjusted standard deviation 34

10.2 Results 34

10.2.1 Fixed Model 34

10.2.2 Random Model 34

10.3 Tests 34

10.4 Pairwise Comparisons: Fixed-effects model 35

10.4.1 Lower 95%-confidence limit 35

10.4.2 Upper 95%-confidence limit 35

10.5 Pairwise Comparisons: Random-effects model 35

10.5.1 Lower 95%-confidence limit 35

10.5.2 Upper 95%-confidence limit 35

10.6 Pairwise comparison P values 35

10.7 Forest Plot 36

10.8 Network Evidence Graph 36

11 All-cause discontinuation 36

11.1 Pairwise effect size and adjusted standard deviation 36

11.2 Results 37

11.2.1 Fixed-effects model 37

11.2.2 Random Model 37

11.3 Tests 37

11.4 Pairwise comparisons – Fixed model 37

11.4.1 Lower 95% confidence limit: 38

11.4.2 Upper 95% confidence limit: 38

11.5 Pairwise comparisons – Random model 38

11.5.1 Lower 95% confidence limit: 38

11.5.2 Upper 95% confidence limit: 38

11.6 Pairwise comparison P values 38

11.7 Forest plot 39

11.8 Network Evidence Graph 39

EXPLORATORY STUDIES 39

12 Headache 39

12.1 Pairwise effect size and adjusted standard deviation 39

12.2 Results 40

12.2.1 Fixed Model 40

12.2.2 Random Model 40

12.3 Tests 40

12.4 Pairwise Comparisons: Fixed-effects model 41

12.4.1 Lower 95%-confidence limit 41

12.4.2 Upper 95%-confidence limit 41

12.5 Pairwise Comparisons: Random-effects model 41

12.5.1 Lower 95%-confidence limit 41

12.5.2 Upper 95%-confidence limit 41

12.6 Pairwise comparison P values 41

12.7 Forest Plot 42

12.8 Network Evidence Graph 42

13 Dizziness 42

13.1 Pairwise effect size and adjusted standard deviation 42

13.2 Results 42

13.2.1 Fixed model 43

13.2.2 Random model 43

13.3 Tests 43

13.4 Pairwise comparisons-Fixed model 43

13.4.1 Lower 95% confidence limit 44

13.4.2 Upper 95% confidence limit 44

13.5 Pairwise comparisons-Random model 44

13.5.1 Lower 95% confidence limit 44

13.5.2 Upper 95% confidence limit 44

13.6 P scores 44

13.7 Forest plot 44

13.8 Network graph evidence 45

14 Insomnia 45

14.1 Pairwise effect size and adjusted standard deviation 45

14.2 Results 45

14.2.1 Fixed Model 45

14.2.2 Random Model 46

14.3 Tests 46

14.4 Pairwise Comparisons: Fixed-effects model 46

14.4.1 Lower 95%-confidence limit 46

14.4.2 Upper 95%-confidence limit 46

14.5 Pairwise Comparisons: Random-effects model 46

14.5.1 Lower 95%-confidence limit 47

14.5.2 Upper 95%-confidence limit 47

14.6 Pairwise comparison P values 47

14.7 Forest Plot 47

14.8 Network Evidence Graph 47

15 Irritability 48

15.1 Pairwise effect size and adjusted standard deviation 48

15.2 Results 48

15.2.1 Fixed Model 48

15.2.2 Random Model 48

15.3 Tests 48

15.4 Pairwise Comparisons: Fixed-effects model 48

15.4.1 Lower 95%-confidence limit 48

15.4.2 Upper 95%-confidence limit 48

15.5 Pairwise Comparisons: Random-effects model 49

15.5.1 Lower 95%-confidence limit 49

15.5.2 Upper 95%-confidence limit 49

15.6 Pairwise comparison P values 49

15.7 Forest Plot 49

15.8 Network Evidence Graph 49

16 Nausea 50

16.1 Pairwise effect size and adjusted standard deviation 50

16.2 Results 50

16.2.1 Fixed model 50

16.2.2 Random model 51

16.3 Tests 51

16.4 Pairwise comparisons-Fixed model 51

16.4.1 Lower 95% confidence limit 51

16.4.2 Upper 95% confidence limit 51

16.5 Pairwise comparisons-random model 52

16.5.1 Lower 95% confidence limit 52

16.5.2 Lower 95% confidence limit 52

16.6 P scores 52

16.7 Forest plot 52

16.8 Network image 52

17 Dry Mouth 53

17.1 Pairwise effect size and adjusted standard deviation 53

17.2 Results 53

17.2.1 Fixed Model 53

17.2.2 Random Model 53

17.3 Tests 53

17.4 Pairwise Comparisons: Fixed-effects model 54

17.4.1 Lower 95%-confidence limit 54

17.4.2 Upper 95%-confidence limit 54

17.5 Pairwise Comparisons: Random-effects model 54

17.5.1 Lower 95%-confidence limit 54

17.5.2 Upper 95%-confidence limit 54

17.6 Pairwise comparison P values 54

17.7 Forest Plot 54

17.8 Network Evidence Graph 55

# STATISTICAL PLAN

## Summary

Narcolepsy is an area of active drug research with new agents being approved over the past few years. This study aims to systematically update the comparative efficacy and safety of approved multiple wake-promoting agents in patients with narcolepsy. A systematic search of literature databases for randomized controlled trials (RCTs) was based on the Food and Drug Administration (FDA)-/European Medicine Agency (EMA)-approved interventions in patients who met established criteria for narcolepsy. Efficacy outcomes were the Epworth Sleepiness Scale (ESS), Maintenance of Wakefulness Test (MWT), Clinical Global Impression of Change (CGI-C), and Patient Global Impression of Change (PGI-C). Safety outcomes were overall adverse event (AE) risk, serious AEs, AE leading to discontinuation, all-cause discontinuation, and exploratory AEs. The final analysis included 17 RCTs with five drug treatments: modafinil/armodafinil, sodium oxybate (SXB), pitolisant, solriamfetol, and lower-sodium oxybate (LXB). For efficacy measures, solriamfetol was significantly effective for improving MWT (9.11 min; 95% confidence interval [CI], 7.05–11.16), ESS (−4.79; 95% CI, −6.56 to −3.01), and PGI-C scores (9.39; 95% CI, 2.37–37.19), whereas with CGI-C, LXB was most effective (9.67; 95% CI, 2.73–34.26) compared with placebo. Among safety measures, LXB had a least relative risk for overall AEs (0.56; 95% CI, 0.20–1.53), serious adverse events (SAEs; 0.33; 95% CI, 0.09–1.20), AEs leading to treatment discontinuation (0.11; 95% CI, 0.01–2.04), and all-cause discontinuation (0.04; 95% CI, 0.00–0.67) compared with placebo. For exploratory AE analysis, placebo had a low risk among treatments. Overall, wake-promoting agents are effective in controlling the symptoms of narcolepsy with acceptable tolerability. Solriamfetol was the most efficacious, whereas LXB had a good safety profile with placebo having a least individual AE risk.

## Introduction

Narcolepsy is a chronic and disabling neurological disorder characterized by excessive daytime sleepiness (EDS) with cataplexy, hypnagogic hallucination, and sleep paralysis. Globally, narcolepsy affects 0.05% of the population and has a negative impact on quality of life. Symptoms of narcolepsy include EDS because of which patients undergo undue psychosocial distress. 18 Also, narcolepsy is associated with a high risk of co-morbidities. The *International Classification of Sleep Disorders, third edition* (ICSD-III)19 classifies narcolepsy as type 1 (with cataplexy) and type 2 (without cataplexy) narcolepsy. The FDA-approved medications for the treatment of EDS associated with narcolepsy are modafinil, armodafinil, pitolisant, oxybate compounds (SXB; calcium, magnesium, potassium, and SXBs), and solriamfetol.20-22 Other psychostimulants (methylphenidate and amphetamines) empirically used to treat narcolepsy did not provide any evidence through RCTs and were eliminated.

At present, fewer studies exist that compares the efficacy and safety of medical treatment interventions for patients with symptoms of narcolepsy, limiting to three to four 23-25 drugs. Hence, the comparison of FDA-/EMA-approved available treatments for narcolepsy necessitates to address this unmet need. We therefore aim to compare the efficacy and safety of multiple wake-promoting agents approved by the FDA/EMA for the treatment of EDS in narcolepsy.

## Materials & Methods

### Protocol and registration

The protocol is according to the PRISMA26 guidelines and registered at the PROSPERO database before the study initiation.

### Eligibility assessment

Eligibility was generally defined by the selection of Patients, Intervention, Comparison and Outcomes (PICO). Patients were adults aged ≥ 18 years diagnosed with narcolepsy irrespective of gender. Double-blind, randomized, clinical trials published in English language were included in the study. Case reports, post hoc, reviews, systematic review, meta-analysis, non-comparative study, and cost-related studies were included in the study. Interventions of interest included the FDA-approved wake-promoting agents (modafinil, armodafinil, pitolisant, oxybate compounds [SXB; LXB], and solriamfetol). Comparison was conducted between the identified treatments and placebo (considered as control treatment); however, comparison between any pair of treatments was also sought. The outcomes of ESS and MWT are the main outcomes in this study. Other efficacy outcomes measured were changes in disease severity, as measured by the CGI-C or PGI-C scores. Safety outcomes included in the study were overall risk of AEs, overall risk of SAEs, AEs leading to discontinuation, incidences of drug abuse, and exploratory AEs by category such as Central nervous system, gastro-intestinal, and weight.

### Information sources and search

Electronic searches were performed in the following electronic databases: PubMed/MEDLINE, EMBASE, the Cochrane Central Register of Controlled Trials (CENTRAL, Cochrane Library), World Health Organization (WHO) International Trials Registry Platform (ICTRP) search portal, ClinicalTrials.gov, the United States FDA website, and the EMA website. Search queries comprised a conjunctive/disjunctive list of the following key words: narcolepsy, modafinil, pitolisant, sodium oxybate, solriamfetol, armodafinil, lower sodium oxybate, Methylphenidate and Amphetamine, with selection of RCTs, controlled trials, and adults. Once a first list of abstracts was retrieved and reviewed, each study appearing to meet inclusion criteria was independently reviewed in full by two reviewers.

### Study selection

RCTs providing data on at least one of the following selected outcomes in both efficacy and safety were selected: Epworth Excessive Sleepiness Score, MWT, and safety reporting at least existing AEs during the treatment exposure.

### Data collection process

Literature collected was screened by two independent reviewers for titles and abstracts of retrieved records and then the full texts of potentially eligible records, with discrepancies resolved by consensus or a third reviewer. Detailed data extraction and risk of bias assessment were performed by two independent reviewers, with discrepancies resolved by consensus or a third reviewer.

### Data items

We collected study design, publication year, sample size, patient disposition, and endpoints for each study. Included trials were evaluated for the handling of incomplete outcome data, selective reporting, and other potential sources of bias.

### Risk of bias in individual studies

The methodological quality of eligible RCTs and observational studies were determined using the risk-of-bias tool for randomized trials (RoB 2.0) tool.

### Summary measures

Continuous variables (ESS, MWT, CGI-C, and PGI-C) were compared by using the mean difference and odds ratio. For safety assessment, AE-related outcomes and overall discontinuation were compared by the risk ratio.

### Synthesis of results

For each efficacy endpoint, a network of evidence was constructed based on the available data from the respective studies. A network meta-analysis was performed using the netmeta package to run frequentist analyses (Version R 4.1.2). Model fitting was performed for data pooling based on random or fixed-effect model. The I2 values was assessed for heterogeneity. Based on heterogeneity, either fixed (I2 < 50%) or random model (I2 > 50%) was used. Effect estimates of mean difference or relative risk with a 95% CI formed the league tables to interpret the results. Treatment ranking by *p* scores to measure the extent of certainty that any one treatment was better than another treatment, similar to cumulative ranking curve (SUCRA), was applied in the present network meta-analysis. For value optimization, the method adapted was as described earlier. Crossover and parallel results were appropriately mixed and corrected under considerations of carryover effect. The mathematical aspects and the computations of netmeta package have been described in brief earlier 27,28.

**EFFICACY**

# MWT 20

## Pairwise effect size and adjusted standard deviation

|  | Trt1 | Trt2 | TE | seTE | seTE.adj |
| --- | --- | --- | --- | --- | --- |
| Harsh J.R 1997 | Modafinil | Placebo | 2.75 | 0.5674 | 0.5674 |
| US MDF 1998 | Modafinil | Placebo | 3.4 | 0.6619 | 0.6619 |
| Saletu 2017 | Modafinil | Placebo | 1.4 | 2.5563 | 2.5563 |
| US MDF 2000 | Modafinil | Placebo | 2.5 | 0.628 | 0.628 |
| Billiard 1994 | Modafinil | Placebo | 5.5 | 0.7103 | 0.7103 |
| Black 2006 | Placebo | Sodium oxybate | -5.1 | 1.3298 | 1.7593 |
| Black 2006 | Modafinil | Sodium oxybate | -2.11 | 1.2816 | 1.5895 |
| Black 2006 | Modafinil | Placebo | 2.99 | 1.1158 | 1.2646 |

## Results

### Fixed Model

|  | Trt 1 | Trt 2 | MD | 95%-CI | Q | leverage |
| --- | --- | --- | --- | --- | --- | --- |
| Harsh 1997 | Modafinil | Placebo | 3.3287 [ 2.7341; | 3.9234] | 1.04 | 0.29 |
| US MDF 1998 | Modafinil | Placebo | 3.3287 [ 2.7341; | 3.9234] | 0.01 | 0.21 |
| Saletu 2017 | Modafinil | Placebo | 3.3287 [ 2.7341; | 3.9234] | 0.57 | 0.01 |
| US MDF 2000 | Modafinil | Placebo | 3.3287 [ 2.7341; | 3.9234] | 1.74 | 0.23 |
| Billiard 1994 | Modafinil | Placebo | 3.3287 [ 2.7341; | 3.9234] | 9.34 | 0.18 |
| Black 2006 | Placebo | Sodium oxybate | -5.2865 [-7.6212; | -2.9518] | 0.01 | . |
| Black 2006 | Modafinil | Sodium oxybate | -1.9578 [-4.2848; | 0.3693] | 0.01 | . |
| Black 2006 | Modafinil | Placebo | 3.3287 [ 2.7341; | 3.9234] | 0.07 | . |

### Random Model

|  | Trt 1 | Trt 2 | MD | 95%-CI |
| --- | --- | --- | --- | --- |
| Harsh 1997 | Modafinil | Placebo | 3.3468 [ 2.3139; | 4.3796] |
| US MDF 1998 | Modafinil | Placebo | 3.3468 [ 2.3139; | 4.3796] |
| Saletu 2017 | Modafinil | Placebo | 3.3468 [ 2.3139; | 4.3796] |
| US MDF 2000 | Modafinil | Placebo | 3.3468 [ 2.3139; | 4.3796] |
| Billiard 1994 | Modafinil | Placebo | 3.3468 [ 2.3139; | 4.3796] |
| Black 2006 | Placebo | Sodium oxybate | -5.2888 [-8.1693; | -2.4083] |
| Black 2006 | Modafinil | Sodium oxybate | -1.9420 [-4.8117; | 0.9278] |
| Black 2006 | Modafinil | Placebo | 3.3468 [ 2.3139; | 4.3796] |

## Tests

Number of studies: k = 6

Number of treatments: n = 3

Number of pairwise comparisons: m = 8

Number of designs: d = 2

Quantifying heterogeneity / inconsistency:

tau^2 = 0.9197; tau = 0.9590; I^2 = 60.9% [4.4%; 84.0%]

Tests of heterogeneity (within designs) and inconsistency (between designs):

|  | Q | d.f. | p-value |
| --- | --- | --- | --- |
| Total | 12.8 | 5 | 0.0253 |
| Within designs | 12.7 | 4 | 0.0128 |
| Between designs | 0.1 | 1 | 0.7524 |

Q statistics to assess homogeneity / consistency

|  | Q | d.f. | p-value |
| --- | --- | --- | --- |
| Total | 12.8 | 5 | 0.0253 |
| Within designs | 12.7 | 4 | 0.0128 |
| Between designs | 0.1 | 1 | 0.7524 |

## Pairwise Comparisons: Fixed-effects model

|  | Modafinil | Placebo | Sodium oxybate |
| --- | --- | --- | --- |
| Modafinil | . | 3.3287 | -1.9578 |
| Placebo | -3.3287 | . | -5.2865 |
| Sodium oxybate | 1.9578 | 5.2865 | . |

### Lower 95%-confidence limit

|  | Modafinil | Placebo | Sodium oxybate |
| --- | --- | --- | --- |
| Modafinil | . | 2.7341 | -4.2848 |
| Placebo | -3.9234 | . | -7.6212 |
| Sodium oxybate | -0.3693 | 2.9518 | . |

### Upper 95%-confidence limit

|  | Modafinil | Placebo | Sodium oxybate |
| --- | --- | --- | --- |
| Modafinil | . | 3.9234 | 0.3693 |
| Placebo | -2.7341 | . | -2.9518 |
| Sodium oxybate | 4.2848 | 7.6212 | . |

## Pairwise Comparisons: Random-effects model

|  | Modafinil | Placebo | Sodium oxybate |
| --- | --- | --- | --- |
| Modafinil | . | 3.3468 | -1.942 |
| Placebo | -3.3468 | . | -5.2888 |
| Sodium oxybate | 1.942 | 5.2888 | . |

### Lower 95%-confidence limit:

|  | Modafinil | Placebo | Sodium oxybate |
| --- | --- | --- | --- |
| Modafinil | . | 2.3139 | -4.8117 |
| Placebo | -4.3796 | . | -8.1693 |
| Sodium oxybate | -0.9278 | 2.4083 | . |

### 2.5.2 Upper 95%-confidence limit

|  | Modafinil | Placebo | Sodium oxybate |
| --- | --- | --- | --- |
| Modafinil | . | 4.3796 | 0.9278 |
| Placebo | -2.3139 | . | -2.4083 |
| Sodium oxybate | 4.8117 | 8.1693 | . |

## Pairwise comparison P values

| Sodium oxybate | 0.9752 | 0.9537 |
| --- | --- | --- |
| Modafinil | 0.5248 | 0.5462 |
| Placebo | 0 | 0.0001 |

## Forest Plot


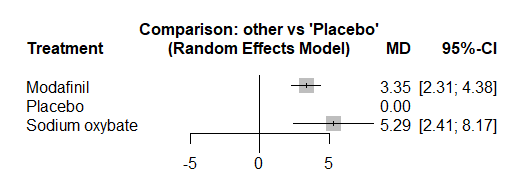


## Network Evidence Graph


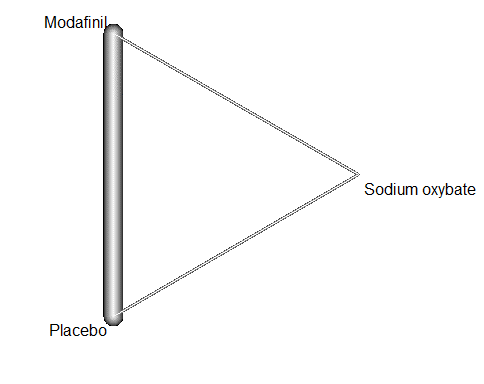


# MWT 40

## Pairwise effect size and adjusted standard deviation

|  | Trt 1 | Trt 2 | TE | seTE | seTE.adj |
| --- | --- | --- | --- | --- | --- |
| Broughton 1997 | Modafinil | Placebo | 5.25 | 1.8616 | 1.8616 |
| Dauvilliers 2013 | Pitolisant | Placebo | 2.64 | 1.0622 | 1.2846 |
| Dauvilliers 2013 | Modafinil | Pitolisant | 0.26 | 0.9681 | 1.1066 |
| Dauvilliers 2013 | Modafinil | Placebo | 2.9 | 1.1362 | 1.5307 |
| Thorpy 2019 | Placebo | Solriamfetol | -6.8333 | 1.5111 | 1.5111 |
| Ruoff 2016 | Placebo | Solriamfetol | -10.7 | 2 | 2 |
| Bogan 2015 | Placebo | Solriamfetol | -11.8 | 2.1203 | 2.1203 |
| Kollb Sielecka 2017 | Pitolisant | Placebo | 1.3 | 1.7534 | 2.2923 |
| Kollb Sielecka 2017 | Modafinil | Pitolisant | 0.8 | 1.3317 | 1.4604 |
| Kollb Sielecka 2017 | Modafinil | Placebo | 2.1 | 1.7544 | 2.2971 |
| Szakacs 2017 | Pitolisant | Placebo | 3.475 | 1.8014 | 1.8014 |
| Moldofsky 2000 | Modafinil | Placebo | 6.7 | 2.9316 | 2.9316 |

## Results

### Fixed Model

|  | Trt 1 | Trt 2 | MD | 95%-CI | Q | leverage |
| --- | --- | --- | --- | --- | --- | --- |
| Broughton 1997 | Modafinil | Placebo | 3.5729 | [ 2.0307; | 5.1150] | 0.81 |
| Dauvilliers 2013 | Pitolisant | Placebo | 2.8969 | [ 1.3819; | 4.4120] | 0.04 |
| Dauvilliers 2013 | Modafinil | Pitolisant | 0.6759 | [ -0.7785; | 2.1303] | 0.14 |
| Dauvilliers 2013 | Modafinil | Placebo | 3.5729 | [ 2.0307; | 5.1150] | 0.19 |
| Thorpy 2019 | Placebo | Solriamfetol | -9.1086 | [-11.1628; | -7.0545] | 2.27 |
| Ruoff 2016 | Placebo | Solriamfetol | -9.1086 | [-11.1628; | -7.0545] | 0.63 |
| Bogan 2015 | Placebo | Solriamfetol | -9.1086 | [-11.1628; | -7.0545] | 1.61 |
| Kollb Sielecka 2017 | Pitolisant | Placebo | 2.8969 | [ 1.3819; | 4.4120] | 0.49 |
| Kollb Sielecka 2017 | Modafinil | Pitolisant | 0.6759 | [ -0.7785; | 2.1303] | 0.01 |
| Kollb Sielecka 2017 | Modafinil | Placebo | 3.5729 | [ 2.0307; | 5.1150] | 0.41 |
| Szakacs 2017 | Pitolisant | Placebo | 2.8969 | [ 1.3819; | 4.4120] | 0.1 |
| Moldofsky 2000 | Modafinil | Placebo | 3.5729 | [ 2.0307; | 5.1150] | 1.14 |

### Random Model

|  | Trt 1 | Trt 2 | MD | 95%-CI |  |
| --- | --- | --- | --- | --- | --- |
| Broughton 1997 | Modafinil | Placebo | 3.6294 | [1.9641; | 5.2947] |
| Dauvilliers 2013 | Pitolisant | Placebo | 2.906 | [1.2458; | 4.5662] |
| Dauvilliers 2013 | Modafinil | Pitolisant | 0.7234 | [-0.9097; | 2.3565] |
| Dauvilliers 2013 | Modafinil | Placebo | 3.6294 | [1.9641; | 5.2947] |
| Thorpy 2019 | Placebo | Solriamfetol | -9.1734 | [-11.3336; | -7.0131] |
| Ruoff 2016 | Placebo | Solriamfetol | -9.1734 | [-11.3336; | -7.0131] |
| Bogan 2015 | Placebo | Solriamfetol | -9.1734 | [-11.3336; | -7.0131] |
| Kollb Sielecka 2017 | Pitolisant | Placebo | 2.906 | [1.2458; | 4.5662] |
| Kollb Sielecka 2017 | Modafinil | Pitolisant | 0.7234 | [-0.9097; | 2.3565] |
| Kollb Sielecka 2017 | Modafinil | Placebo | 3.6294 | [1.9641; | 5.2947] |
| Szakacs 2017 | Pitolisant | Placebo | 2.906 | [1.2458; | 4.5662] |
| Moldofsky 2000 | Modafinil | Placebo | 3.6294 | [1.9641; | 5.2947] |

## Tests

Number of studies: k = 8

Number of treatments: n = 4

Number of pairwise comparisons: m = 12

Number of designs: d = 4

Quantifying heterogeneity / inconsistency:

tau^2 = 0.3203; tau = 0.5660; I^2 = 10.7% [0.0%; 71.1%]

Tests of heterogeneity (within designs) and inconsistency (between designs):

|  | Q | d.f. | p-value |
| --- | --- | --- | --- |
| Total | 7.84 | 7 | 0.3467 |
| Within designs | 5.12 | 5 | 0.4013 |
| Between designs | 2.72 | 2 | 0.2565 |

Q statistics to assess homogeneity / consistency

|  | Q | d.f. | p-value |
| --- | --- | --- | --- |
| Total | 7.84 | 7 | 0.3467 |
| Within designs | 5.12 | 5 | 0.4013 |
| Between designs | 2.72 | 2 | 0.2565 |

## Pairwise Comparisons: Fixed-effects model

|  | Modafinil | Pitolisant | Placebo | Solriamfetol |
| --- | --- | --- | --- | --- |
| Modafinil | . | 0.6759 | 3.5729 | -5.5358 |
| Pitolisant | -0.6759 | . | 2.8969 | -6.2117 |
| Placebo | -3.5729 | -2.8969 | . | -9.1086 |
| Solriamfetol | 5.5358 | 6.2117 | 9.1086 | . |

### Lower 95%-confidence limit

|  | Modafinil | Pitolisant | Placebo | Solriamfetol |
| --- | --- | --- | --- | --- |
| Modafinil | . | -0.7785 | 2.0307 | -8.1044 |
| Pitolisant | -2.1303 | . | 1.3819 | -8.7641 |
| Placebo | -5.115 | -4.412 | . | -11.1628 |
| Solriamfetol | 2.9671 | 3.6592 | 7.0545 | . |

### Upper 95%-confidence limit

|  | Modafinil | Pitolisant | Placebo | Solriamfetol |
| --- | --- | --- | --- | --- |
| Modafinil | . | 2.1303 | 5.115 | -2.9671 |
| Pitolisant | 0.7785 | . | 4.412 | -3.6592 |
| Placebo | -2.0307 | -1.3819 | . | -7.0545 |
| Solriamfetol | 8.1044 | 8.7641 | 11.1628 | . |

## Pairwise Comparisons: Random-effects model

|  | Modafinil | Pitolisant | Placebo | Solriamfetol |
| --- | --- | --- | --- | --- |
| Modafinil | . | 0.6759 | 3.5729 | -5.5358 |
| Pitolisant | -0.6759 | . | 2.8969 | -6.2117 |
| Placebo | -3.5729 | -2.8969 | . | -9.1086 |
| Solriamfetol | 5.5358 | 6.2117 | 9.1086 | . |

### Lower 95%-confidence limit

|  | Modafinil | Pitolisant | Placebo | Solriamfetol |
| --- | --- | --- | --- | --- |
| Modafinil | . | -0.7785 | 2.0307 | -8.1044 |
| Pitolisant | -2.1303 | . | 1.3819 | -8.7641 |
| Placebo | -5.115 | -4.412 | . | -11.1628 |
| Solriamfetol | 2.9671 | 3.6592 | 7.0545 | . |

### Upper 95%-confidence limit

|  | Modafinil | Pitolisant | Placebo | Solriamfetol |
| --- | --- | --- | --- | --- |
| Modafinil | . | 2.1303 | 5.115 | -2.9671 |
| Pitolisant | 0.7785 | . | 4.412 | -3.6592 |
| Placebo | -2.0307 | -1.3819 | . | -7.0545 |
| Solriamfetol | 8.1044 | 8.7641 | 11.1628 | . |

## Pairwise comparison P values

|  | P-score (fixed) | P-score (random) |
| --- | --- | --- |
| Solriamfetol | 1 | 1 |
| Modafinil | 0.6063 | 0.6025 |
| Pitolisant | 0.3937 | 0.3974 |
| Placebo | 0 | 0.0001 |

## Forest Plot


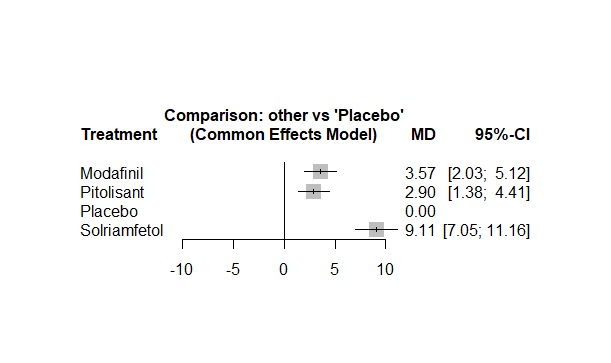


## Network Evidence Graph


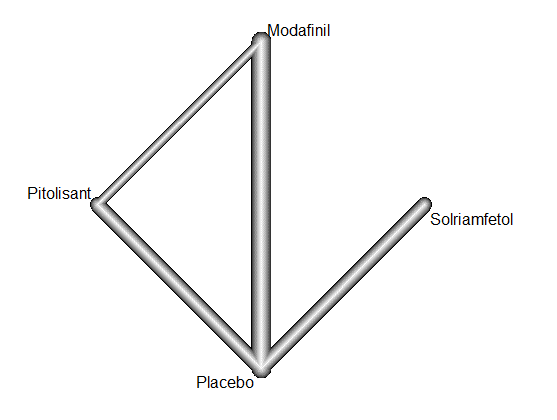


# Overall MWT

## Pairwise effect size and adjusted standard deviation

|  | treat1 | treat2 | TE | seTE se | TE.adj.f | seTE.adj.r narms |
| --- | --- | --- | --- | --- | --- | --- |
| Harsh J.R 1997 | Modafinil | Placebo | 3.31 | 1.1149 | 1.1149 | 1.3602 |
| Broughton 1997 | Modafinil | Placebo | 5.25 | 1.8616 | 1.8616 | 2.0181 |
| US MDF; 1998 | Modafinil | Placebo | 3.4 | 0.6619 | 0.6619 | 1.0223 |
| Saletu 2009 | Modafinil | Placebo | 1.4 | 2.5563 | 2.5563 | 2.6724 |
| US MDF 2000 | Modafinil | Placebo | 2.5 | 0.6619 | 0.6619 | 1.0223 |
| Billiard 1994 | Modafinil | Placebo | 5.5 | 0.7103 | 0.7103 | 1.0543 |
| Dauvilliers 2013 | Pitolisant | Placebo | 2.64 | 1.0622 | 1.2846 | 1.6065 |
| Dauvilliers 2013 | Modafinil | Pitolisant | 0.26 | 0.9681 | 1.1066 | 1.4521 |
| Dauvilliers 2013 | Modafinil | Placebo | 2.9 | 1.1362 | 1.5307 | 1.7856 |
| Black 2006 | Placebo | Sodium oxybate | -5.1 | 1.3395 | 1.787 | 2.0121 |
| Black 2006 | Modafinil | Sodium oxybate | -2.11 | 1.2782 | 1.5723 | 1.846 |
| Black 2006 | Modafinil | Placebo | 2.99 | 1.1234 | 1.2742 | 1.5793 |
| Thorpy 2019 | Placebo | Solriamfetol | -6.8333 | 1.5111 | 1.5111 | 1.7001 |
| Ruoff 2016 | Placebo | Solriamfetol | -10.7 | 2 | 2 | 2.1464 |
| Bogan 2015 | Placebo | Solriamfetol | -11.8 | 2.1203 | 2.1203 | 2.2589 |
| Kollb Sielecka 2017 | Pitolisant | Placebo | 1.3 | 1.7534 | 2.2923 | 2.4833 |
| Kollb Sielecka 2017 | Modafinil | Pitolisant | 0.8 | 1.3317 | 1.4604 | 1.7172 |
| Kollb Sielecka 2017 | Modafinil | Placebo | 2.1 | 1.7544 | 2.2971 | 2.4871 |
| Szakacs 2017 | Pitolisant | Placebo | 3.475 | 1.8014 | 1.8014 | 1.9627 |
| Moldofsky 2000 | Modafinil | Placebo | 6.7 | 2.9316 | 2.9316 | 3.0334 |

## Results

### Fixed Model

|  | treat1 | treat2 | MD |  | 95%-CI | Q | leverage |
| --- | --- | --- | --- | --- | --- | --- | --- |
| Harsh 1997 | Modafinil | Placebo | 3.5699 | [ 2.9474; | 4.1924] | 0.05 | 0.08 |
| Broughton 1997 | Modafinil | Placebo | 3.5699 | [ 2.9474; | 4.1924] | 0.81 | 0.03 |
| US MDF 1998 | Modafinil | Placebo | 3.5699 | [ 2.9474; | 4.1924] | 0.07 | 0.23 |
| Saletu 2009 | Modafinil | Placebo | 3.5699 | [ 2.9474; | 4.1924] | 0.72 | 0.02 |
| US MDF 2000 | Modafinil | Placebo | 3.5699 | [ 2.9474; | 4.1924] | 2.61 | 0.23 |
| Billiard 1994 | Modafinil | Placebo | 3.5699 | [ 2.9474; | 4.1924] | 7.38 | 0.2 |
| Dauvilliers 2013 | Pitolisant | Placebo | 2.8953 | [ 1.5840; | 4.2066] | 0.04 | . |
| Dauvilliers 2013 | Modafinil | Pitolisant | 0.6746 | [-0.6255; | 1.9746] | 0.14 | . |
| Dauvilliers 2013 | Modafinil | Placebo | 3.5699 | [ 2.9474; | 4.1924] | 0.19 | . |
| Black 2006 | Placebo | Sodium oxybate | -5.4269 | [ -7.7669; | -3.0868] | 0.03 | . |
| Black 2006 | Modafinil | Sodium oxybate | -1.857 | [ -4.1864; | 0.4725] | 0.03 | . |
| Black 2006 | Modafinil | Placebo | 3.5699 | [ 2.9474; | 4.1924] | 0.21 | . |
| Thorpy 2019 | Placebo | Solriamfetol | -9.1086 | [-11.1628; | -7.0545] | 2.27 | 0.48 |
| Ruoff 2016 | Placebo | Solriamfetol | -9.1086 | [-11.1628; | -7.0545] | 0.63 | 0.27 |
| Bogan 2015 | Placebo | Solriamfetol | -9.1086 | [-11.1628; | -7.0545] | 1.61 | 0.24 |
| Kollb Sielecka 2017 | Pitolisant | Placebo | 2.8953 | [ 1.5840; | 4.2066] | 0.48 | . |
| Kollb Sielecka 2017 | Modafinil | Pitolisant | 0.6746 | [ -0.6255; | 1.9746] | 0.01 | . |
| Kollb Sielecka 2017 | Modafinil | Placebo | 3.5699 | [ 2.9474; | 4.1924] | 0.41 | . |
| Szakacs 2017 | Pitolisant | Placebo | 2.8953 | [ 1.5840; | 4.2066] | 0.1 | 0.14 |
| Moldofsky 2000 | Modafinil | Placebo | 3.5699 | [ 2.9474; | 4.1924] | 1.14 | 0.01 |

### Random Model

|  | treat1 | treat2 | MD |  | 95%-CI |
| --- | --- | --- | --- | --- | --- |
| Harsh J.R 1997 | Modafinil | Placebo | 3.5547 | [2.7004; | 4.4089] |
| Broughton 1997 | Modafinil | Placebo | 3.5547 | [ 2.7004; | 4.4089] |
| US MDF; 1998 | Modafinil | Placebo | 3.5547 | [ 2.7004; | 4.4089] |
| Saletu 2009 | Modafinil | Placebo | 3.5547 | [ 2.7004; | 4.4089] |
| US MDF 2000 | Modafinil | Placebo | 3.5547 | [ 2.7004; | 4.4089] |
| Billiard 1994 | Modafinil | Placebo | 3.5547 | [ 2.7004; | 4.4089] |
| Dauvilliers 2013 | Pitolisant | Placebo | 2.855 | [ 1.2578; | 4.4521] |
| Dauvilliers 2013 | Modafinil | Pitolisant | 0.6997 | [-0.8969; | 2.2963] |
| Dauvilliers 2013 | Modafinil | Placebo | 3.5547 | [ 2.7004; | 4.4089] |
| Black 2006 | Placebo | Sodium oxybate | -5.4066 | [ -8.1127; | -2.7005] |
| Black 2006 | Modafinil | Sodium oxybate | -1.8519 | [ -4.5464; | 0.8426] |
| Black 2006 | Modafinil | Placebo | 3.5547 | [ 2.7004; | 4.4089] |
| Thorpy 2019 | Placebo | Solriamfetol | -9.2215 | [-11.4712; | -6.9718] |
| Ruoff 2016 | Placebo | Solriamfetol | -9.2215 | [-11.4712; | -6.9718] |
| Bogan 2015 | Placebo | Solriamfetol | -9.2215 | [-11.4712; | -6.9718] |
| Kollb Sielecka 2017 | Pitolisant | Placebo | 2.855 | [ 1.2578; | 4.4521] |
| Kollb Sielecka 2017 | Modafinil | Pitolisant | 0.6997 | [ -0.8969; | 2.2963] |
| Kollb Sielecka 2017 | Modafinil | Placebo | 3.5547 | [ 2.7004; | 4.4089] |
| Szakacs 2017 | Pitolisant | Placebo | 2.855 | [ 1.2578; | 4.4521] |
| Moldofsky 2000 | Modafinil | Placebo | 3.5547 | [ 2.7004; | 4.4089] |

## Tests

Number of studies: k = 14

Number of treatments: n = 5

Number of pairwise comparisons: m = 20

Number of designs: d = 5

Quantifying heterogeneity / inconsistency:

tau^2 = 0.6070; tau = 0.7791; I^2 = 31.4% [0.0%; 63.8%]

Tests of heterogeneity (within designs) and inconsistency (between designs):

|  | Q | d.f. | p-value |
| --- | --- | --- | --- |
| Total | 18.95 | 13 | 0.1248 |
| Within designs | 17.52 | 10 | 0.0636 |
| Between designs | 1.42 | 3 | 0.7003 |

Q statistics to assess homogeneity / consistency

## Pairwise Comparisons: Fixed-effects model

|  | Modafinil | Pitolisant | Placebo | Sodium oxybate | Solriamfetol |
| --- | --- | --- | --- | --- | --- |
| Modafinil | . | 0.6746 | 3.5699 | -1.857 | -5.5387 |
| Pitolisant | -0.6746 | . | 2.8953 | -2.5315 | -6.2133 |
| Placebo | -3.5699 | -2.8953 | . | -5.4269 | -9.1086 |
| Sodium oxybate | 1.857 | 2.5315 | 5.4269 | . | -3.6818 |
| Solriamfetol | 5.5387 | 6.2133 | 9.1086 | 3.6818 | . |

### Lower 95%-confidence limit:

|  | Modafinil | Pitolisant | Placebo | Sodium oxybate | Solriamfetol |
| --- | --- | --- | --- | --- | --- |
| Modafinil | . | -0.6255 | 2.9474 | -4.1864 | -7.6852 |
| Pitolisant | -1.9746 | . | 1.584 | -5.1698 | -8.6503 |
| Placebo | -4.1924 | -4.2066 | . | -7.7669 | -11.1628 |
| Sodium oxybate | -0.4725 | -0.1067 | 3.0868 | . | -6.7955 |
| Solriamfetol | 3.3923 | 3.7763 | 7.0545 | 0.5681 | . |

### Upper 95%-confidence limit

|  | Modafinil | Pitolisant | Placebo | Sodium oxybate | Solriamfetol |
| --- | --- | --- | --- | --- | --- |
| Modafinil | . | 1.9746 | 4.1924 | 0.4725 | -3.3923 |
| Pitolisant | 0.6255 | . | 4.2066 | 0.1067 | -3.7763 |
| Placebo | -2.9474 | -1.584 | . | -3.0868 | -7.0545 |
| Sodium oxybate | 4.1864 | 5.1698 | 7.7669 | . | -0.5681 |
| Solriamfetol | 7.6852 | 8.6503 | 11.1628 | 6.7955 | . |

## Pairwise Comparisons: Random-effects model

|  | Modafinil | Pitolisant | Placebo | Sodium oxybate | Solriamfetol |
| --- | --- | --- | --- | --- | --- |
| Modafinil | . | 0.6997 | 3.5547 | -1.8519 | -5.6668 |
| Pitolisant | -0.6997 | . | 2.855 | -2.5516 | -6.3665 |
| Placebo | -3.5547 | -2.855 | . | -5.4066 | -9.2215 |
| Sodium oxybate | 1.8519 | 2.5516 | 5.4066 | . | -3.8149 |
| Solriamfetol | 5.6668 | 6.3665 | 9.2215 | 3.8149 | . |

### Lower 95%-confidence limit:

|  | Modafinil | Pitolisant | Placebo | Sodium oxybate | Solriamfetol |
| --- | --- | --- | --- | --- | --- |
| Modafinil | . | -0.8969 | 2.7004 | -4.5464 | -8.0732 |
| Pitolisant | -2.2963 | . | 1.2578 | -5.6301 | -9.1255 |
| Placebo | -4.4089 | -4.4521 | . | -8.1127 | -11.4712 |
| Sodium oxybate | -0.8426 | -0.5268 | 2.7005 | . | -7.334 |
| Solriamfetol | 3.2604 | 3.6075 | 6.9718 | 0.2957 | . |

### Upper 95%-confidence limit:

|  | Modafinil | Pitolisant | Placebo | Sodium oxybate | Solriamfetol |
| --- | --- | --- | --- | --- | --- |
| Modafinil | . | 2.2963 | 4.4089 | 0.8426 | -3.2604 |
| Pitolisant | 0.8969 | . | 4.4521 | 0.5268 | -3.6075 |
| Placebo | -2.7004 | -1.2578 | . | -2.7005 | -6.9718 |
| Sodium oxybate | 4.5464 | 5.6301 | 8.1127 | . | -0.2957 |
| Solriamfetol | 8.0732 | 9.1255 | 11.4712 | 7.334 | . |

## Pairwise comparison P values

|  | P-score (Fixed) | P-score (random) |
| --- | --- | --- |
| Solriamfetol | 0.9974 | 0.9958 |
| Sodium oxybate | 0.7303 | 0.7189 |
| Modafinil | 0.4761 | 0.4734 |
| Pitolisant | 0.2961 | 0.3118 |
| Placebo | 0 | 0.0001 |

## Forest Plot


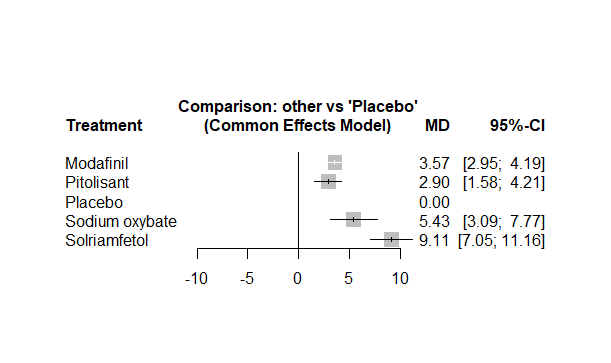


## Network Evidence Graph


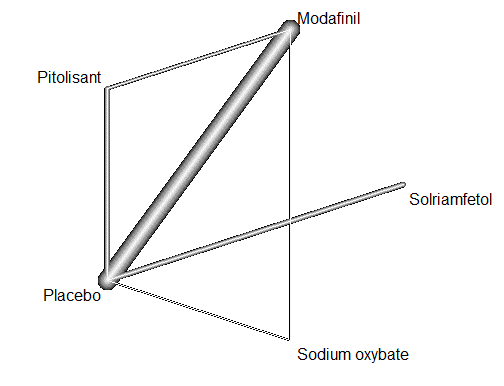


# ESS

## Pairwise effect size and adjusted standard deviation

|  | Trt 1 | Trt 2 | TE | seTE | seTE.adj |
| --- | --- | --- | --- | --- | --- |
| Harsh 1997 | Modafinil | Placebo | -1.8 | 0.7557 | 0.7557 |
| Broughton 1997 | Modafinil | Placebo | -2 | 0.8224 | 0.8224 |
| US MDF 1998 | Modafinil | Placebo | -3.4 | 0.6661 | 0.6661 |
| Saletu 2017 | Modafinil | Placebo | -5.2 | 1.479 | 1.479 |
| US MDF 2000 | Modafinil | Placebo | -3.15 | 0.6276 | 0.6276 |
| Dauvilliers 2013 | Pitolisant | Placebo | -3.6 | 1.3625 | 1.599 |
| Dauvilliers 2013 | Modafinil | Pitolisant | -0.4 | 1.5267 | 2.1274 |
| Dauvilliers 2013 | Modafinil | Placebo | -4 | 1.3066 | 1.4998 |
| Black 2006 | Placebo | sodium oxybate | 1 | 1.5566 | 1.9654 |
| Black 2006 | Modafinil | sodium oxybate | 3 | 1.5152 | 1.853 |
| Black 2006 | Modafinil | Placebo | 2 | 1.4693 | 1.7509 |
| US Xyrem 2002 | Placebo | sodium oxybate | 2.7667 | 1.6452 | 1.6452 |
| Thorpy 2019 | Placebo | Solriamfetol | 3.6 | 0.8083 | 0.8083 |
| Ruoff 2016 | Placebo | Solriamfetol | 6.1 | 0.5618 | 0.5618 |
| Bogan 2015 | Placebo | Solriamfetol | 4.3 | 1.2659 | 1.2659 |
| Kollb-Sielecka 2017 | Pitolisant | Placebo | -0.9 | 1.2061 | 1.4972 |
| Kollb-Sielecka 2017 | Modafinil | Pitolisant | -3.4 | 0.9995 | 1.1134 |
| Kollb-Sielecka 2017 | Modafinil | Placebo | -4.3 | 1.2582 | 1.704 |
| Szakacs 2017 | Pitolisant | Placebo | -3.71 | 0.8321 | 0.8321 |
| Moldofsky 2000 | Modafinil | Placebo | -2.2 | 1.4764 | 1.4764 |
| Bogan 2021 | LXB | Placebo | -3 | 0.6774 | 0.6774 |

## Results

### Fixed Model

|  | Trt 1 | Trt 2 | MD | 95%-CI | Q | leverage |
| --- | --- | --- | --- | --- | --- | --- |
| Harsh J.R 1997 | Modafinil | Placebo | -2.8966 | [-3.4886; -2.3046] | 2.11 | 0.16 |
| Broughton 1997 | Modafinil | Placebo | -2.8966 | [-3.4886; -2.3046] | 1.19 | 0.13 |
| US MDF 1998 | Modafinil | Placebo | -2.8966 | [-3.4886; -2.3046] | 0.57 | 0.21 |
| Saletu 2017 | Modafinil | Placebo | -2.8966 | [-3.4886; -2.3046] | 2.43 | 0.04 |
| US MDF 2000 | Modafinil | Placebo | -2.8966 | [-3.4886; -2.3046] | 0.16 | 0.23 |
| Dauvilliers 2013 | Pitolisant | Placebo | -2.2101 | [-3.3031; -1.1171] | 0.76 | . |
| Dauvilliers 2013 | Modafinil | Pitolisant | -0.6865 | [-1.8386; 0.4657] | 0.02 | . |
| Dauvilliers 2013 | Modafinil | Placebo | -2.8966 | [-3.4886; -2.3046] | 0.54 | . |
| Black 2006 | Placebo | sodium oxybate | 3.2606 | [ 1.2081; 5.3131] | 1.32 | . |
| Black 2006 | Modafinil | sodium oxybate | 0.364 | [-1.7195; 2.4475] | 2.02 | . |
| Black 2006 | Modafinil | Placebo | -2.8966 | [-3.4886; -2.3046] | 7.82 | . |
| U.S. Xyrem. 2002 | Placebo | sodium oxybate | 3.2606 | [ 1.2081; 5.3131] | 0.09 | 0.41 |
| Thorpy 2019 | Placebo | Solriamfetol | 5.1701 | [ 4.3206; 6.0196] | 3.77 | 0.29 |
| Ruoff 2016 | Placebo | Solriamfetol | 5.1701 | [ 4.3206; 6.0196] | 2.74 | 0.6 |
| Bogan 2015 | Placebo | Solriamfetol | 5.1701 | [ 4.3206; 6.0196] | 0.47 | 0.12 |
| Kollb-Sielecka 2017 | Pitolisant | Placebo | -2.2101 | [-3.3031; -1.1171] | 0.77 | . |
| Kollb-Sielecka 2017 | Modafinil | Pitolisant | -0.6865 | [-1.8386; 0.4657] | 5.94 | . |
| Kollb-Sielecka 2017 | Modafinil | Placebo | -2.8966 | [-3.4886; -2.3046] | 0.68 | . |
| Szakacs 2017 | Pitolisant | Placebo | -2.2101 | [-3.3031; -1.1171] | 3.25 | 0.45 |
| Moldofsky 2000 | Modafinil | Placebo | -2.8966 | [-3.4886; -2.3046] | 0.22 | 0.04 |
| Bogan 2021 | LXB | Placebo | -3 | [-4.3276; -1.6724] | 0 | 1 |

### Random Model

|  | Trt 1 | Trt 2 | MD |  | 95%-CI |
| --- | --- | --- | --- | --- | --- |
| Harsh 1997 | Modafinil | Placebo | -2.8221 | [-3.9030; | -1.7412] |
| Broughton 1997 | Modafinil | Placebo | -2.8221 | [-3.9030; | -1.7412] |
| US MDF 1998 | Modafinil | Placebo | -2.8221 | [-3.9030; | -1.7412] |
| Saletu 2017 | Modafinil | Placebo | -2.8221 | [-3.9030; | -1.7412] |
| US MDF 2000 | Modafinil | Placebo | -2.8221 | [-3.9030; | -1.7412] |
| Dauvilliers 2013 | Pitolisant | Placebo | -2.1289 | [-3.9282; | -0.3296] |
| Dauvilliers 2013 | Modafinil | Pitolisant | -0.6932 | [-2.5943; | 1.2079] |
| Dauvilliers 2013 | Modafinil | Placebo | -2.8221 | [-3.9030; | -1.7412] |
| Black 2006 | Placebo | sodium oxybate | 3.1919 | [ 0.5289; | 5.8548] |
| Black 2006 | Modafinil | sodium oxybate | 0.3698 | [-2.3781; | 3.1176] |
| Black 2006 | Modafinil | Placebo | -2.8221 | [-3.9030; | -1.7412] |
| U.S.Xyrem 2002 | Placebo | sodium oxybate | 3.1919 | [ 0.5289; | 5.8548] |
| Thorpy 2019 | Placebo | Solriamfetol | 4.7866 | [ 3.0146; | 6.5586] |
| Ruoff 2016 | Placebo | Solriamfetol | 4.7866 | [ 3.0146; | 6.5586] |
| Bogan 2015 | Placebo | Solriamfetol | 4.7866 | [ 3.0146; | 6.5586] |
| Kollb-Sielecka 2017 | Pitolisant | Placebo | -2.1289 | [-3.9282; | -0.3296] |
| Kollb-Sielecka 2017 | Modafinil | Pitolisant | -0.6932 | [-2.5943; | 1.2079] |
| Kollb-Sielecka 2017 | Modafinil | Placebo | -2.8221 | [-3.9030; | -1.7412] |
| Szakacs 2017 | Pitolisant | Placebo | -2.1289 | [-3.9282; | -0.3296] |
| Moldofsky 2000 | Modafinil | Placebo | -2.8221 | [-3.9030; | -1.7412] |
| Bogan 2021 | LXB | Placebo | -3 | [-5.8804; | -0.1196] |

## Tests

Number of studies: k = 15

Number of treatments: n = 6

Number of pairwise comparisons: m = 21

Number of designs: d = 7

Quantifying heterogeneity / inconsistency:

tau^2 = 1.7009; tau = 1.3042; I^2 = 64.7% [37.7%; 80.1%]

Tests of heterogeneity (within designs) and inconsistency (between designs):

|  | Q | d.f. | p-value |
| --- | --- | --- | --- |
| Total | 36.87 | 13 | 0.0004 |
| Within designs | 16.88 | 9 | 0.0506 |
| Between designs | 19.99 | 4 | 0.0005 |

Q statistics to assess homogeneity / consistency

|  | Q | df | p-value |
| --- | --- | --- | --- |
| Total | 36.87 | 13 | 0.0004 |
| Within designs | 16.88 | 9 | 0.0506 |
| Between designs | 19.99 | 4 | 0.0005 |

## Pairwise Comparisons: Fixed-effects model

|  | LXB | Modafinil | Pitolisant | Placebo | sodium oxybate | Solriamfetol |
| --- | --- | --- | --- | --- | --- | --- |
| LXB | . | -0.1034 | -0.7899 | -3 | 0.2606 | 2.1701 |
| Modafinil | 0.1034 | . | -0.6865 | -2.8966 | 0.364 | 2.2735 |
| Pitolisant | 0.7899 | 0.6865 | . | -2.2101 | 1.0505 | 2.96 |
| Placebo | 3 | 2.8966 | 2.2101 | . | 3.2606 | 5.1701 |
| sodium oxybate | -0.2606 | -0.364 | -1.0505 | -3.2606 | . | 1.9095 |
| Solriamfetol | -2.1701 | -2.2735 | -2.96 | -5.1701 | -1.9095 | . |

### Lower 95%-confidence limit

|  | LXB | Modafinil | Pitolisant | Placebo | sodium oxybate | Solriamfetol |
| --- | --- | --- | --- | --- | --- | --- |
| LXB | . | -1.557 | -2.5095 | -4.3276 | -2.1838 | 0.5939 |
| Modafinil | -1.3503 | . | -1.8386 | -3.4886 | -1.7195 | 1.2381 |
| Pitolisant | -0.9298 | -0.4657 | . | -3.3031 | -1.26 | 1.5757 |
| Placebo | 1.6724 | 2.3046 | 1.1171 | . | 1.2081 | 4.3206 |
| sodium oxybate | -2.705 | -2.4475 | -3.361 | -5.3131 | . | -0.3118 |
| Solriamfetol | -3.7463 | -3.3089 | -4.3443 | -6.0196 | -4.1308 | . |

### Upper 95%-confidence limit

|  | LXB | Modafinil | Pitolisant | Placebo | sodium oxybate | Solriamfetol |
| --- | --- | --- | --- | --- | --- | --- |
| LXB | . | 1.3503 | 0.9298 | -1.6724 | 2.705 | 3.7463 |
| Modafinil | 1.557 | . | 0.4657 | -2.3046 | 2.4475 | 3.3089 |
| Pitolisant | 2.5095 | 1.8386 | . | -1.1171 | 3.361 | 4.3443 |
| Placebo | 4.3276 | 3.4886 | 3.3031 | . | 5.3131 | 6.0196 |
| sodium oxybate | 2.1838 | 1.7195 | 1.26 | -1.2081 | . | 4.1308 |
| Solriamfetol | -0.5939 | -1.2381 | -1.5757 | -4.3206 | 0.3118 | . |

## Pairwise Comparisons: Random-effects model

|  | LXB | Modafinil | Pitolisant | Placebo | sodium oxybate | Solriamfetol |
| --- | --- | --- | --- | --- | --- | --- |
| LXB | . | -0.1779 | -0.8711 | -3 | 0.1919 | 1.7866 |
| Modafinil | 0.1779 | . | -0.6932 | -2.8221 | 0.3698 | 1.9645 |
| Pitolisant | 0.8711 | 0.6932 | . | -2.1289 | 1.063 | 2.6577 |
| Placebo | 3 | 2.8221 | 2.1289 | . | 3.1919 | 4.7866 |
| sodium oxybate | -0.1919 | -0.3698 | -1.063 | -3.1919 | . | 1.5947 |
| Solriamfetol | -1.7866 | -1.9645 | -2.6577 | -4.7866 | -1.5947 | . |

### Lower 95%-confidence limit

|  | LXB | Modafinil | Pitolisant | Placebo | sodium oxybate | Solriamfetol |
| --- | --- | --- | --- | --- | --- | --- |
| LXB | . | -3.2544 | -4.2673 | -5.8804 | -3.7309 | -1.5953 |
| Modafinil | -2.8986 | . | -2.5943 | -3.903 | -2.3781 | -0.1112 |
| Pitolisant | -2.5251 | -1.2079 | . | -3.9282 | -2.1133 | 0.1323 |
| Placebo | 0.1196 | 1.7412 | 0.3296 | . | 0.5289 | 3.0146 |
| sodium oxybate | -4.1146 | -3.1176 | -4.2392 | -5.8548 | . | -1.6039 |
| Solriamfetol | -5.1684 | -4.0402 | -5.1831 | -6.5586 | -4.7934 | . |

### Upper 95%-confidence limit

|  | LXB | Modafinil | Pitolisant | Placebo | sodium oxybate | Solriamfetol |
| --- | --- | --- | --- | --- | --- | --- |
| LXB | . | 2.8986 | 2.5251 | -0.1196 | 4.1146 | 5.1684 |
| Modafinil | 3.2544 | . | 1.2079 | -1.7412 | 3.1176 | 4.0402 |
| Pitolisant | 4.2673 | 2.5943 | . | -0.3296 | 4.2392 | 5.1831 |
| Placebo | 5.8804 | 3.903 | 3.9282 | . | 5.8548 | 6.5586 |
| sodium oxybate | 3.7309 | 2.3781 | 2.1133 | -0.5289 | . | 4.7934 |
| Solriamfetol | 1.5953 | 0.1112 | -0.1323 | -3.0146 | 1.6039 | . |

## Pairwise comparison P values

|  | P-score (fixed) | P-score (random) |
| --- | --- | --- |
| Solriamfetol | 0.9901 | 0.9268 |
| sodium oxybate | 0.6151 | 0.6082 |
| LXB | 0.5584 | 0.5658 |
| Modafinil | 0.5378 | 0.5291 |
| Pitolisant | 0.2984 | 0.3621 |
| Placebo | 0.0002 | 0.008 |

## Forest Plot


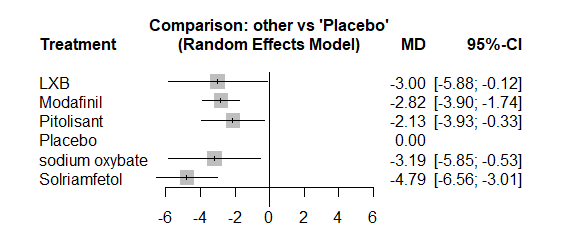


## Network Evidence Graph


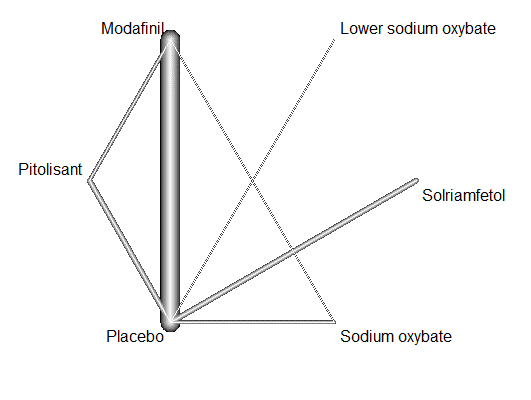


# CGI

## Pairwise effect size and adjusted standard deviation

|  | Trt 1 | Trt 2 | TE | seTE | seTE.adj |
| --- | --- | --- | --- | --- | --- |
| Harsh 1997 | Modafinil | Placebo | 1.588 | 0.3441 | 0.3441 |
| US MDF 1998 | Modafinil | Placebo | 1.293 | 0.2658 | 0.2658 |
| US MDF 2000 | Modafinil | Placebo | 0.8254 | 0.2651 | 0.2651 |
| Black 2006 | Placebo | Sodium oxybate | -1.1963 | 0.4321 | 0.5193 |
| Black 2006 | Modafinil | Sodium oxybate | -1.3669 | 0.4279 | 0.5103 |
| Black 2006 | Modafinil | Placebo | -0.1706 | 0.4577 | 0.5886 |
| U.S.Xyrem 2002 | Placebo | Sodium oxybate | -1.0918 | 0.4206 | 0.4206 |
| Xyrem 2005 | Placebo | Sodium oxybate | -1.5115 | 0.3205 | 0.3205 |
| Thorpy 2019 | Placebo | Solriamfetol | -1.6742 | 0.3221 | 0.3221 |
| Ruoff 2016 | Placebo | Solriamfetol | -2.3026 | 0.5282 | 0.5282 |
| Bogan 2015 | Placebo | Solriamfetol | -1.5702 | 0.5403 | 0.5403 |
| Szakacs 2017 | Pitolisant | Placebo | 1.3863 | 0.4142 | 0.4142 |
| Bogan 2021 | Lower-sodium oxybate | Placebo | 2.2694 | 0.6451 | 0.6451 |

## Results

### Fixed Model

|  | Trt 1 | Trt 2 | OR |  | 95%-CI | Q | leverage |
| --- | --- | --- | --- | --- | --- | --- | --- |
| Harsh 1997 | Modafinil | Placebo | 2.7135 | [2.0118; | 3.6599] | 2.94 | 0.2 |
| US MDF 1998 | Modafinil | Placebo | 2.7135 | [2.0118; | 3.6599] | 1.23 | 0.33 |
| US MDF 2000 | Modafinil | Placebo | 2.7135 | [2.0118; | 3.6599] | 0.42 | 0.33 |
| Black 2006 | Placebo | Sodium oxybate | 0.2231 | [0.1477; | 0.3370] | 0.34 | . |
| Black 2006 | Modafinil | Sodium oxybate | 0.6055 | [0.3750; | 0.9776] | 2.87 | . |
| Black 2006 | Modafinil | Placebo | 2.7135 | [2.0118; | 3.6599] | 3.94 | . |
| U.S. Xyrem 2002 | Placebo | Sodium oxybate | 0.2231 | [0.1477; | 0.3370] | 0.94 | 0.25 |
| Xyrem 2005 | Placebo | Sodium oxybate | 0.2231 | [0.1477; | 0.3370] | 0 | 0.43 |
| Thorpy 2019 | Placebo | Solriamfetol | 0.1673 | [0.1035; | 0.2704] | 0.13 | 0.58 |
| Ruoff 2016 | Placebo | Solriamfetol | 0.1673 | [0.1035; | 0.2704] | 0.95 | 0.22 |
| Bogan 2015 | Placebo | Solriamfetol | 0.1673 | [0.1035; | 0.2704] | 0.16 | 0.21 |
| Szakacs 2017 | Pitolisant | Placebo | 4 | [1.7762; | 9.0081] | 0 | 1 |
| Bogan 2021 | Lower-sodium oxybate | Placebo | 9.6738 | [2.7319; | 34.2556] | 0 | 1 |

### Random Model

|  | Trt 1 | Trt 2 | OR |  | 95%-CI |
| --- | --- | --- | --- | --- | --- |
| Harsh 1997 | Modafinil | Placebo | 2.5493 | [1.5979; | 4.0671] |
| US MDF 1998 | Modafinil | Placebo | 2.5493 | [1.5979; | 4.0671] |
| US MDF 2000 | Modafinil | Placebo | 2.5493 | [1.5979; | 4.0671] |
| Black 2006 | Placebo | Sodium oxybate | 0.2263 | [0.1273; | 0.4023] |
| Black 2006 | Modafinil | Sodium oxybate | 0.577 | [0.2910; | 1.1441] |
| Black 2006 | Modafinil | Placebo | 2.5493 | [1.5979; | 4.0671] |
| The U.S. Xyrem 2002 | Placebo | Sodium oxybate | 0.2263 | [0.1273; | 0.4023] |
| Xyrem 2005 | Placebo | Sodium oxybate | 0.2263 | [0.1273; | 0.4023] |
| Thorpy 2019 | Placebo | Solriamfetol | 0.1627 | [0.0849; | 0.3118] |
| Ruoff 2016 | Placebo | Solriamfetol | 0.1627 | [0.0849; | 0.3118] |
| Bogan 2015 | Placebo | Solriamfetol | 0.1627 | [0.0849; | 0.3118] |
| Szakacs 2017 | Pitolisant | Placebo | 4 | [1.3619; | 11.7483] |
| Bogan 2021 | Lower-sodium oxybate | Placebo | 9.6738 | [2.2707; | 41.2123] |

## Tests

Number of studies: k = 11

Number of treatments: n = 6

Number of pairwise comparisons: m = 13

Number of designs: d = 6

Quantifying heterogeneity / inconsistency:

tau^2 = 0.1306; tau = 0.3614; I^2 = 49.8% [0.0%; 77.6%]

Tests of heterogeneity (within designs) and inconsistency (between designs):

|  | Q | df | p-value |
| --- | --- | --- | --- |
| Total | 13.93 | 7 | 0.0524 |
| Within designs | 5.24 | 5 | 0.3871 |
| Between designs | 8.69 | 2 | 0.013 |

Q statistics to assess homogeneity / consistency

|  | Q | df | p-value |
| --- | --- | --- | --- |
| Total | 13.93 | 7 | 0.0524 |
| Within designs | 5.24 | 5 | 0.3871 |
| Between designs | 8.69 | 2 | 0.013 |

## Pairwise Comparisons: Fixed-effects model

|  | Lower-sodium oxybate | Modafinil | Pitolisant | Placebo | Sodium oxybate | Solriamfetol |
| --- | --- | --- | --- | --- | --- | --- |
| Lower-sodium oxybate | . | 3.565 | 2.4184 | 9.6738 | 2.1586 | 1.6182 |
| Modafinil | 0.2805 | . | 0.6784 | 2.7135 | 0.6055 | 0.4539 |
| Pitolisant | 0.4135 | 1.4741 | . | 4 | 0.8925 | 0.6691 |
| Placebo | 0.1034 | 0.3685 | 0.25 | . | 0.2231 | 0.1673 |
| Sodium oxybate | 0.4633 | 1.6516 | 1.1204 | 4.4816 | . | 0.7497 |
| Solriamfetol | 0.618 | 2.2031 | 1.4945 | 5.9781 | 1.3339 | . |

### Lower 95%-confidence limit

|  | Lower-sodium oxybate | Modafinil | Pitolisant | Placebo | Sodium oxybate | Solriamfetol |
| --- | --- | --- | --- | --- | --- | --- |
| Lower-sodium oxybate | . | 0.9722 | 0.5382 | 2.7319 | 0.5709 | 0.4184 |
| Modafinil | 0.0765 | . | 0.2856 | 2.0118 | 0.375 | 0.2577 |
| Pitolisant | 0.092 | 0.6205 | . | 1.7762 | 0.3591 | 0.2605 |
| Placebo | 0.0292 | 0.2732 | 0.111 | . | 0.1477 | 0.1035 |
| Sodium oxybate | 0.1225 | 1.0229 | 0.4507 | 2.9673 | . | 0.3981 |
| Solriamfetol | 0.1598 | 1.251 | 0.5819 | 3.6979 | 0.7083 | . |

### Upper 95%-confidence limit

|  | Lower-sodium oxybate | Modafinil | Pitolisant | Placebo | Sodium oxybate | Solriamfetol |
| --- | --- | --- | --- | --- | --- | --- |
| Lower-sodium oxybate | . | 13.0727 | 10.8671 | 34.2556 | 8.1613 | 6.2583 |
| Modafinil | 1.0286 | . | 1.6115 | 3.6599 | 0.9776 | 0.7994 |
| Pitolisant | 1.858 | 3.5018 | . | 9.0081 | 2.2186 | 1.7186 |
| Placebo | 0.3661 | 0.4971 | 0.563 | . | 0.337 | 0.2704 |
| Sodium oxybate | 1.7516 | 2.6668 | 2.785 | 6.7687 | . | 1.4119 |
| Solriamfetol | 2.39 | 3.8797 | 3.8386 | 9.6643 | 2.5122 | . |

## Pairwise Comparisons: Random-effects model

|  | Lower-sodium oxybate | Modafinil | Pitolisant | Placebo | Sodium oxybate | Solriamfetol |
| --- | --- | --- | --- | --- | --- | --- |
| Lower-sodium oxybate | . | 3.7947 | 2.4184 | 9.6738 | 2.1896 | 1.5735 |
| Modafinil | 0.2635 | . | 0.6373 | 2.5493 | 0.577 | 0.4146 |
| Pitolisant | 0.4135 | 1.5691 | . | 4 | 0.9054 | 0.6506 |
| Placebo | 0.1034 | 0.3923 | 0.25 | . | 0.2263 | 0.1627 |
| Sodium oxybate | 0.4567 | 1.733 | 1.1045 | 4.418 | . | 0.7186 |
| Solriamfetol | 0.6355 | 2.4117 | 1.537 | 6.1481 | 1.3916 | . |

### Lower 95%-confidence limit

|  | Lower-sodium oxybate | Modafinil | Pitolisant | Placebo | Sodium oxybate | Solriamfetol |
| --- | --- | --- | --- | --- | --- | --- |
| Lower-sodium oxybate | . | 0.8277 | 0.3974 | 2.2707 | 0.4604 | 0.3213 |
| Modafinil | 0.0575 | . | 0.197 | 1.5979 | 0.291 | 0.1861 |
| Pitolisant | 0.0679 | 0.4849 | . | 1.3619 | 0.2669 | 0.1848 |
| Placebo | 0.0243 | 0.2459 | 0.0851 | . | 0.1273 | 0.0849 |
| Sodium oxybate | 0.096 | 0.874 | 0.3256 | 2.4854 | . | 0.3015 |
| Solriamfetol | 0.1298 | 1.0826 | 0.4366 | 3.2076 | 0.5839 | . |

### Upper 95%-confidence limit

|  | Lower-sodium oxybate | Modafinil | Pitolisant | Placebo | Sodium oxybate | Solriamfetol |
| --- | --- | --- | --- | --- | --- | --- |
| Lower-sodium oxybate | . | 17.3977 | 14.7176 | 41.2123 | 10.4129 | 7.7055 |
| Modafinil | 1.2082 | . | 2.0623 | 4.0671 | 1.1441 | 0.9237 |
| Pitolisant | 2.5163 | 5.0774 | . | 11.7483 | 3.0709 | 2.2905 |
| Placebo | 0.4404 | 0.6258 | 0.7343 | . | 0.4023 | 0.3118 |
| Sodium oxybate | 2.1718 | 3.4362 | 3.7462 | 7.8532 | . | 1.7126 |
| Solriamfetol | 3.1123 | 5.3723 | 5.4111 | 11.784 | 3.3165 | . |

## Pairwise comparison P values

|  | P-score (fixed) | P-score (random) |
| --- | --- | --- |
| Lower-sodium oxybate | 0.8953 | 0.8673 |
| Solriamfetol | 0.7703 | 0.7586 |
| Sodium oxybate | 0.5782 | 0.5792 |
| Pitolisant | 0.508 | 0.5251 |
| Modafinil | 0.2481 | 0.2685 |
| Placebo | 0.0001 | 0.0014 |

## Forest Plot


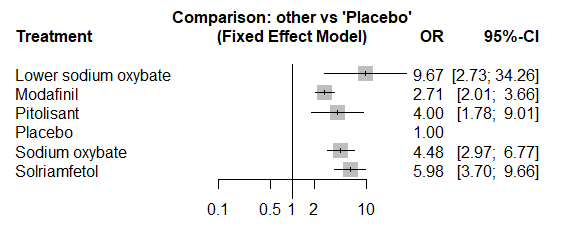


## Network Evidence Graph


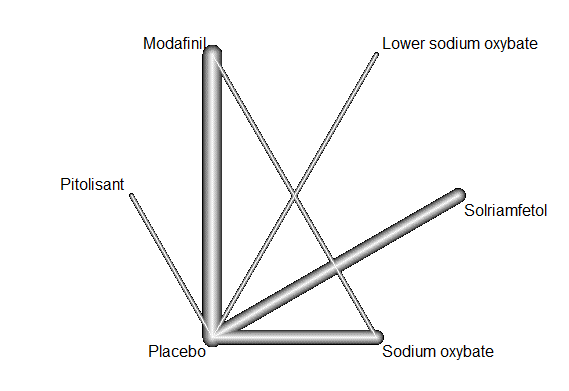


# PGI

## Pairwise effect size and adjusted standard deviation

|  | Trt 1 | Trt 2 | TE | seTE |
| --- | --- | --- | --- | --- |
| Thorpy 2019 | Placebo | Solriamfetol | -1.6471 | 0.3209 |
| Ruoff 2016 | Placebo | Solriamfetol | -3.0717 | 0.6661 |
| Bogan 2021 | LXB | Placebo | 1.5173 | 0.5379 |

## Results

### Fixed Model

|  | Trt 1 | Trt 2 | OR | 95%-CI | Q | leverage |
| --- | --- | --- | --- | --- | --- | --- |
| Thorpy 2019 | Placebo | Solriamfetol | 0.1473 | [0.0836; 0.2595] | 0.7 | 0.81 |
| Ruoff 2016 | Placebo | Solriamfetol | 0.1473 | [0.0836; 0.2595] | 3.01 | 0.19 |
| Bogan 2021 | LXB | Placebo | 4.56 | [1.5890; 13.0857] | 0 | 1 |

### Random Model

|  | Trt 1 | Trt 2 | OR | 95%-CI |
| --- | --- | --- | --- | --- |
| Thorpy 2019 | Placebo | Solriamfetol | 0.1065 | [0.0269; 0.4217] |
| Ruoff 2016 | Placebo | Solriamfetol | 0.1065 | [0.0269; 0.4217] |
| Bogan 2021 | LXB | Placebo | 4.56 | [0.6234; 33.3533] |

## Tests

Number of studies: k = 3

Number of treatments: n = 3

Number of pairwise comparisons: m = 3

Number of designs: d = 2

Quantifying heterogeneity / inconsistency:

tau^2 = 0.7414; tau = 0.8611; I^2 = 73.1% [0.0%; 93.9%]

Tests of heterogeneity (within designs) and inconsistency (between designs):

|  | Q | df | p-value |
| --- | --- | --- | --- |
| Total | 3.71 | 1 | 0.054 |
| Within designs | 3.71 | 1 | 0.054 |
| Between designs | 0 | 0 |  |

Q statistics to assess homogeneity / consistency

|  | Q | df | p-value |
| --- | --- | --- | --- |
| Total | 3.71 | 1 | 0.054 |
| Within designs | 3.71 | 1 | 0.054 |
| Between designs | 0 | 0 |  |

## Pairwise Comparisons: Fixed-effects model

|  | LXB | Placebo | Solriamfetol |
| --- | --- | --- | --- |
| LXB | . | 4.56 | 0.6715 |
| Placebo | 0.2193 | . | 0.1473 |
| Solriamfetol | 1.4891 | 6.7904 | . |

### Lower 95%-confidence limit

|  | LXB | Placebo | Solriamfetol |
| --- | --- | --- | --- |
| LXB | . | 1.589 | 0.2029 |
| Placebo | 0.0764 | . | 0.0836 |
| Solriamfetol | 0.4499 | 3.8529 | . |

### Upper 95%-confidence limit

|  | LXB | Placebo | Solriamfetol |
| --- | --- | --- | --- |
| LXB | . | 13.0857 | 2.2226 |
| Placebo | 0.6293 | . | 0.2595 |
| Solriamfetol | 4.9285 | 11.9674 | . |

## Pairwise Comparisons: Random-effects model

|  | LXB | Placebo | Solriamfetol |
| --- | --- | --- | --- |
| LXB | . | 4.56 | 0.4855 |
| Placebo | 0.2193 | . | 0.1065 |
| Solriamfetol | 2.0596 | 9.3918 | . |

### Lower 95%-confidence limit

|  | LXB | Placebo | Solriamfetol |
| --- | --- | --- | --- |
| LXB | . | 0.6234 | 0.0432 |
| Placebo | 0.03 | . | 0.0269 |
| Solriamfetol | 0.1833 | 2.3716 | . |

### Upper 95%-confidence limit

|  | LXB | Placebo | Solriamfetol |
| --- | --- | --- | --- |
| LXB | . | 33.3533 | 5.457 |
| Placebo | 1.604 | . | 0.4217 |
| Solriamfetol | 23.1487 | 37.193 | . |

## Pairwise comparison P values

|  | P-score (fixed) | P-score (random) |
| --- | --- | --- |
| Solriamfetol | 0.8714 | 0.8601 |
| LXB | 0.6274 | 0.6058 |
| Placebo | 0.0012 | 0.0341 |

## Forest Plot


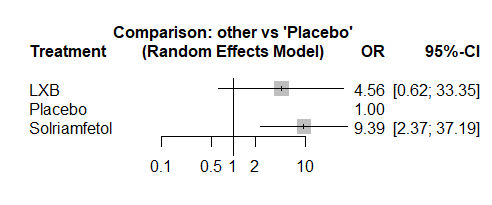


## Network Evidence Graph


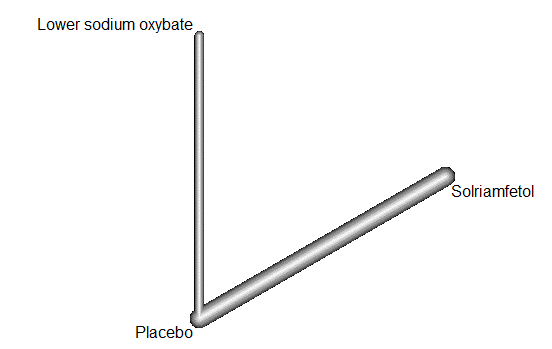


**SAFETY**

# Overall AE incidence

## Pairwise effect size and adjusted standard deviation

|  | Trt1 | Trt2 | TE | seTE | seTE.adj |
| --- | --- | --- | --- | --- | --- |
| Black 2006 | Placebo | Sodium oxybate | 0.1542 | 0.1047 | 0.1196 |
| Black 2006 | Modafinil | Sodium oxybate | -0.1054 | 0.1232 | 0.1686 |
| Black 2006 | Modafinil | Placebo | -0.2595 | 0.1132 | 0.1352 |
| Thorpy 2019 | Placebo | Solriamfetol | -0.3909 | 0.1282 | 0.1282 |
| Ruoff 2016 | Placebo | Solriamfetol | -0.3292 | 0.0956 | 0.0956 |
| Bogan 2015 | Placebo | Solriamfetol | -0.4055 | 0.1886 | 0.1886 |
| Szakacs 2017 | Pitolisant | Placebo | 0.1214 | 0.2021 | 0.2021 |
| Bogan 2021 | Lower-sodium oxybate | Placebo | -0.5819 | 0.2491 | 0.2491 |
| Broughton 1997 | Modafinil | Placebo | 1.2083 | 0.191 | 0.191 |
| Harsh 1997 | Modafinil | Placebo | 1.1838 | 0.2727 | 0.2727 |
| MDF-1998 | Modafinil | Placebo | 0.2013 | 0.0915 | 0.0915 |
| US MDF 2000 | Modafinil | Placebo | 0.1683 | 0.1018 | 0.1018 |
| Dauvilliers 2013 | Modafinil | Placebo | 0.9163 | 0.1979 | 0.2487 |
| Dauvilliers 2013 | Modafinil | Pitolisant | 0.2085 | 0.1557 | 0.1714 |
| Dauvilliers 2013 | Pitolisant | Placebo | 0.7077 | 0.2047 | 0.2784 |
| The U.S Xyrem 2002 | Placebo | Sodium oxybate | -1.1075 | 0.1462 | 0.1462 |
| Moldofsky 2000 | Modafinil | Placebo | 0 | 0.3232 | 0.3232 |

## Results

### Fixed model

|  | Trt 1 | Trt 2 | RR | 95%-CI Q | | |  | | leverage |
| --- | --- | --- | --- | --- | --- | --- | --- | --- | --- |
| Black 2006 | Placebo | Sodium oxybate | 0.6984 | [0.5947; | 0.8201] | 18.41 | | . | |
| Black 2006 | Modafinil | Sodium oxybate | 0.9219 | [0.7725; | 1.1001] | 0.02 | | . | |
| Black 2006 | Modafinil | Placebo | 1.32 | [1.1941; | 1.4592] | 15.78 | | . | |
| Thorpy 2019 | Placebo | Solriamfetol | 0.6984 | [0.6077; | 0.8027] | 0.06 | | 0.31 | |
| Ruoff 2016 | Placebo | Solriamfetol | 0.6984 | [0.6077; | 0.8027] | 0.1 | | 0.55 | |
| Bogan 2015 | Placebo | Solriamfetol | 0.6984 | [0.6077; | 0.8027] | 0.06 | | 0.14 | |
| Szakacs 2017 | Pitolisant | Placebo | 1.2243 | [0.9662; | 1.5513] | 0.16 | | 0.36 | |
| Bogan 2021 | Lower-sodium oxybate | Placebo | 0.5588 | [0.3430; | 0.9105] | 0 | | 1 | |
| Broughton 1997 | Modafinil | Placebo | 1.32 | [1.1941; | 1.4592] | 23.75 | | 0.07 | |
| Harsh 1997 | Modafinil | Placebo | 1.32 | [1.1941; | 1.4592] | 11.04 | | 0.04 | |
| USMDF 1998 | Modafinil | Placebo | 1.32 | [1.1941; | 1.4592] | 0.7 | | 0.31 | |
| US MDF 2000 | Modafinil | Placebo | 1.32 | [1.1941; | 1.4592] | 1.15 | | 0.25 | |
| Dauvilliers 2013 | Modafinil | Placebo | 1.32 | [1.1941; | 1.4592] | 6.6 | | . | |
| Dauvilliers 2013 | Modafinil | Pitolisant | 1.0782 | [0.8501; | 1.3676] | 0.6 | | . | |
| Dauvilliers 2013 | Pitolisant | Placebo | 1.2243 | [0.9662; | 1.5513] | 3.3 | | . | |
| U.S Xyrem 2002 | Placebo | Sodium oxybate | 0.6984 | [0.5947; | 0.8201] | 26.21 | | 0.31 | |
| Moldofsky 2000 | Modafinil | Placebo | 1.32 | [1.1941; | 1.4592] | 0.74 | | 0.03 | |

### Random model

|  | Trt1 | Trt1 | RR | 95%-CI | |
| --- | --- | --- | --- | --- | --- |
| Black, 2006 | Placebo | Sodium oxybate | 0.5553 | [0.3024; | 1.0200] | |
| Black, 2006 | Modafinil | Sodium oxybate | 0.9063 | [0.4727; | 1.7375] | |
| Black, 2006 | Modafinil | Placebo | 1.632 | [1.1456; | 2.3248] | |
| Thorpy 2019 | Placebo | Solriamfetol | 0.6881 | [0.4039; | 1.1722] | |
| Ruoff 2016 | Placebo | Solriamfetol | 0.6881 | [0.4039; | 1.1722] | |
| Bogan 2015 | Placebo | Solriamfetol | 0.6881 | [0.4039; | 1.1722] | |
| Szakacs 2017 | Pitolisant | Placebo | 1.3901 | [0.7375; | 2.6204] | |
| Bogan 2021 | Lower-sodium oxybate | Placebo | 0.5588 | [0.2042; | 1.5293] | |
| Broughton 1997 | Modafinil | Placebo | 1.632 | [1.1456; | 2.3248] | |
| Harsh J.R 1997 | Modafinil | Placebo | 1.632 | [1.1456; | 2.3248] | |
| MDF-1998 | Modafinil | Placebo | 1.632 | [1.1456; | 2.3248] | |
| US MDF 2000 | Modafinil | Placebo | 1.632 | [1.1456; | 2.3248] | |
| Dauvilliers 2013 | Modafinil | Placebo | 1.632 | [1.1456; | 2.3248] | |
| Dauvilliers 2013 | Modafinil | Pitolisant | 1.174 | [0.6007; | 2.2941] | |
| Dauvilliers 2013 | Pitolisant | Placebo | 1.3901 | [0.7375; | 2.6204] | |
| The U.S Xyrem 2002 | Placebo | Sodium oxybate | 0.5553 | [0.3024; | 1.0200] | |
| Moldofsky H 2000 | Modafinil | Placebo | 1.632 | [1.1456; | 2.3248] | |

## Tests

| Number of studies: k = 13 |
| --- |
| Number of treatments: n = 6 |
| Number of pairwise comparisons: m = 17 |
| Number of designs: d = 7 |

Quantifying heterogeneity / inconsistency:

tau^2 = 0.2018; tau = 0.4492; I^2 = 90.8% [85.6%; 94.1%]

Tests of heterogeneity (within designs) and inconsistency (between designs):

|  | Q | df | p-value |
| --- | --- | --- | --- |
| Total | 108.68 | 10 | < 0.0001 |
| Within designs | 36.71 | 6 | < 0.0001 |
| Between designs | 71.97 | 4 | < 0.0001 |

## Pairwise comparisons-fixed model

|  | Lower-sodium oxybate | Modafinil | Pitolisant | Placebo | Sodium oxybate | Solriamfetol |
| --- | --- | --- | --- | --- | --- | --- |
| Lower-sodium oxybate | . | 0.4233 | 0.4565 | 0.5588 | 0.3903 | 0.3903 |
| Modafinil | 2.3622 | . | 1.0782 | 1.32 | 0.9219 | 0.9219 |
| Pitolisant | 2.1908 | 0.9275 | . | 1.2243 | 0.855 | 0.8551 |
| Placebo | 1.7895 | 0.7576 | 0.8168 | . | 0.6984 | 0.6984 |
| Sodium oxybate | 2.5624 | 1.0848 | 1.1696 | 1.4319 | . | 1.0001 |
| Solriamfetol | 2.5621 | 1.0847 | 1.1695 | 1.4318 | 0.9999 | . |

### Lower 95% confidence limit

|  | Lower-sodium oxybate | Modafinil | Pitolisant | Placebo | Sodium oxybate | Solriamfetol |
| --- | --- | --- | --- | --- | --- | --- |
| Lower-sodium oxybate | . | 0.2572 | 0.2653 | 0.343 | 0.2334 | 0.2349 |
| Modafinil | 1.435 | . | 0.8501 | 1.1941 | 0.7725 | 0.7766 |
| Pitolisant | 1.2734 | 0.7312 | . | 0.9662 | 0.6447 | 0.6497 |
| Placebo | 1.0983 | 0.6853 | 0.6446 | . | 0.5947 | 0.6077 |
| Sodium oxybate | 1.5326 | 0.909 | 0.882 | 1.2193 | . | 0.8085 |
| Solriamfetol | 1.5422 | 0.9137 | 0.8886 | 1.2457 | 0.8084 | . |

### Upper 95% confidence limit

|  | Lower-sodium oxybate | Modafinil | Pitolisant | Placebo | Sodium oxybate | Solriamfetol |
| --- | --- | --- | --- | --- | --- | --- |
| Lower-sodium oxybate | . | 0.6968 | 0.7853 | 0.9105 | 0.6525 | 0.6484 |
| Modafinil | 3.8882 | . | 1.3676 | 1.4592 | 1.1001 | 1.0945 |
| Pitolisant | 3.7691 | 1.1764 | . | 1.5513 | 1.1338 | 1.1253 |
| Placebo | 2.9157 | 0.8374 | 1.035 | . | 0.8201 | 0.8027 |
| Sodium oxybate | 4.2841 | 1.2944 | 1.551 | 1.6816 | . | 1.237 |
| Solriamfetol | 4.2567 | 1.2876 | 1.5391 | 1.6456 | 1.2368 | . |

## Pairwise comparisons-random model

|  | Lower-sodium oxybate | Modafinil | Pitolisant | Placebo | Sodium oxybate | Solriamfetol |
| --- | --- | --- | --- | --- | --- | --- |
| Lower-sodium oxybate | . | 0.3424 | 0.402 | 0.5588 | 0.3103 | 0.3845 |
| Modafinil | 2.9203 | . | 1.174 | 1.632 | 0.9063 | 1.123 |
| Pitolisant | 2.4876 | 0.8518 | . | 1.3901 | 0.772 | 0.9566 |
| Placebo | 1.7895 | 0.6128 | 0.7194 | . | 0.5553 | 0.6881 |
| Sodium oxybate | 3.2223 | 1.1034 | 1.2953 | 1.8007 | . | 1.2391 |
| Solriamfetol | 2.6006 | 0.8905 | 1.0454 | 1.4533 | 0.807 | . |

### Lower 95% confidence limit

|  | Lower sodium oxybate | Modafinil | Pitolisant | Placebo | Sodium oxybate | Solriamfetol |
| --- | --- | --- | --- | --- | --- | --- |
| Lower-sodium oxybate | . | 0.1178 | 0.1223 | 0.2042 | 0.0957 | 0.1231 |
| Modafinil | 1.0046 | . | 0.6007 | 1.1456 | 0.4727 | 0.5924 |
| Pitolisant | 0.757 | 0.4359 | . | 0.7375 | 0.3249 | 0.4179 |
| Placebo | 0.6539 | 0.4302 | 0.3816 | . | 0.3024 | 0.4039 |
| Sodium oxybate | 0.9941 | 0.5756 | 0.5451 | 0.9804 | . | 0.5521 |
| Solriamfetol | 0.8326 | 0.4698 | 0.4568 | 0.8531 | 0.3596 | . |

### Upper 95% confidence limit

|  | Lower-sodium oxybate | Modafinil | Pitolisant | Placebo | Sodium oxybate | Solriamfetol |
| --- | --- | --- | --- | --- | --- | --- |
| Lower-sodium oxybate | . | 0.9954 | 1.3209 | 1.5293 | 1.006 | 1.2011 |
| Modafinil | 8.489 | . | 2.2941 | 2.3248 | 1.7375 | 2.1286 |
| Pitolisant | 8.1742 | 1.6646 | . | 2.6204 | 1.8345 | 2.1894 |
| Placebo | 4.897 | 0.8729 | 1.3559 | . | 1.02 | 1.1722 |
| Sodium oxybate | 10.4453 | 2.1154 | 3.0782 | 3.3074 | . | 2.7807 |
| Solriamfetol | 8.1228 | 1.688 | 2.3927 | 2.4757 | 1.8111 | . |

## P scores

|  | P-score (fixed) | P-score (random) |
| --- | --- | --- |
| Lower-sodium oxybate | 0.9975 | 0.9409 |
| Placebo | 0.7926 | 0.7715 |
| Pitolisant | 0.5023 | 0.4329 |
| Solriamfetol | 0.1618 | 0.386 |
| Modafinil | 0.3815 | 0.265 |
| Sodium oxybate | 0.1643 | 0.2037 |

## Forest plot


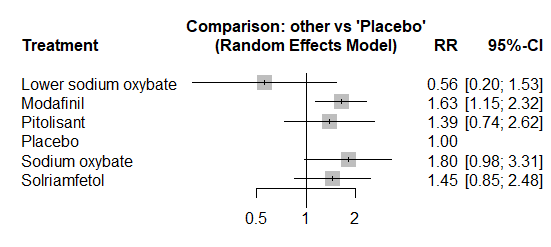


## Network evidence


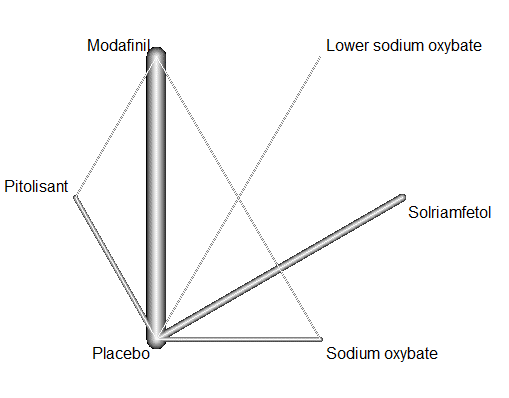


# Serious adverse events

## Pairwise effect size and adjusted standard deviation

|  | Trt 1 | Trt2 | TE | seTE | seTE.adj |
| --- | --- | --- | --- | --- | --- |
| Harsh J.R 1997 | Modafinil | Placebo | 1.6094 | 1.5428 | 1.5428 |
| Dauvilliers 2013 | Pitolisant | Placebo | 1.9459 | 1.5053 | 3.5104 |
| Dauvilliers 2013 | Modafinil | Pitolisant | 1.4881 | 0.5747 | 0.5813 |
| Dauvilliers 2013 | Modafinil | Placebo | 3.434 | 1.4299 | 1.5615 |
| The U.S Xyrem 2002 | Placebo | Sodium oxybate | -1.9459 | 1.5053 | 1.5053 |
| Xyrem 2005 | Placebo | Sodium oxybate | 0.9163 | 0.8246 | 0.8246 |
| Thorpy 2019 | Placebo | Solriamfetol | -1.0986 | 1.6269 | 1.6269 |
| Ruoff 2016 | Placebo | Solriamfetol | -2.3979 | 1.4703 | 1.4703 |
| Szakacs 2017 | Pitolisant | Placebo | 1.6094 | 1.5428 | 1.5428 |
| Bogan 2021 | Lower-sodium oxybate | Placebo | -1.0986 | 0.6515 | 0.6515 |

## Results

### Fixed Model

|  | Trt1 | Trt2 | RR | 95%-CI | Q | Leverage |
| --- | --- | --- | --- | --- | --- | --- |
| Harsh J.R 1997 | Modafinil | Placebo | 15.3183 | [2.6704; 87.8698] | 0.53 | 0.33 |
| Dauvilliers 2013 | Pitolisant | Placebo | 3.6775 | [0.5911; 22.8780] | 0.03 | . |
| Dauvilliers 2013 | Modafinil | Pitolisant | 4.1654 | [1.4096; 12.3090] | 0.01 | . |
| Dauvilliers 2013 | Modafinil | Placebo | 15.3183 | [2.6704; 87.8698] | 0.2 | . |
| The U.S Xyrem 2002 | Placebo | Sodium oxybate | 1.2912 | [0.3129; 5.3284] | 2.14 | 0.23 |
| Xyrem 2005 | Placebo | Sodium oxybate | 1.2912 | [0.3129; 5.3284] | 0.64 | 0.77 |
| Thorpy 2019 | Placebo | Solriamfetol | 0.163 | [0.0192; 1.3830] | 0.19 | 0.45 |
| Ruoff 2016 | Placebo | Solriamfetol | 0.163 | [0.0192; 1.3830] | 0.16 | 0.55 |
| Szakacs 2017 | Pitolisant | Placebo | 3.6775 | [0.5911; 22.8780] | 0.04 | 0.37 |
| Bogan 2021 | Lower-sodium oxybate | Placebo | 0.3333 | [0.0930; 1.1952] | 0 | 1 |

### Random Model

|  | Trt 1 | Trt2 | RR | 95%-CI |  |  |
| --- | --- | --- | --- | --- | --- | --- |
| Harsh J.R 1997 | Modafinil | Placebo | 15.3183 | [2.6704; 87.8698] | |  |
| Dauvilliers 2013 | Pitolisant | Placebo | 3.6775 | [0.5911; 22.8780] | |  |
| Dauvilliers 2013 | Modafinil | Pitolisant | 4.1654 | [1.4096; 12.3090] | |  |
| Dauvilliers 2013 | Modafinil | Placebo | 15.3183 | [2.6704; 87.8698] | |  |
| The U.S Xyrem 2002 | Placebo | Sodium oxybate | 1.2912 | [0.3129; 5.3284] | |  |
| Xyrem 2005 | Placebo | Sodium oxybate | 1.2912 | [0.3129; 5.3284] | |  |
| Thorpy 2019 | Placebo | Solriamfetol | 0.163 | [0.0192; 1.3830] | |  |
| Ruoff 2016 | Placebo | Solriamfetol | 0.163 | [0.0192; 1.3830] | |  |
| Szakacs 2017 | Pitolisant | Placebo | 3.6775 | [0.5911; 22.8780] | |  |
| Bogan 2021 | Lower-sodium oxybate | Placebo | 0.3333 | [0.0930; 1.1952] | |  |

## Tests

| Number of studies: k = 8 |
| --- |
| Number of treatments: n = 6 |
| Number of pairwise comparisons: m = 10 |
| Number of designs: d = 6 |
| Quantifying heterogeneity / inconsistency: | |
| tau^2 = 0; tau = 0; I^2 = 0% [0.0%; 79.2%] | |

Tests heterogeneity (within designs) and inconsistency (between designs):

|  | Q | d.f | p-value |
| --- | --- | --- | --- |
| Total | 9.94 | 9 | 0.3553 |
| Within designs | 5.65 | 5 | 0.3417 |
| Between designs | 4.29 | 4 | 0.3682 |

## Pairwise Comparisons-Fixed model

|  | Lower-sodium oxybate | Modafinil | Pitolisant | Placebo | Sodium oxybate | Solriamfetol |
| --- | --- | --- | --- | --- | --- | --- |
| Lower-sodium oxybate | . | 0.0218 | 0.0906 | 0.3333 | 0.4304 | 0.0543 |
| Modafinil | 45.9549 | . | 4.1654 | 15.3183 | 19.7794 | 2.4975 |
| Pitolisant | 11.0325 | 0.2401 | . | 3.6775 | 4.7485 | 0.5996 |
| Placebo | 3 | 0.0653 | 0.2719 | . | 1.2912 | 0.163 |
| Sodium oxybate | 2.3234 | 0.0506 | 0.2106 | 0.7745 | . | 0.1263 |
| Solriamfetol | 18.4003 | 0.4004 | 1.6678 | 6.1334 | 7.9197 | . |

### Lower 95% confidence limit

|  | Lower-sodium oxybate | Modafinil | Pitolisant | Placebo | Sodium oxybate | Solriamfetol |
| --- | --- | --- | --- | --- | --- | --- |
| Lower-sodium oxybate | . | 0.0025 | 0.0097 | 0.093 | 0.0639 | 0.0045 |
| Modafinil | 5.2799 | . | 1.4096 | 2.6704 | 2.0856 | 0.1579 |
| Pitolisant | 1.1866 | 0.0812 | . | 0.5911 | 0.4699 | 0.036 |
| Placebo | 0.8367 | 0.0114 | 0.0437 | . | 0.3129 | 0.0192 |
| Sodium oxybate | 0.3448 | 0.0053 | 0.0208 | 0.1877 | . | 0.0097 |
| Solriamfetol | 1.5251 | 0.0253 | 0.1001 | 0.7231 | 0.609 | . |

### Upper 95% confidence limit

|  | Lower-sodium oxybate | Modafinil | Pitolisant | Placebo | Sodium oxybate | Solriamfetol |
| --- | --- | --- | --- | --- | --- | --- |
| Lower-sodium oxybate | . | 0.1894 | 0.8428 | 1.1952 | 2.9002 | 0.6557 |
| Modafinil | 399.9794 | . | 12.309 | 87.8698 | 187.5799 | 39.4951 |
| Pitolisant | 102.5768 | 0.7094 | . | 22.878 | 47.9882 | 9.9881 |
| Placebo | 10.7566 | 0.3745 | 1.6917 | . | 5.3284 | 1.383 |
| Sodium oxybate | 15.6554 | 0.4795 | 2.1283 | 3.1959 | . | 1.6419 |
| Solriamfetol | 221.9994 | 6.3318 | 27.7835 | 52.0278 | 102.9832 | . |

## Pairwise comparisons-Random model

|  | Lower-sodium oxybate | Modafinil | Pitolisant | Placebo | Sodium oxybate | Solriamfetol |
| --- | --- | --- | --- | --- | --- | --- |
| Lower-sodium oxybate | . | 0.0218 | 0.0906 | 0.3333 | 0.4304 | 0.0543 |
| Modafinil | 45.9549 | . | 4.1654 | 15.3183 | 19.7794 | 2.4975 |
| Pitolisant | 11.0325 | 0.2401 | . | 3.6775 | 4.7485 | 0.5996 |
| Placebo | 3 | 0.0653 | 0.2719 | . | 1.2912 | 0.163 |
| Sodium oxybate | 2.3234 | 0.0506 | 0.2106 | 0.7745 | . | 0.1263 |
| Solriamfetol | 18.4003 | 0.4004 | 1.6678 | 6.1334 | 7.9197 | . |

### Lower 95% confidence limit

|  | Lower-sodium oxybate | Modafinil | Pitolisant | Placebo | Sodium oxybate | Solriamfetol |
| --- | --- | --- | --- | --- | --- | --- |
| Lower-sodium oxybate | . | 0.0025 | 0.0097 | 0.093 | 0.0639 | 0.0045 |
| Modafinil | 5.2799 | . | 1.4096 | 2.6704 | 2.0856 | 0.1579 |
| Pitolisant | 1.1866 | 0.0812 | . | 0.5911 | 0.4699 | 0.036 |
| Placebo | 0.8367 | 0.0114 | 0.0437 | . | 0.3129 | 0.0192 |
| Sodium oxybate | 0.3448 | 0.0053 | 0.0208 | 0.1877 | . | 0.0097 |
| Solriamfetol | 1.5251 | 0.0253 | 0.1001 | 0.7231 | 0.609 | . |

### Upper 95% confidence limit

|  | Lower-sodium oxybate | Modafinil | Pitolisant | Placebo | Sodium oxybate | Solriamfetol |
| --- | --- | --- | --- | --- | --- | --- |
| Lower-sodium oxybate | . | 0.1894 | 0.8428 | 1.1952 | 2.9002 | 0.6557 |
| Modafinil | 399.9794 | . | 12.309 | 87.8698 | 187.5799 | 39.4951 |
| Pitolisant | 102.5768 | 0.7094 | . | 22.878 | 47.9882 | 9.9881 |
| Placebo | 10.7566 | 0.3745 | 1.6917 | . | 5.3284 | 1.383 |
| Sodium oxybate | 15.6554 | 0.4795 | 2.1283 | 3.1959 | . | 1.6419 |
| Solriamfetol | 221.9994 | 6.3318 | 27.7835 | 52.0278 | 102.9832 | . |

## Pairwise comparison P values

|  | P-score (fixed) | P-score (random) |
| --- | --- | --- |
| Lower-sodium oxybate | 0.9465 | 0.9465 |
| Sodium oxybate | 0.7353 | 0.7353 |
| Placebo | 0.6554 | 0.6554 |
| Pitolisant | 0.3653 | 0.3653 |
| Solriamfetol | 0.2438 | 0.2438 |
| Modafinil | 0.0538 | 0.0538 |

## Forest plot


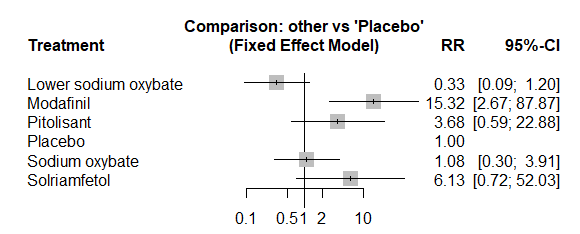


## Network evidence graph


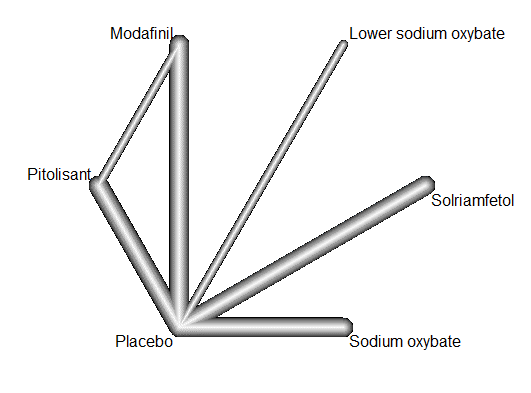


# AEs leading to discontinuation

## Pairwise effect size and adjusted standard deviation

|  | Trt1 | Trt2 | TE | seTE | seTE.adj |
| --- | --- | --- | --- | --- | --- |
| Harsh 1997 | Modafinil | Placebo | 1.0116 | 0.7589 | 0.7589 |
| Broughton 1997 | Modafinil | Placebo | 0.2877 | 0.7506 | 0.7506 |
| US MDF 1998 | Modafinil | Placebo | 2.6052 | 1.435 | 1.435 |
| US MDF 2000 | Modafinil | Placebo | 0.2877 | 0.6658 | 0.6658 |
| Dauvilliers 2013 | Pitolisant | Placebo | 0.3567 | 0.4721 | 0.6212 |
| Dauvilliers 2013 | Modafinil | Pitolisant | 0.1823 | 0.4041 | 0.4615 |
| Dauvilliers 2013 | Modafinil | Placebo | 0.539 | 0.4541 | 0.5608 |
| Black 2006 | Placebo | Sodium oxybate | -1.2528 | 0.7892 | 0.9079 |
| Black 2006 | Modafinil | Sodium oxybate | -0.8473 | 0.6754 | 0.7375 |
| Black 2006 | Modafinil | Placebo | 0.4055 | 0.9018 | 1.4163 |
| Xyrem 2005 | Placebo | Sodium oxybate | -1.8971 | 0.7153 | 0.7153 |
| Thorpy 2019 | Placebo | Solriamfetol | -0.9163 | 0.8246 | 0.8246 |
| Ruoff 2016 | Placebo | Solriamfetol | -0.5596 | 0.6106 | 0.6106 |
| Szakacs 2017 | Pitolisant | Placebo | 1.6094 | 1.5428 | 1.5428 |
| Bogan 2021 | Lower-sodium oxybate | Placebo | -2.1972 | 1.484 | 1.484 |

## Results

### Fixed Model

|  | Trt1 | Trt2 | RR | 95%-CI | Q | Leverage |
| --- | --- | --- | --- | --- | --- | --- |
| Harsh 1997 | Modafinil | Placebo | 1.9062 | [1.1052; 3.2878] | 0.23 | 0.13 |
| Broughton 1997 | Modafinil | Placebo | 1.9062 | [1.1052; 3.2878] | 0.23 | 0.14 |
| US MDF 1998 | Modafinil | Placebo | 1.9062 | [1.1052; 3.2878] | 1.87 | 0.04 |
| US MDF 2000 | Modafinil | Placebo | 1.9062 | [1.1052; 3.2878] | 0.29 | 0.17 |
| Dauvilliers 2013 | Pitolisant | Placebo | 1.6317 | [0.7478; 3.5604] | 0.05 | . |
| Dauvilliers 2013 | Modafinil | Pitolisant | 1.1682 | [0.5588; 2.4424] | 0 | . |
| Dauvilliers 2013 | Modafinil | Placebo | 1.9062 | [1.1052; 3.2878] | 0.04 | . |
| Black 2006 | Placebo | Sodium oxybate | 0.2035 | [0.0828; 0.4997] | 0.14 | . |
| Black 2006 | Modafinil | Sodium oxybate | 0.3878 | [0.1513; 0.9942] | 0.02 | . |
| Black 2006 | Modafinil | Placebo | 1.9062 | [1.1052; 3.2878] | 0.03 | . |
| Xyrem 2005 | Placebo | Sodium oxybate | 0.2035 | [0.0828; 0.4997] | 0.18 | 0.41 |
| Thorpy 2019 | Placebo | Solriamfetol | 0.5036 | [0.1925; 1.3177] | 0.08 | 0.35 |
| Ruoff 2016 | Placebo | Solriamfetol | 0.5036 | [0.1925; 1.3177] | 0.04 | 0.65 |
| Szakacs 2017 | Pitolisant | Placebo | 1.6317 | [0.7478; 3.5604] | 0.53 | 0.07 |
| Bogan 2021 | Lower-sodium oxybate | Placebo | 0.1111 | [0.0061; 2.0369] | 0 | 1 |

### Random Model

|  | Trt1 | Trt2 | RR | 95%-CI |
| --- | --- | --- | --- | --- |
| Harsh 1997 | Modafinil | Placebo | 1.9062 | [1.1052; 3.2878] |
| Broughton 1997 | Modafinil | Placebo | 1.9062 | [1.1052; 3.2878] |
| US MDF 1998 | Modafinil | Placebo | 1.9062 | [1.1052; 3.2878] |
| US MDF 2000 | Modafinil | Placebo | 1.9062 | [1.1052; 3.2878] |
| Dauvilliers 2013 | Pitolisant | Placebo | 1.6317 | [0.7478; 3.5604] |
| Dauvilliers 2013 | Modafinil | Pitolisant | 1.1682 | [0.5588; 2.4424] |
| Dauvilliers 2013 | Modafinil | Placebo | 1.9062 | [1.1052; 3.2878] |
| Black 2006 | Placebo | Sodium oxybate | 0.2035 | [0.0828; 0.4997] |
| Black 2006 | Modafinil | Sodium oxybate | 0.3878 | [0.1513; 0.9942] |
| Black 2006 | Modafinil | Placebo | 1.9062 | [1.1052; 3.2878] |
| Xyrem 2005 | Placebo | Sodium oxybate | 0.2035 | [0.0828; 0.4997] |
| Thorpy 2019 | Placebo | Solriamfetol | 0.5036 | [0.1925; 1.3177] |
| Ruoff 2016 | Placebo | Solriamfetol | 0.5036 | [0.1925; 1.3177] |
| Szakacs 2017 | Pitolisant | Placebo | 1.6317 | [0.7478; 3.5604] |
| Bogan 2021 | Lower-sodium oxybate | Placebo | 0.1111 | [0.0061; 2.0369] |

## Tests

Number of studies: k = 11

Number of treatments: n = 6

Number of pairwise comparisons: m = 15

Number of designs: d = 7

Quantifying heterogeneity / inconsistency:

tau^2 = 0; tau = 0; I^2 = 0% [0.0%; 64.8%]

Tests of heterogeneity (within designs) and inconsistency (between designs):

|  | Q | df | p-value |
| --- | --- | --- | --- |
| Total | 3.72 | 8 | 0.8819 |
| Within designs | 2.73 | 4 | 0.6037 |
| Between designs | 0.98 | 4 | 0.9122 |

## Pairwise Comparisons: Fixed-effects model

|  | Lower-sodium oxybate | Modafinil | Pitolisant | Placebo | Sodium oxybate | Solriamfetol |
| --- | --- | --- | --- | --- | --- | --- |
| Lower-sodium oxybate | . | 0.0583 | 0.0681 | 0.1111 | 0.0226 | 0.056 |
| Modafinil | 17.1562 | . | 1.1682 | 1.9062 | 0.3878 | 0.96 |
| Pitolisant | 14.6855 | 0.856 | . | 1.6317 | 0.332 | 0.8218 |
| Placebo | 9 | 0.5246 | 0.6128 | . | 0.2035 | 0.5036 |
| Sodium oxybate | 44.2367 | 2.5785 | 3.0123 | 4.9152 | . | 2.4754 |
| Solriamfetol | 17.8705 | 1.0416 | 1.2169 | 1.9856 | 0.404 | . |

### Lower 95%-confidence limit

|  | Lower-sodium oxybate | Modafinil | Pitolisant | Placebo | Sodium oxybate | Solriamfetol |
| --- | --- | --- | --- | --- | --- | --- |
| Lower-sodium oxybate | . | 0.003 | 0.0034 | 0.0061 | 0.0011 | 0.0026 |
| Modafinil | 0.8897 | . | 0.5588 | 1.1052 | 0.1513 | 0.3178 |
| Pitolisant | 0.7228 | 0.4094 | . | 0.7478 | 0.1069 | 0.2382 |
| Placebo | 0.491 | 0.3042 | 0.2809 | . | 0.0828 | 0.1925 |
| Sodium oxybate | 2.1071 | 1.0058 | 0.9704 | 2.0013 | . | 0.6638 |
| Solriamfetol | 0.835 | 0.3448 | 0.3527 | 0.7589 | 0.1083 | . |

### Upper 95%-confidence limit

|  | Lower-sodium oxybate | Modafinil | Pitolisant | Placebo | Sodium oxybate | Solriamfetol |
| --- | --- | --- | --- | --- | --- | --- |
| Lower-sodium oxybate | . | 1.124 | 1.3835 | 2.0369 | 0.4746 | 1.1977 |
| Modafinil | 330.8352 | . | 2.4424 | 3.2878 | 0.9942 | 2.9001 |
| Pitolisant | 298.3667 | 1.7896 | . | 3.5604 | 1.0305 | 2.8354 |
| Placebo | 164.985 | 0.9048 | 1.3372 | . | 0.4997 | 1.3177 |
| Sodium oxybate | 928.7253 | 6.6101 | 9.3509 | 12.0718 | . | 9.2316 |
| Solriamfetol | 382.4818 | 3.1466 | 4.1987 | 5.1952 | 1.5066 | . |

## Pairwise Comparisons: Random-effects model

|  | Lower-sodium oxybate | Modafinil | Pitolisant | Placebo | Sodium oxybate | Solriamfetol |
| --- | --- | --- | --- | --- | --- | --- |
| Lower-sodium oxybate | . | 0.0583 | 0.0681 | 0.1111 | 0.0226 | 0.056 |
| Modafinil | 17.1562 | . | 1.1682 | 1.9062 | 0.3878 | 0.96 |
| Pitolisant | 14.6855 | 0.856 | . | 1.6317 | 0.332 | 0.8218 |
| Placebo | 9 | 0.5246 | 0.6128 | . | 0.2035 | 0.5036 |
| Sodium oxybate | 44.2367 | 2.5785 | 3.0123 | 4.9152 | . | 2.4754 |
| Solriamfetol | 17.8705 | 1.0416 | 1.2169 | 1.9856 | 0.404 | . |

### Lower 95%-confidence limit

|  | Lower-sodium oxybate | Modafinil | Pitolisant | Placebo | Sodium oxybate | Solriamfetol |
| --- | --- | --- | --- | --- | --- | --- |
| Lower-sodium oxybate | . | 0.003 | 0.0034 | 0.0061 | 0.0011 | 0.0026 |
| Modafinil | 0.8897 | . | 0.5588 | 1.1052 | 0.1513 | 0.3178 |
| Pitolisant | 0.7228 | 0.4094 | . | 0.7478 | 0.1069 | 0.2382 |
| Placebo | 0.491 | 0.3042 | 0.2809 | . | 0.0828 | 0.1925 |
| Sodium oxybate | 2.1071 | 1.0058 | 0.9704 | 2.0013 | . | 0.6638 |
| Solriamfetol | 0.835 | 0.3448 | 0.3527 | 0.7589 | 0.1083 | . |

### Upper 95%-confidence limit

|  | Lower-sodium oxybate | Modafinil | Pitolisant | Placebo | Sodium oxybate | Solriamfetol |
| --- | --- | --- | --- | --- | --- | --- |
| Lower-sodium oxybate | . | 1.124 | 1.3835 | 2.0369 | 0.4746 | 1.1977 |
| Modafinil | 330.8352 | . | 2.4424 | 3.2878 | 0.9942 | 2.9001 |
| Pitolisant | 298.3667 | 1.7896 | . | 3.5604 | 1.0305 | 2.8354 |
| Placebo | 164.985 | 0.9048 | 1.3372 | . | 0.4997 | 1.3177 |
| Sodium oxybate | 928.7253 | 6.6101 | 9.3509 | 12.0718 | . | 9.2316 |
| Solriamfetol | 382.4818 | 3.1466 | 4.1987 | 5.1952 | 1.5066 | . |

## Pairwise comparison P values

|  | P-score (fixed) | P-score (random) |
| --- | --- | --- |
| Lower-sodium oxybate | 0.9641 | 0.9641 |
| Placebo | 0.7737 | 0.7737 |
| Pitolisant | 0.4807 | 0.4807 |
| Modafinil | 0.3769 | 0.3769 |
| Solriamfetol | 0.3749 | 0.3749 |
| Sodium oxybate | 0.0297 | 0.0297 |

## Forest Plot


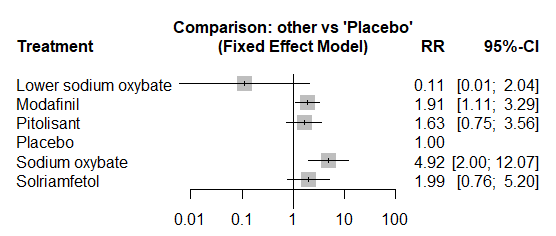


## Network Evidence Graph


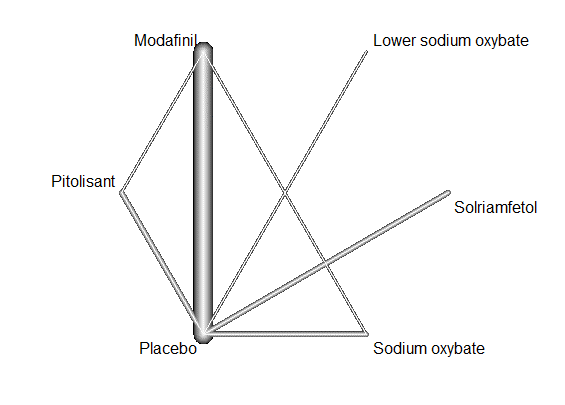


# All-cause discontinuation

## Pairwise effect size and adjusted standard deviation

|  | Trt1 | Trt2 | TE | SE(TE) | SE(TE).adj |
| --- | --- | --- | --- | --- | --- |
| Harsh J.R 1997 | Modafinil | Placebo | 0.3814 | 0.2843 | 0.2843 |
| Broughton 1997 | Modafinil | Placebo | 0.2877 | 0.7506 | 0.7506 |
| US MDF; 1998 | Modafinil | Placebo | 0.5878 | 0.4905 | 0.4905 |
| US MDF 2000 | Modafinil | Placebo | -0.1335 | 0.3405 | 0.3405 |
| Dauvilliers 2013 | Pitolisant | Placebo | -0.0606 | 0.3183 | 0.3828 |
| Dauvilliers 2013 | Modafinil | Pitolisant | -0.0645 | 0.3304 | 0.4124 |
| Dauvilliers 2013 | Modafinil | Placebo | -0.1252 | 0.3248 | 0.3977 |
| Black 2006 | Placebo | Sodium oxybate | -1.2528 | 0.7892 | 0.9079 |
| Black 2006 | Modafinil | Sodium oxybate | -0.8473 | 0.6754 | 0.7375 |
| Black 2006 | Modafinil | Placebo | 0.4055 | 0.9018 | 1.4163 |
| Xyrem 2005 | Placebo | Sodium oxybate | -1.7918 | 0.7506 | 0.7506 |
| Thorpy 2019 | Placebo | Solriamfetol | -0.5306 | 0.3726 | 0.3726 |
| Ruoff 2016 | Placebo | Solriamfetol | 0.2007 | 0.2846 | 0.2846 |
| Szakacs 2017 | Pitolisant | Placebo | -0.6931 | 0.383 | 0.383 |
| Moldofsky 2000 | Modafinil | Placebo | 1.9459 | 1.5053 | 1.5053 |
| Bogan 2021 | Lower-sodium oxybate | Placebo | -3.2189 | 1.4353 | 1.4353 |

## Results

### Fixed-effects model

|  | **Trt 1** | **Trt2** | **RR** | **95%-CI** | **Q** | **leverage** |
| --- | --- | --- | --- | --- | --- | --- |
| Harsh 1997 | Modafinil | Placebo | 1.1585 | [0.8480; 1.5829] | 0.68 | 0.31 |
| Broughton 1997 | Modafinil | Placebo | 1.1585 | [0.8480; 1.5829] | 0.04 | 0.05 |
| US MDF 1998 | Modafinil | Placebo | 1.1585 | [0.8480; 1.5829] | 0.81 | 0.11 |
| US MDF 2000 | Modafinil | Placebo | 1.1585 | [0.8480; 1.5829] | 0.68 | 0.22 |
| Dauvilliers 2013 | Pitolisant | Placebo | 0.8191 | [0.5205; 1.2891] | 0.13 | . |
| Dauvilliers 2013 | Modafinil | Pitolisant | 1.4144 | [0.8628; 2.3188] | 0.99 | . |
| Dauvilliers 2013 | Modafinil | Placebo | 1.1585 | [0.8480; 1.5829] | 0.47 | . |
| Black 2006 | Placebo | Sodium oxybate | 0.2586 | [0.1051; 0.6360] | 0.01 | . |
| Black 2006 | Modafinil | Sodium oxybate | 0.2996 | [0.1203; 0.7463] | 0.24 | . |
| Black 2006 | Modafinil | Placebo | 1.1585 | [0.8480; 1.5829] | 0.03 | . |
| Xyrem 2005 | Placebo | Sodium oxybate | 0.2586 | [0.1051; 0.6360] | 0.34 | 0.37 |
| Thorpy 2019 | Placebo | Solriamfetol | 0.9335 | [0.5992; 1.4542] | 1.54 | 0.37 |
| Ruoff 2016 | Placebo | Solriamfetol | 0.9335 | [0.5992; 1.4542] | 0.9 | 0.63 |
| Szakacs 2017 | Pitolisant | Placebo | 0.8191 | [0.5205; 1.2891] | 1.66 | 0.36 |
| Moldofsky 2000 | Modafinil | Placebo | 1.1585 | [0.8480; 1.5829] | 1.43 | 0.01 |
| Bogan 2021 | Lower-sodium oxybate | Placebo | 0.04 | [0.0024; 0.6665] | 0 | 1 |
|  |  |  |  |  |  |  |

### Random Model

|  | **Trt 1** | **Trt 2** | **RR** | **95%-CI** |  |  |
| --- | --- | --- | --- | --- | --- | --- |
| Harsh J.R 1997 | Modafinil | Placebo | 1.1652 | [0.8317; 1.6326] | |  |
| Broughton 1997 | Modafinil | Placebo | 1.1652 | [0.8317; 1.6326] | |  |
| US MDF; 1998 | Modafinil | Placebo | 1.1652 | [0.8317; 1.6326] | |  |
| US MDF 2000 | Modafinil | Placebo | 1.1652 | [0.8317; 1.6326] | |  |
| Dauvilliers 2013 | Pitolisant | Placebo | 0.8148 | [0.4993; 1.3299] | |  |
| Dauvilliers 2013 | Modafinil | Pitolisant | 1.43 | [0.8381; 2.4399] | |  |
| Dauvilliers 2013 | Modafinil | Placebo | 1.1652 | [0.8317; 1.6326] | |  |
| Black 2006 | Placebo | Sodium oxybate | 0.2575 | [0.1027; 0.6456] | |  |
| Black 2006 | Modafinil | Sodium oxybate | 0.3 | [0.1179; 0.7636] | |  |
| Black 2006 | Modafinil | Placebo | 1.1652 | [0.8317; 1.6326] | |  |
| Xyrem 2005 | Placebo | Sodium oxybate | 0.2575 | [0.1027; 0.6456] | |  |
| Thorpy 2019 | Placebo | Solriamfetol | 0.92 | [0.5659; 1.4959] | |  |
| Ruoff 2016 | Placebo | Solriamfetol | 0.92 | [0.5659; 1.4959] | |  |
| Szakacs 2017 | Pitolisant | Placebo | 0.8148 | [0.4993; 1.3299] | |  |
| Moldofsky 2000 | Modafinil | Placebo | 1.1652 | [0.8317; 1.6326] | |  |
| Bogan 2021 | Lower-sodium oxybate | Placebo | 0.04 | [0.0024; 0.6754] | |  |

## Tests

Number of studies: k = 12

Number of treatments: n = 6

Number of pairwise comparisons: m = 16

Number of designs: d = 7

Quantifying heterogeneity / inconsistency:

tau^2 = 0.0195; tau = 0.1398; I^2 = 9.5% [0.0%; 65.9%]

Tests of heterogeneity (within designs) and inconsistency (between designs):

|  | Q | d.f | p -value |
| --- | --- | --- | --- |
| Total | 9.94 | 9 | 0.3553 |
| Within designs | 5.65 | 5 | 0.3417 |
| Between designs | 4.29 | 4 | 0.3682 |

## Pairwise comparisons – Fixed model

|  | Lower-sodium oxybate | Modafinil | Pitolisant | Placebo | Sodium oxybate | Solriamfetol |
| --- | --- | --- | --- | --- | --- | --- |
| Lower-sodium oxybate | . | 0.0345 | 0.0488 | 0.04 | 0.0103 | 0.0373 |
| Modafinil | 28.9637 | . | 1.4144 | 1.1585 | 0.2996 | 1.0815 |
| Pitolisant | 20.4777 | 0.707 | . | 0.8191 | 0.2118 | 0.7646 |
| Placebo | 25 | 0.8631 | 1.2208 | . | 0.2586 | 0.9335 |
| Sodium oxybate | 96.6854 | 3.3382 | 4.7215 | 3.8674 | . | 3.6102 |
| Solriamfetol | 26.781 | 0.9246 | 1.3078 | 1.0712 | 0.277 | . |

### Lower 95% confidence limit:

|  | Lower-sodium oxybate | Modafinil | Pitolisant | Placebo | Sodium oxybate | Solriamfetol |
| --- | --- | --- | --- | --- | --- | --- |
| Lower-sodium oxybate | . | 0.002 | 0.0028 | 0.0024 | 0.0005 | 0.0022 |
| Modafinil | 1.7085 | . | 0.8628 | 0.848 | 0.1203 | 0.6289 |
| Pitolisant | 1.1852 | 0.4313 | . | 0.5205 | 0.0782 | 0.4056 |
| Placebo | 1.5004 | 0.6317 | 0.7758 | . | 0.1051 | 0.5992 |
| Sodium oxybate | 5.0423 | 1.34 | 1.7429 | 1.5724 | . | 1.3239 |
| Solriamfetol | 1.5524 | 0.5377 | 0.6936 | 0.6876 | 0.1016 | . |

### Upper 95% confidence limit:

|  | Lower-sodium oxybate | Modafinil | Pitolisant | Placebo | Sodium oxybate | Solriamfetol |
| --- | --- | --- | --- | --- | --- | --- |
| Lower-sodium oxybate | . | 0.5853 | 0.8438 | 0.6665 | 0.1983 | 0.6441 |
| Modafinil | 491.0025 | . | 2.3188 | 1.5829 | 0.7463 | 1.8599 |
| Pitolisant | 353.8227 | 1.1591 | . | 1.2891 | 0.5738 | 1.4417 |
| Placebo | 416.5562 | 1.1793 | 1.9213 | . | 0.636 | 1.4542 |
| Sodium oxybate | 1853.919 | 8.316 | 12.7908 | 9.512 | . | 9.8453 |
| Solriamfetol | 461.9947 | 1.5901 | 2.4658 | 1.6688 | 0.7554 | . |

## Pairwise comparisons – Random model

|  | Lower-sodium oxybate | Modafinil | Pitolisant | Placebo | Sodium oxybate | Solriamfetol |
| --- | --- | --- | --- | --- | --- | --- |
| Lower-sodium oxybate | . | 0.0343 | 0.0491 | 0.04 | 0.0103 | 0.0368 |
| Modafinil | 29.1305 | . | 1.43 | 1.1652 | 0.3 | 1.0721 |
| Pitolisant | 20.3709 | 0.6993 | . | 0.8148 | 0.2098 | 0.7497 |
| Placebo | 25 | 0.8582 | 1.2272 | . | 0.2575 | 0.92 |
| Sodium oxybate | 97.094 | 3.3331 | 4.7663 | 3.8838 | . | 3.5732 |
| Solriamfetol | 27.1725 | 0.9328 | 1.3339 | 1.0869 | 0.2799 | . |

### Lower 95% confidence limit:

|  | Lower-sodium oxybate | Modafinil | Pitolisant | Placebo | Sodium oxybate | Solriamfetol |
| --- | --- | --- | --- | --- | --- | --- |
| Lower-sodium oxybate | . | 0.002 | 0.0028 | 0.0024 | 0.0005 | 0.0021 |
| Modafinil | 1.6909 | . | 0.8381 | 0.8317 | 0.1179 | 0.5933 |
| Pitolisant | 1.1566 | 0.4099 | . | 0.4993 | 0.075 | 0.376 |
| Placebo | 1.4806 | 0.6125 | 0.752 | . | 0.1027 | 0.5659 |
| Sodium oxybate | 4.9704 | 1.3096 | 1.7031 | 1.5489 | . | 1.2632 |
| Solriamfetol | 1.5438 | 0.5162 | 0.669 | 0.6685 | 0.0989 | . |

### Upper 95% confidence limit:

|  | Lower-sodium oxybate | Modafinil | Pitolisant | Placebo | Sodium oxybate | Solriamfetol |
| --- | --- | --- | --- | --- | --- | --- |
| Lower-sodium oxybate | . | 0.5914 | 0.8646 | 0.6754 | 0.2012 | 0.6477 |
| Modafinil | 501.8429 | . | 2.4399 | 1.6326 | 0.7636 | 1.9371 |
| Pitolisant | 358.7748 | 1.1931 | . | 1.3299 | 0.5872 | 1.4948 |
| Placebo | 422.1368 | 1.2024 | 2.0029 | . | 0.6456 | 1.4959 |
| Sodium oxybate | 1896.67 | 8.4833 | 13.3393 | 9.738 | . | 10.1077 |
| Solriamfetol | 478.2567 | 1.6854 | 2.6596 | 1.7672 | 0.7916 | . |

## Pairwise comparison P values

|  | P-score (fixed) | P-score (random) |
| --- | --- | --- |
| Lower-sodium oxybate | 0.9891 | 0.9888 |
| Pitolisant | 0.7071 | 0.7021 |
| Placebo | 0.5294 | 0.5323 |
| Solriamfetol | 0.4402 | 0.434 |
| Modafinil | 0.3312 | 0.339 |
| Sodium oxybate | 0.003 | 0.0037 |

## Forest plot


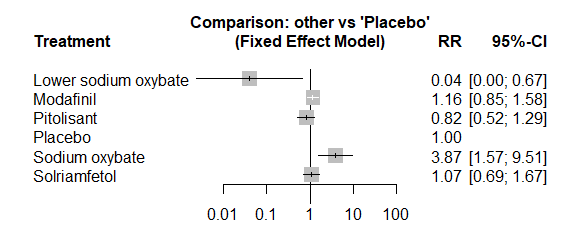


## Network Evidence Graph


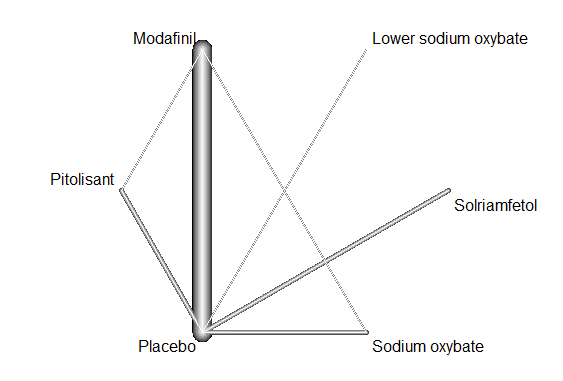


# EXPLORATORY STUDIES

# Headache

## Pairwise effect size and adjusted standard deviation

|  | Trt 1 | Trt 2 | TE | seTE | seTE.adj |
| --- | --- | --- | --- | --- | --- |
| Harsh J.R 1997 | Modafinil | Placebo | 0.6975 | 0.3926 | 0.3926 |
| US MDF; 1998 | Modafinil | Placebo | 0.358 | 0.1562 | 0.1562 |
| US MDF 2000 | Modafinil | Placebo | 0.0799 | 0.1407 | 0.1407 |
| Dauvilliers 2013 | Pitolisant | Placebo | 0.5733 | 0.4382 | 0.4993 |
| Dauvilliers 2013 | Modafinil | Pitolisant | -0.6687 | 0.4416 | 0.505 |
| Dauvilliers 2013 | Modafinil | Placebo | -0.0953 | 0.5193 | 0.7614 |
| Black 2006 | Placebo | Sodium oxybate | 0.8575 | 0.4973 | 0.584 |
| Black 2006 | Modafinil | Sodium oxybate | 0.2007 | 0.5557 | 0.8133 |
| Black 2006 | Modafinil | Placebo | -0.6568 | 0.4387 | 0.488 |
| The U.S. Xyrem 2002 | Placebo | Sodium oxybate | 0.1001 | 0.3953 | 0.3953 |
| Thorpy 2019 | Placebo | Solriamfetol | -1.4404 | 0.5806 | 0.5806 |
| Ruoff 2016 | Placebo | Solriamfetol | -0.4441 | 0.5475 | 0.5475 |
| Bogan 2015 | Placebo | Solriamfetol | -1.9459 | 1.492 | 1.492 |
| Szakacs 2017 | Pitolisant | Placebo | -0.0572 | 0.6016 | 0.6016 |
| Moldofsky 2000 | Modafinil | Placebo | 0.1643 | 0.775 | 0.775 |
| Bogan 2021 | Lower-sodium oxybate | Placebo | 1.0393 | 1.6239 | 1.6239 |

## Results

### Fixed Model

|  | Trt 1 | Trt 2 | RR |  | 95%-CI | Q | leverage |
| --- | --- | --- | --- | --- | --- | --- | --- |
| Harsh J.R 1997 | Modafinil | Placebo | 1.1955 | [0.9912; | 1.4419] | 1.75 | 0.06 |
| US MDF; 1998 | Modafinil | Placebo | 1.1955 | [0.9912; | 1.4419] | 1.32 | 0.37 |
| US MDF 2000 | Modafinil | Placebo | 1.1955 | [0.9912; | 1.4419] | 0.49 | 0.46 |
| Dauvilliers 2013 | Pitolisant | Placebo | 1.6667 | [0.9118; | 3.0468] | 0.02 | . |
| Dauvilliers 2013 | Modafinil | Pitolisant | 0.7173 | [0.3894; | 1.3213] | 0.44 | . |
| Dauvilliers 2013 | Modafinil | Placebo | 1.1955 | [0.9912; | 1.4419] | 0.13 | . |
| Black 2006 | Placebo | Sodium oxybate | 1.3418 | [0.7395; | 2.4346] | 0.93 | . |
| Black 2006 | Modafinil | Sodium oxybate | 1.6041 | [0.8658; | 2.9720] | 0.11 | . |
| Black 2006 | Modafinil | Placebo | 1.1955 | [0.9912; | 1.4419] | 2.93 | . |
| The U.S. Xyrem. 2002 | Placebo | Sodium oxybate | 1.3418 | [0.7395; | 2.4346] | 0.24 |  |
| Thorpy 2019 | Placebo | Solriamfetol | 0.3747 | [0.1762; | 0.7965] | 0.62 | 0.44 |
| Ruoff 2016 | Placebo | Solriamfetol | 0.3747 | [0.1762; | 0.7965] | 0.96 | 0.49 |
| Bogan 2015 | Placebo | Solriamfetol | 0.3747 | [0.1762; | 0.7965] | 0.42 | 0.07 |
| Szakacs 2017 | Pitolisant | Placebo | 1.6667 | [0.9118; | 3.0468] | 0.89 | 0.26 |
| Moldofsky 2000 | Modafinil | Placebo | 1.1955 | [0.9912; | 1.4419] | 0 | 0.02 |
| Bogan 2021 | Lower-sodium oxybate | Placebo | 2.8273 | [0.1173; | 68.1763] | 0 | 1 |

### Random Model

|  | Trt 1 | Trt 2 | RR |  | 95%-CI |
| --- | --- | --- | --- | --- | --- |
| Harsh J.R 1997 | Modafinil | Placebo | 1.1775 | [0.9060; | 1.5305] |
| US MDF; 1998 | Modafinil | Placebo | 1.1775 | [0.9060; | 1.5305] |
| US MDF 2000 | Modafinil | Placebo | 1.1775 | [0.9060; | 1.5305] |
| Dauvilliers 2013 | Pitolisant | Placebo | 1.6384 | [0.8577; | 3.1294] |
| Dauvilliers 2013 | Modafinil | Pitolisant | 0.7187 | [0.3708; | 1.3933] |
| Dauvilliers 2013 | Modafinil | Placebo | 1.1775 | [0.9060; | 1.5305] |
| Black 2006 | Placebo | Sodium oxybate | 1.3465 | [0.7117; | 2.5474] |
| Black 2006 | Modafinil | Sodium oxybate | 1.5856 | [0.8082; | 3.1105] |
| Black 2006 | Modafinil | Placebo | 1.1775 | [0.9060; | 1.5305] |
| The U.S. Xyrem. 2002 | Placebo | Sodium oxybate | 1.3465 | [0.7117; | 2.5474] |
| Thorpy 2019 | Placebo | Solriamfetol | 0.3721 | [0.1697; | 0.8156] |
| Ruoff 2016 | Placebo | Solriamfetol | 0.3721 | [0.1697; | 0.8156] |
| Bogan 2015 | Placebo | Solriamfetol | 0.3721 | [0.1697; | 0.8156] |
| Szakacs 2017 | Pitolisant | Placebo | 1.6384 | [0.8577; | 3.1294] |
| Moldofsky 2000 | Modafinil | Placebo | 1.1775 | [0.9060; | 1.5305] |
| Bogan 2021 | Lower-sodium oxybate | Placebo | 2.8273 | [0.1153; | 69.3284] |

## Tests

Number of studies: k = 12

Number of treatments: n = 6

Number of pairwise comparisons: m = 16

Number of designs: d = 7

Quantifying heterogeneity / inconsistency:

tau^2 = 0.0278; tau = 0.1669; I^2 = 20.1% [0.0%; 60.5%]

Tests of heterogeneity (within designs) and inconsistency (between designs):

|  | Q | df | p-value |
| --- | --- | --- | --- |
| Total | 11.26 | 9 | 0.2585 |
| Within designs | 5.24 | 5 | 0.3876 |
| Between designs | 6.02 | 4 | 0.1977 |

## Pairwise Comparisons: Fixed-effects model

|  | Lower-sodium oxybate | Modafinil | Pitolisant | Placebo | Sodium oxybate | Solriamfetol |
| --- | --- | --- | --- | --- | --- | --- |
| Lower-sodium oxybate | . | 2.365 | 1.6964 | 2.8273 | 3.7937 | 1.0593 |
| Modafinil | 0.4228 | . | 0.7173 | 1.1955 | 1.6041 | 0.4479 |
| Pitolisant | 0.5895 | 1.3942 | . | 1.6667 | 2.2364 | 0.6244 |
| Placebo | 0.3537 | 0.8365 | 0.6 | . | 1.3418 | 0.3747 |
| Sodium oxybate | 0.2636 | 0.6234 | 0.4471 | 0.7453 | . | 0.2792 |
| Solriamfetol | 0.944 | 2.2327 | 1.6014 | 2.6691 | 3.5814 | . |

### Lower 95%-confidence limit

|  | Lower-sodium oxybate | Modafinil | Pitolisant | Placebo | Sodium oxybate | Solriamfetol |
| --- | --- | --- | --- | --- | --- | --- |
| Lower-sodium oxybate | . | 0.0975 | 0.0665 | 0.1173 | 0.1489 | 0.0402 |
| Modafinil | 0.0174 | . | 0.3894 | 0.9912 | 0.8658 | 0.2059 |
| Pitolisant | 0.0231 | 0.7568 | . | 0.9118 | 0.96 | 0.2377 |
| Placebo | 0.0147 | 0.6935 | 0.3282 | . | 0.7395 | 0.1762 |
| Sodium oxybate | 0.0103 | 0.3365 | 0.1919 | 0.4107 | . | 0.1068 |
| Solriamfetol | 0.0358 | 1.0264 | 0.6096 | 1.2555 | 1.3697 | . |

### Upper 95%-confidence limit

|  | Lower-sodium oxybate | Modafinil | Pitolisant | Placebo | Sodium oxybate | Solriamfetol |
| --- | --- | --- | --- | --- | --- | --- |
| Lower-sodium oxybate | . | 57.3436 | 43.2891 | 68.1763 | 96.6792 | 27.8965 |
| Modafinil | 10.2521 | . | 1.3213 | 1.4419 | 2.972 | 0.9743 |
| Pitolisant | 15.0434 | 2.5683 | . | 3.0468 | 5.2101 | 1.6403 |
| Placebo | 8.5286 | 1.0089 | 1.0968 | . | 2.4346 | 0.7965 |
| Sodium oxybate | 6.7173 | 1.155 | 1.0417 | 1.3522 | . | 0.7301 |
| Solriamfetol | 24.8615 | 4.8568 | 4.2067 | 5.6746 | 9.3646 | . |

## Pairwise Comparisons: Random-effects model

|  | Lower-sodium oxybate | Modafinil | Pitolisant | Placebo | Sodium oxybate | Solriamfetol |
| --- | --- | --- | --- | --- | --- | --- |
| Lower-sodium oxybate | . | 2.401 | 1.7257 | 2.8273 | 3.807 | 1.052 |
| Modafinil | 0.4165 | . | 0.7187 | 1.1775 | 1.5856 | 0.4381 |
| Pitolisant | 0.5795 | 1.3913 | . | 1.6384 | 2.206 | 0.6096 |
| Placebo | 0.3537 | 0.8492 | 0.6104 | . | 1.3465 | 0.3721 |
| Sodium oxybate | 0.2627 | 0.6307 | 0.4533 | 0.7427 | . | 0.2763 |
| Solriamfetol | 0.9506 | 2.2825 | 1.6405 | 2.6877 | 3.619 | . |

### Lower 95%-confidence limit

|  | Lower-sodium oxybate | Modafinil | Pitolisant | Placebo | Sodium oxybate | Solriamfetol |
| --- | --- | --- | --- | --- | --- | --- |
| Lower-sodium oxybate | . | 0.0969 | 0.066 | 0.1153 | 0.1458 | 0.039 |
| Modafinil | 0.0168 | . | 0.3708 | 0.906 | 0.8082 | 0.1915 |
| Pitolisant | 0.0221 | 0.7177 | . | 0.8577 | 0.8931 | 0.2204 |
| Placebo | 0.0144 | 0.6534 | 0.3195 | . | 0.7117 | 0.1697 |
| Sodium oxybate | 0.0101 | 0.3215 | 0.1835 | 0.3926 | . | 0.1005 |
| Solriamfetol | 0.0353 | 0.9978 | 0.5932 | 1.2262 | 1.3166 | . |

### Upper 95%-confidence limit

|  | Lower-sodium oxybate | Modafinil | Pitolisant | Placebo | Sodium oxybate | Solriamfetol |
| --- | --- | --- | --- | --- | --- | --- |
| Lower-sodium oxybate | . | 59.5103 | 45.1484 | 69.3284 | 99.4117 | 28.3609 |
| Modafinil | 10.3226 | . | 1.3933 | 1.5305 | 3.1105 | 1.0022 |
| Pitolisant | 15.1601 | 2.6971 | . | 3.1294 | 5.4492 | 1.6858 |
| Placebo | 8.6727 | 1.1038 | 1.1659 | . | 2.5474 | 0.8156 |
| Sodium oxybate | 6.8592 | 1.2373 | 1.1197 | 1.4051 | . | 0.7595 |
| Solriamfetol | 25.6288 | 5.221 | 4.5367 | 5.8914 | 9.9477 | . |

## Pairwise comparison P values

|  | P-score (fixed) | P-score (random) |
| --- | --- | --- |
| Sodium oxybate | 0.9042 | 0.8939 |
| Placebo | 0.7642 | 0.7466 |
| Modafinil | 0.5269 | 0.543 |
| Pitolisant | 0.3357 | 0.3466 |
| Lower-sodium oxybate | 0.326 | 0.3258 |
| Solriamfetol | 0.143 | 0.1441 |

## Forest Plot


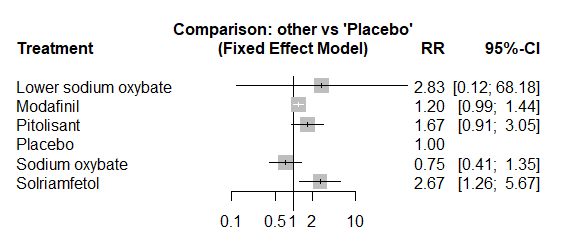


## Network Evidence Graph


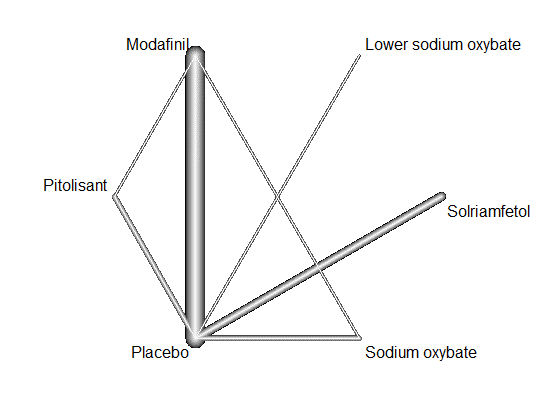


# Dizziness

## Pairwise effect size and adjusted standard deviation

|  | Trt 1 | Trt2 | TE | seTE | seTE.adj |
| --- | --- | --- | --- | --- | --- |
| Harsh J.R 1997 | Modafinil | Placebo | 1.9881 | 1.4527 | 1.4527 |
| Dauvilliers 2013 | Pitolisant | Placebo | 1.0664 | 1.6131 | 3.0158 |
| Dauvilliers 2013 | Modafinil | Pitolisant | 1.0371 | 0.9096 | 0.9431 |
| Dauvilliers 2013 | Modafinil | Placebo | 2.1034 | 1.4696 | 1.66 |
| Black 2006 | Placebo | Sodium oxybate | -0.3057 | 0.7398 | 0.8357 |
| Black 2006 | Modafinil | Sodium oxybate | -0.8289 | 0.8461 | 1.0352 |
| Black 2006 | Modafinil | Placebo | -0.5232 | 0.8942 | 1.2077 |
| The U.S. Xyrem. 2002 | Placebo | Sodium oxybate | -1.6094 | 0.7029 | 0.7029 |
| Thorpy 2019 | Placebo | Solriamfetol | 0 | 0.8025 | 0.8025 |
| Ruoff 2016 | Placebo | Solriamfetol | -1.2062 | 1.1359 | 1.1359 |
| Szakacs 2017 | Pitolisant | Placebo | -1.6661 | 1.537 | 1.537 |

## Results

### Fixed model

| Trt1 | | Trt 2 |  | RR | 95% CI | | Q | | Leverage |  |
| --- | --- | --- | --- | --- | --- | --- | --- | --- | --- | --- |
| Harsh J.R 1997 | Modafinil | Placebo | | 1.7728 | [0.5280; | 5.9518] | | 0.95 | 0.18 |
| Dauvilliers 2013 | Pitolisant | Placebo | | 0.5118 | [0.0908; | 2.8864] | | 0.33 |  |
| Dauvilliers 2013 | Modafinil | Pitolisant | | 3.4638 | [0.7196; | 16.6721] | | 0.05 |  |
| Dauvilliers 2013 | Modafinil | Placebo | | 1.7728 | [0.5280; | 5.9518] | | 0.85 |  |
| Black 2006 | Placebo | Sodium oxybate | | 0.3199 | [0.1212; | 0.8441] | | 1 |  |
| Black 2006 | Modafinil | Sodium oxybate | | 0.567 | [0.1491; | 2.1568] | | 0.06 |  |
| Black 2006 | Modafinil | Placebo | | 1.7728 | [0.5280; | 5.9518] | | 0.82 |  |
| The U.S. Xyrem. 2002 | Placebo | Sodium oxybate | | 0.3199 | [0.1212; | 0.8441] | | 0.45 | 0.5 |
| Thorpy 2019 | Placebo | Solriamfetol | | 0.6692 | [0.1852; | 2.4181] | | 0.25 | 0.67 |
| Ruoff 2016 | Placebo | Solriamfetol | | 0.6692 | [0.1852; | 2.4181] | | 0.5 | 0.33 |
| Szakacs 2017 | Pitolisant | Placebo | | 0.5118 | [0.0908; | 2.8864] | | 0.42 | 0.33 |

### Random model

|  | Trt1 | Trt2 | RR |  | 95%-CI |
| --- | --- | --- | --- | --- | --- |
| Harsh J.R 1997 | Modafinil | Placebo | 1.8322 | [0.5050; | 6.6478] |
| Dauvilliers 2013 | Pitolisant | Placebo | 0.5254 | [0.0851; | 3.2428] |
| Dauvilliers 2013 | Modafinil | Pitolisant | 3.4872 | [0.6477; | 18.7755] |
| Dauvilliers 2013 | Modafinil | Placebo | 1.8322 | [0.5050; | 6.6478] |
| Black 2006 | Placebo | Sodium oxybate | 0.3162 | [0.1060; | 0.9433] |
| Black 2006 | Modafinil | Sodium oxybate | 0.5794 | [0.1355; | 2.4783] |
| Black 2006 | Modafinil | Placebo | 1.8322 | [0.5050; | 6.6478] |
| The U.S. Xyrem. 2002 | Placebo | Sodium oxybate | 0.3162 | [0.1060; | 0.9433] |
| Thorpy 2019 | Placebo | Solriamfetol | 0.6522 | [0.1614; | 2.6348] |
| Ruoff 2016 | Placebo | Solriamfetol | 0.6522 | [0.1614; | 2.6348] |
| Szakacs 2017 | Pitolisant | Placebo | 0.5254 | [0.0851; | 3.2428] |

## Tests

| Number of studies: k = 7 |
| --- |
| Number of treatments: n = 5 |
| Number of pairwise comparisons: m = 11 |
| Number of designs: d = 6 |
| Quantifying heterogeneity / inconsistency: | |
| tau^2 = 0.1419; tau = 0.3767; I^2 = 12% [0.0%; 77.7%] | |

Tests of heterogeneity (within designs) and inconsistency (between designs):

| Q d.f. p-value |
| --- |
| Total 5.68 5 0.3385 |
| Within designs 0.75 1 0.3858 |
| Between designs 4.93 4 0.2947 |

## Pairwise comparisons-Fixed model

|  | Modafinil | Pitolisant | Placebo | Sodium oxybate | Solriamfetol |
| --- | --- | --- | --- | --- | --- |
| Modafinil | . | 3.4638 | 1.7728 | 0.567 | 1.1864 |
| Pitolisant | 0.2887 | . | 0.5118 | 0.1637 | 0.3425 |
| Placebo | 0.5641 | 1.9539 | . | 0.3199 | 0.6692 |
| Sodium oxybate | 1.7635 | 6.1084 | 3.1263 | . | 2.0922 |
| Solriamfetol | 0.8429 | 2.9196 | 1.4943 | 0.478 | . |

### Lower 95% confidence limit

|  | Modafinil | Pitolisant | Placebo | Sodium oxybate | Solriamfetol |
| --- | --- | --- | --- | --- | --- |
| Modafinil | . | 0.7196 | 0.528 | 0.1491 | 0.203 |
| Pitolisant | 0.06 | . | 0.0908 | 0.0251 | 0.0397 |
| Placebo | 0.168 | 0.3465 | . | 0.1212 | 0.1852 |
| Sodium oxybate | 0.4637 | 0.938 | 1.1847 | . | 0.4182 |
| Solriamfetol | 0.1442 | 0.3385 | 0.4135 | 0.0955 | . |

### Upper 95% confidence limit

|  | Modafinil | Pitolisant | Placebo | Sodium oxybate | Solriamfetol |
| --- | --- | --- | --- | --- | --- |
| Modafinil | . | 16.6721 | 5.9518 | 2.1568 | 6.9341 |
| Pitolisant | 1.3896 | . | 2.8864 | 1.0661 | 2.9541 |
| Placebo | 1.8938 | 11.0191 | . | 0.8441 | 2.4181 |
| Sodium oxybate | 6.7075 | 39.7806 | 8.25 | . | 10.4662 |
| Solriamfetol | 4.9266 | 25.1819 | 5.3995 | 2.391 | . |

## Pairwise comparisons-Random model

|  | Modafinil | Pitolisant | Placebo | Sodium oxybate | Solriamfetol |
| --- | --- | --- | --- | --- | --- |
| Modafinil | . | 3.4872 | 1.8322 | 0.5794 | 1.1949 |
| Pitolisant | 0.2868 | . | 0.5254 | 0.1662 | 0.3427 |
| Placebo | 0.5458 | 1.9033 | . | 0.3162 | 0.6522 |
| Sodium oxybate | 1.7259 | 6.0185 | 3.1621 | . | 2.0622 |
| Solriamfetol | 0.8369 | 2.9184 | 1.5333 | 0.4849 | . |

### Lower 95% confidence limit

|  | Modafinil | Pitolisant | Placebo | Sodium oxybate | Solriamfetol |
| --- | --- | --- | --- | --- | --- |
| Modafinil | . | 0.6477 | 0.505 | 0.1355 | 0.1787 |
| Pitolisant | 0.0533 | . | 0.0851 | 0.0223 | 0.0346 |
| Placebo | 0.1504 | 0.3084 | . | 0.106 | 0.1614 |
| Sodium oxybate | 0.4035 | 0.8088 | 1.0601 | . | 0.3502 |
| Solriamfetol | 0.1252 | 0.2944 | 0.3795 | 0.0823 | . |

### Upper 95% confidence limit

|  | Modafinil | Pitolisant | Placebo | Sodium oxybate | Solriamfetol |
| --- | --- | --- | --- | --- | --- |
| Modafinil | . | 18.7755 | 6.6478 | 2.4783 | 7.9898 |
| Pitolisant | 1.544 | . | 3.2428 | 1.2364 | 3.3969 |
| Placebo | 1.9804 | 11.7476 | . | 0.9433 | 2.6348 |
| Sodium oxybate | 7.3819 | 44.7854 | 9.4322 | . | 12.1447 |
| Solriamfetol | 5.596 | 28.9319 | 6.1945 | 2.8556 | . |

## P scores

|  | P-score (fixed) | P-score (random) |
| --- | --- | --- |
| Pitolisant | 0.8803 | 0.8658 |
| Placebo | 0.6916 | 0.693 |
| Solriamfetol | 0.4564 | 0.4538 |
| Modafinil | 0.365 | 0.3619 |
| Sodium oxybate | 0.1067 | 0.1255 |

## Forest plot


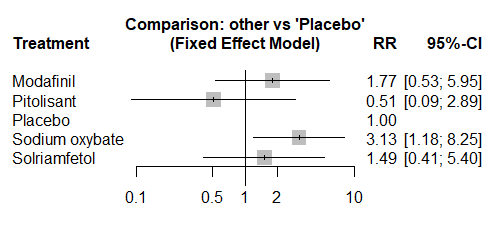


## Network graph evidence


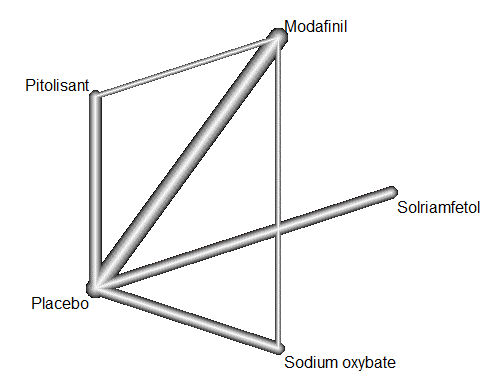


# Insomnia

## Pairwise effect size and adjusted standard deviation

|  | Trt 1 | Trt 2 | TE | seTE | seTE.adj |
| --- | --- | --- | --- | --- | --- |
| US MDF; 1998 | Modafinil | Placebo | 0.3681 | 1.1477 | 1.1477 |
| Dauvilliers 2013 | Pitolisant | Placebo | 1.7755 | 1.5061 | 1.6028 |
| Dauvilliers 2013 | Modafinil | Pitolisant | -1.8693 | 1.5071 | 1.604 |
| Dauvilliers 2013 | Modafinil | Placebo | -0.0938 | 1.9843 | 4.1 |
| Thorpy 2019 | Placebo | Solriamfetol | -1.3049 | 1.4695 | 1.4695 |
| Ruoff 2016 | Placebo | Solriamfetol | -1.0239 | 0.554 | 0.554 |
| Bogan 2015 | Placebo | Solriamfetol | -2.1972 | 1.4706 | 1.4706 |
| Bogan 2021 | Lower-sodium oxybate | Placebo | 1.5502 | 1.5396 | 1.5396 |

## Results

### Fixed Model

|  | Trt 1 | Trt 2 | RR | 95%-CI | Q | leverage |
| --- | --- | --- | --- | --- | --- | --- |
| US MDF; 1998 | Modafinil | Placebo | 1.287 | [0.1836; 9.0208] | 0.01 | 0.75 |
| Dauvilliers 2013 | Pitolisant | Placebo | 7.0177 | [0.6204; 79.3773] | 0.01 | . |
| Dauvilliers 2013 | Modafinil | Pitolisant | 0.1834 | [0.0162; 2.0756] | 0.01 | . |
| Dauvilliers 2013 | Modafinil | Placebo | 1.287 | [0.1836; 9.0208] | 0.01 | . |
| Thorpy 2019 | Placebo | Solriamfetol | 0.3058 | [0.1173; 0.7973] | 0.01 | 0.11 |
| Ruoff 2016 | Placebo | Solriamfetol | 0.3058 | [0.1173; 0.7973] | 0.08 | 0.78 |
| Bogan 2015 | Placebo | Solriamfetol | 0.3058 | [0.1173; 0.7973] | 0.47 | 0.11 |
| Bogan 2021 | Lower-sodium oxybate | Placebo | 4.7122 | [0.2305; 96.3230] | 0 | 1 |

### Random Model

|  | Trt 1 | Trt 2 | RR | 95%-CI |
| --- | --- | --- | --- | --- |
| US MDF; 1998 | Modafinil | Placebo | 1.287 | [0.1836; 9.0208] |
| Dauvilliers 2013 | Pitolisant | Placebo | 7.0177 | [0.6204; 79.3773] |
| Dauvilliers 2013 | Modafinil | Pitolisant | 0.1834 | [0.0162; 2.0756] |
| Dauvilliers 2013 | Modafinil | Placebo | 1.287 | [0.1836; 9.0208] |
| Thorpy 2019 | Placebo | Solriamfetol | 0.3058 | [0.1173; 0.7973] |
| Ruoff 2016 | Placebo | Solriamfetol | 0.3058 | [0.1173; 0.7973] |
| Bogan 2015 | Placebo | Solriamfetol | 0.3058 | [0.1173; 0.7973] |
| Bogan 2021 | Lower-sodium oxybate | Placebo | 4.7122 | [0.2305; 96.3230] |

## Tests

Number of studies: k = 6

Number of treatments: n = 5

Number of pairwise comparisons: m = 8

Number of designs: d = 4

Quantifying heterogeneity / inconsistency:

tau^2 = 0; tau = 0; I^2 = 0% [0.0%; 84.7%]

Tests of heterogeneity (within designs) and inconsistency (between designs):

Quantifying heterogeneity / inconsistency:

tau^2 = 0; tau = 0; I^2 = 0% [0.0%; 84.7%]

Tests of heterogeneity (within designs) and inconsistency (between designs):

|  | Q | df | p-value |
| --- | --- | --- | --- |
| Total | 0.61 | 3 | 0.8951 |
| Within designs | 0.57 | 2 | 0.7539 |
| Between designs | 0.04 | 1 | 0.8403 |

## Pairwise Comparisons: Fixed-effects model

|  | Lower-sodium oxybate | Modafinil | Pitolisant | Placebo | Solriamfetol |
| --- | --- | --- | --- | --- | --- |
| Lower-sodium oxybate | . | 3.6614 | 0.6715 | 4.7122 | 1.4412 |
| Modafinil | 0.2731 | . | 0.1834 | 1.287 | 0.3936 |
| Pitolisant | 1.4893 | 5.4527 | . | 7.0177 | 2.1463 |
| Placebo | 0.2122 | 0.777 | 0.1425 | . | 0.3058 |
| Solriamfetol | 0.6939 | 2.5405 | 0.4659 | 3.2697 | . |

### Lower 95%-confidence limit

|  | Lower-sodium oxybate | Modafinil | Pitolisant | Placebo | Solriamfetol |
| --- | --- | --- | --- | --- | --- |
| Lower-sodium oxybate | . | 0.1009 | 0.014 | 0.2305 | 0.0608 |
| Modafinil | 0.0075 | . | 0.0162 | 0.1836 | 0.0449 |
| Pitolisant | 0.031 | 0.4818 | . | 0.6204 | 0.1581 |
| Placebo | 0.0104 | 0.1109 | 0.0126 | . | 0.1173 |
| Solriamfetol | 0.0293 | 0.29 | 0.0343 | 1.2542 | . |

### Upper 95%-confidence limit

|  | Lower-sodium oxybate | Modafinil | Pitolisant | Placebo | Solriamfetol |
| --- | --- | --- | --- | --- | --- |
| Lower-sodium oxybate | . | 132.8341 | 32.2463 | 96.323 | 34.1749 |
| Modafinil | 9.9089 | . | 2.0756 | 9.0208 | 3.4481 |
| Pitolisant | 71.5192 | 61.7114 | . | 79.3773 | 29.1339 |
| Placebo | 4.3379 | 5.446 | 1.6118 | . | 0.7973 |
| Solriamfetol | 16.4535 | 22.2544 | 6.3242 | 8.5236 | . |

## Pairwise Comparisons: Random-effects model

|  | Lower-sodium oxybate | Modafinil | Pitolisant | Placebo | Solriamfetol |
| --- | --- | --- | --- | --- | --- |
| Lower-sodium oxybate | . | 3.6614 | 0.6715 | 4.7122 | 1.4412 |
| Modafinil | 0.2731 | . | 0.1834 | 1.287 | 0.3936 |
| Pitolisant | 1.4893 | 5.4527 | . | 7.0177 | 2.1463 |
| Placebo | 0.2122 | 0.777 | 0.1425 | . | 0.3058 |
| Solriamfetol | 0.6939 | 2.5405 | 0.4659 | 3.2697 | . |

### Lower 95%-confidence limit

|  | Lower-sodium oxybate | Modafinil | Pitolisant | Placebo | Solriamfetol |
| --- | --- | --- | --- | --- | --- |
| Lower-sodium oxybate | . | 0.1009 | 0.014 | 0.2305 | 0.0608 |
| Modafinil | 0.0075 | . | 0.0162 | 0.1836 | 0.0449 |
| Pitolisant | 0.031 | 0.4818 | . | 0.6204 | 0.1581 |
| Placebo | 0.0104 | 0.1109 | 0.0126 | . | 0.1173 |
| Solriamfetol | 0.0293 | 0.29 | 0.0343 | 1.2542 | . |

### Upper 95%-confidence limit

|  | Lower-sodium oxybate | Modafinil | Pitolisant | Placebo | Solriamfetol |
| --- | --- | --- | --- | --- | --- |
| Lower-sodium oxybate | . | 132.8341 | 32.2463 | 96.323 | 34.1749 |
| Modafinil | 9.9089 | . | 2.0756 | 9.0208 | 3.4481 |
| Pitolisant | 71.5192 | 61.7114 | . | 79.3773 | 29.1339 |
| Placebo | 4.3379 | 5.446 | 1.6118 | . | 0.7973 |
| Solriamfetol | 16.4535 | 22.2544 | 6.3242 | 8.5236 | . |

## Pairwise comparison P values

|  | P-score (fixed) | P-score (random) |
| --- | --- | --- |
| Placebo | 0.8445 | 0.8445 |
| Modafinil | 0.7188 | 0.7188 |
| Solriamfetol | 0.3785 | 0.3785 |
| Lower-sodium oxybate | 0.3467 | 0.3467 |
| Pitolisant | 0.2115 | 0.2115 |

## Forest Plot


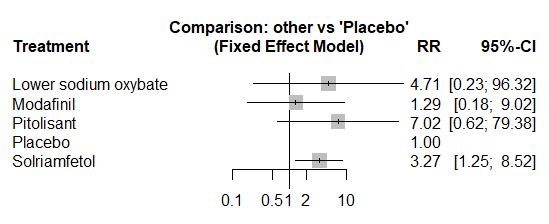


## Network Evidence Graph


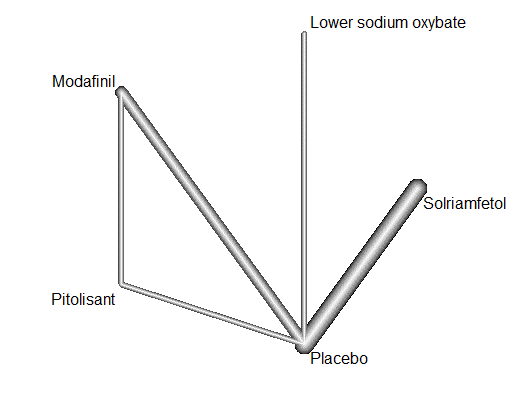


# Irritability

## Pairwise effect size and adjusted standard deviation

|  | Trt 1 | Trt 2 | TE | seTE | seTE.adj |
| --- | --- | --- | --- | --- | --- |
| Dauvilliers 2013 | Pitolisant | Placebo | 1.0664 | 1.6131 | 2.4447 |
| Dauvilliers 2013 | Modafinil | Pitolisant | 0.4493 | 1.0025 | 1.0604 |
| Dauvilliers 2013 | Modafinil | Placebo | 1.5156 | 1.5288 | 1.8666 |
| Ruoff 2016 | Placebo | Solriamfetol | -1.4939 | 1.0986 | 1.0986 |
| Szakacs 2017 | Pitolisant | Placebo | 1.0415 | 1.1381 | 1.1381 |

## Results

### Fixed Model

|  | Trt 1 | Trt 2 | RR |  | 95%-CI | Q | leverage |
| --- | --- | --- | --- | --- | --- | --- | --- |
| Dauvilliers 2013 | Pitolisant | Placebo | 2.8569 | [0.4617; | 17.6786] | 0 | . |
| Dauvilliers 2013 | Modafinil | Pitolisant | 1.5735 | [0.2447; | 10.1188] | 0 | . |
| Dauvilliers 2013 | Modafinil | Placebo | 4.4954 | [0.4632; | 43.6234] | 0 | . |
| Ruoff 2016 | Placebo | Solriamfetol | 0.2245 | [0.0261; | 1.9333] | 0 | 1 |
| Szakacs 2017 | Pitolisant | Placebo | 2.8569 | [0.4617; | 17.6786] | 0 | 0.67 |

### Random Model

|  | Trt 1 | Trt 2 | RR |  | 95%-CI |
| --- | --- | --- | --- | --- | --- |
| Dauvilliers 2013 | Pitolisant | Placebo | 2.8569 | [0.4617; | 17.6786] |
| Dauvilliers 2013 | Modafinil | Pitolisant | 1.5735 | [0.2447; | 10.1188] |
| Dauvilliers 2013 | Modafinil | Placebo | 4.4954 | [0.4632; | 43.6234] |
| Ruoff 2016 | Placebo | Solriamfetol | 0.2245 | [0.0261; | 1.9333] |
| Szakacs 2017 | Pitolisant | Placebo | 2.8569 | [0.4617; | 17.6786] |

## Tests

Number of studies: k = 3

Number of treatments: n = 4

Number of pairwise comparisons: m = 5

Number of designs: d = 3

Quantifying heterogeneity / inconsistency:

tau^2 = 0; tau = 0; I^2 = 0%

Tests of heterogeneity (within designs) and inconsistency (between designs):

|  | Q | df | p-value |
| --- | --- | --- | --- |
| Total | 0 | 1 | 0.9899 |
| Within designs | 0 | 0 | - |
| Between designs | 0 | 1 | 0.9899 |

## Pairwise Comparisons: Fixed-effects model

|  | Modafinil | Pitolisant | Placebo | Solriamfetol |
| --- | --- | --- | --- | --- |
| Modafinil | . | 1.5735 | 4.4954 | 1.0092 |
| Pitolisant | 0.6355 | . | 2.8569 | 0.6413 |
| Placebo | 0.2225 | 0.35 | . | 0.2245 |
| Solriamfetol | 0.9909 | 1.5592 | 4.4545 | . |

### Lower 95%-confidence limit

|  | Modafinil | Pitolisant | Placebo | Solriamfetol |
| --- | --- | --- | --- | --- |
| Modafinil | . | 0.2447 | 0.4632 | 0.0441 |
| Pitolisant | 0.0988 | . | 0.4617 | 0.0382 |
| Placebo | 0.0229 | 0.0566 | . | 0.0261 |
| Solriamfetol | 0.0433 | 0.0928 | 0.5172 | . |

### Upper 95%-confidence limit

|  | Modafinil | Pitolisant | Placebo | Solriamfetol |
| --- | --- | --- | --- | --- |
| Modafinil | . | 10.1188 | 43.6234 | 23.0972 |
| Pitolisant | 4.0867 | . | 17.6786 | 10.7705 |
| Placebo | 2.1587 | 2.166 | . | 1.9333 |
| Solriamfetol | 22.6794 | 26.1855 | 38.3629 | . |

## Pairwise Comparisons: Random-effects model

|  | Modafinil | Pitolisant | Placebo | Solriamfetol |
| --- | --- | --- | --- | --- |
| Modafinil | . | 1.5735 | 4.4954 | 1.0092 |
| Pitolisant | 0.6355 | . | 2.8569 | 0.6413 |
| Placebo | 0.2225 | 0.35 | . | 0.2245 |
| Solriamfetol | 0.9909 | 1.5592 | 4.4545 | . |

### Lower 95%-confidence limit

|  | Modafinil | Pitolisant | Placebo | Solriamfetol |
| --- | --- | --- | --- | --- |
| Modafinil | . | 0.2447 | 0.4632 | 0.0441 |
| Pitolisant | 0.0988 | . | 0.4617 | 0.0382 |
| Placebo | 0.0229 | 0.0566 | . | 0.0261 |
| Solriamfetol | 0.0433 | 0.0928 | 0.5172 | . |

### Upper 95%-confidence limit

|  | Modafinil | Pitolisant | Placebo | Solriamfetol |
| --- | --- | --- | --- | --- |
| Modafinil | . | 10.1188 | 43.6234 | 23.0972 |
| Pitolisant | 4.0867 | . | 17.6786 | 10.7705 |
| Placebo | 2.1587 | 2.166 | . | 1.9333 |
| Solriamfetol | 22.6794 | 26.1855 | 38.3629 | . |

## Pairwise comparison P values

|  | P-score (fixed) | P-score (random) |
| --- | --- | --- |
| Placebo | 0.8954 | 0.8954 |
| Pitolisant | 0.478 | 0.478 |
| Solriamfetol | 0.3227 | 0.3227 |
| Modafinil | 0.3039 | 0.3039 |

## Forest Plot


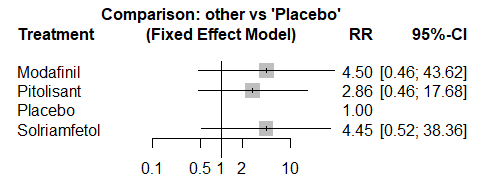


## Network Evidence Graph


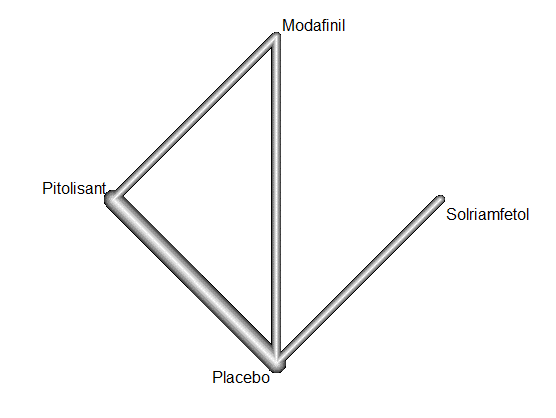


# Nausea

## Pairwise effect size and adjusted standard deviation

|  | Trt 1 | Trt 2 | TE | seTE | seTE.adj |
| --- | --- | --- | --- | --- | --- |
| Harsh J.R 1997 | Modafinil | Placebo | 2.6474 | 1.4304 | 1.4304 |
| US MDF; 1998 | Modafinil | Placebo | 0.9555 | 0.4915 | 0.4915 |
| US MDF 2000 | Modafinil | Placebo | 1.7932 | 0.726 | 0.726 |
| Dauvilliers 2013 | Pitolisant | Placebo | -0.0328 | 0.9666 | 1.0768 |
| Dauvilliers 2013 | Modafinil | Pitolisant | -0.7557 | 1.1989 | 1.5522 |
| Dauvilliers 2013 | Modafinil | Placebo | -0.7885 | 1.1985 | 1.5504 |
| Black 2006 | Placebo | Sodium oxybate | -2.5029 | 1.0234 | 1.086 |
| Black 2006 | Modafinil | Sodium oxybate | -1.9276 | 0.7411 | 0.7625 |
| Black 2006 | Modafinil | Placebo | 0.5754 | 1.2109 | 2.9605 |
| The U.S. Xyrem. 2002 | Placebo | Sodium oxybate | -1.1527 | 0.7165 | 0.7165 |
| Thorpy 2019 | Placebo | Solriamfetol | -1.8458 | 1.0149 | 1.0149 |
| Ruoff 2016 | Placebo | Solriamfetol | -0.8008 | 0.6759 | 0.6759 |
| Bogan 2015 | Placebo | Solriamfetol | -2.1972 | 1.4706 | 1.4706 |
| Szakacs 2017 | Pitolisant | Placebo | 1.8893 | 1.4993 | 1.4993 |

## Results

### Fixed model

|  | Trt1 | Trt2 | RR | 95%-CI | |  | | Q | | leverage | |
| --- | --- | --- | --- | --- | --- | --- | --- | --- | --- | --- | --- |
| Harsh J.R 1997 | Modafinil | Placebo | 2.5685 | [1.3080; | 5.0438] | | 1.42 | | 0.06 | |
| US MDF; 1998 | Modafinil | Placebo | 2.5685 | [1.3080; | 5.0438] | | 0 | | 0.49 | |
| US MDF 2000 | Modafinil | Placebo | 2.5685 | [1.3080; | 5.0438] | | 1.37 | | 0.22 | |
| Dauvilliers 2013 | Pitolisant | Placebo | 2.4133 | [0.5372; | 10.8401] | | 0.72 | | . | |
| Dauvilliers 2013 | Modafinil | Pitolisant | 1.0643 | [0.2195; | 5.1614] | | 0.28 | | . | |
| Dauvilliers 2013 | Modafinil | Placebo | 2.5685 | [1.3080; | 5.0438] | | 1.25 | | . | |
| Black 2006 | Placebo | Sodium oxybate | 0.1274 | [0.0489; | 0.3318] | | 0.17 | | . | |
| Black 2006 | Modafinil | Sodium oxybate | 0.3271 | [0.1189; | 0.9005] | | 1.13 | | . | |
| Black 2006 | Modafinil | Placebo | 2.5685 | [1.3080; | 5.0438] | | 0.02 | | . | |
| The U.S. Xyrem. 2002 | Placebo | Sodium oxybate | 0.1274 | [0.0489; | 0.3318] | | 1.61 | | 0.46 | |
| Thorpy 2019 | Placebo | Solriamfetol | 0.2839 | [0.1014; | 0.7951] | | 0.33 | | 0.27 | |
| Ruoff 2016 | Placebo | Solriamfetol | 0.2839 | [0.1014; | 0.7951] | | 0.46 | | 0.6 | |
| Bogan 2015 | Placebo | Solriamfetol | 0.2839 | [0.1014; | 0.7951] | | 0.41 | | 0.13 | |
| Szakacs 2017 | Pitolisant | Placebo | 2.4133 | [0.5372; | 10.8401] | | 0.45 | | 0.26 | |

### Random model

|  | Trt1 | Trt2 | RR | 95%-CI | |
| --- | --- | --- | --- | --- | --- |
| Harsh J.R 1997 | Modafinil | Placebo | 2.5645 | [1.1508; | 5.7150] |
| US MDF; 1998 | Modafinil | Placebo | 2.5645 | [1.1508; | 5.7150] |
| US MDF 2000 | Modafinil | Placebo | 2.5645 | [1.1508; | 5.7150] |
| Dauvilliers 2013 | Pitolisant | Placebo | 2.5215 | [0.5057; | 12.5711] |
| Dauvilliers 2013 | Modafinil | Pitolisant | 1.0171 | [0.1851; | 5.5894] |
| Dauvilliers 2013 | Modafinil | Placebo | 2.5645 | [1.1508; | 5.7150] |
| Black 2006 | Placebo | Sodium oxybate | 0.1282 | [0.0425; | 0.3862] |
| Black 2006 | Modafinil | Sodium oxybate | 0.3287 | [0.1014; | 1.0655] |
| Black 2006 | Modafinil | Placebo | 2.5645 | [1.1508; | 5.7150] |
| The U.S. Xyrem. 2002 | Placebo | Sodium oxybate | 0.1282 | [0.0425; | 0.3862] |
| Thorpy 2019 | Placebo | Solriamfetol | 0.2688 | [0.0846; | 0.8542] |
| Ruoff 2016 | Placebo | Solriamfetol | 0.2688 | [0.0846; | 0.8542] |
| Bogan 2015 | Placebo | Solriamfetol | 0.2688 | [0.0846; | 0.8542] |
| Szakacs 2017 | Pitolisant | Placebo | 2.5215 | [0.5057; | 12.5711] |

## Tests

| Number of studies: k = 10 |
| --- |
| Number of treatments: n = 5 |
| Number of pairwise comparisons: m = 14 |
| Number of designs: d = 6 |

Quantifying heterogeneity / inconsistency:

tau^2 = 0.1653; tau = 0.4066; I^2 = 16.7% [0.0%; 58.8%]

Tests of heterogeneity (within designs) and inconsistency (between designs):

| Q d.f. p-value |
| --- |
| Total 9.94 9 0.3553 |
| Within designs 5.65 5 0.3417 |
| Between designs 4.29 4 0.3682 |

## Pairwise comparisons-Fixed model

|  | Modafinil | Pitolisant | Placebo | Sodium oxybate | Solriamfetol |
| --- | --- | --- | --- | --- | --- |
| Modafinil | . | 1.0643 | 2.5685 | 0.3271 | 0.7292 |
| Pitolisant | 0.9395 | . | 2.4133 | 0.3074 | 0.6851 |
| Placebo | 0.3893 | 0.4144 | . | 0.1274 | 0.2839 |
| Sodium oxybate | 3.0567 | 3.2534 | 7.8513 | . | 2.2289 |
| Solriamfetol | 1.3714 | 1.4596 | 3.5225 | 0.4487 | . |

### Lower 95% confidence limit

|  | Modafinil | Pitolisant | Placebo | Sodium oxybate | Solriamfetol |
| --- | --- | --- | --- | --- | --- |
| Modafinil | . | 0.2195 | 1.308 | 0.1189 | 0.2129 |
| Pitolisant | 0.1937 | . | 0.5372 | 0.053 | 0.1109 |
| Placebo | 0.1983 | 0.0922 | . | 0.0489 | 0.1014 |
| Sodium oxybate | 1.1105 | 0.5609 | 3.0138 | . | 0.5463 |
| Solriamfetol | 0.4004 | 0.2362 | 1.2578 | 0.11 | . |

### Upper 95% confidence limit

|  | Modafinil | Pitolisant | Placebo | Sodium oxybate | Solriamfetol |
| --- | --- | --- | --- | --- | --- |
| Modafinil | . | 5.1614 | 5.0438 | 0.9005 | 2.4978 |
| Pitolisant | 4.5562 | . | 10.8401 | 1.7827 | 4.2342 |
| Placebo | 0.7645 | 1.8613 | . | 0.3318 | 0.7951 |
| Sodium oxybate | 8.4139 | 18.8694 | 20.4537 | . | 9.0947 |
| Solriamfetol | 4.6977 | 9.021 | 9.8651 | 1.8306 | . |

## Pairwise comparisons-random model

|  | Modafinil | Pitolisant | Placebo | Sodium oxybate | Solriamfetol |
| --- | --- | --- | --- | --- | --- |
| Modafinil | . | 1.0171 | 2.5645 | 0.3287 | 0.6893 |
| Pitolisant | 0.9832 | . | 2.5215 | 0.3232 | 0.6777 |
| Placebo | 0.3899 | 0.3966 | . | 0.1282 | 0.2688 |
| Sodium oxybate | 3.0421 | 3.094 | 7.8015 | . | 2.097 |
| Solriamfetol | 1.4507 | 1.4755 | 3.7204 | 0.4769 | . |

### Lower 95% confidence limit

|  | Modafinil | Pitolisant | Placebo | Sodium oxybate | Solriamfetol |
| --- | --- | --- | --- | --- | --- |
| Modafinil | . | 0.1851 | 1.1508 | 0.1014 | 0.1688 |
| Pitolisant | 0.1789 | . | 0.5057 | 0.0475 | 0.0936 |
| Placebo | 0.175 | 0.0795 | . | 0.0425 | 0.0846 |
| Sodium oxybate | 0.9385 | 0.4545 | 2.5895 | . | 0.4243 |
| Solriamfetol | 0.3553 | 0.2038 | 1.1706 | 0.0965 | . |

### Lower 95% confidence limit

|  | Modafinil | Pitolisant | Placebo | Sodium oxybate | Solriamfetol |
| --- | --- | --- | --- | --- | --- |
| Modafinil | . | 5.5894 | 5.715 | 1.0655 | 2.8144 |
| Pitolisant | 5.4033 | . | 12.5711 | 2.2003 | 4.9057 |
| Placebo | 0.869 | 1.9773 | . | 0.3862 | 0.8542 |
| Sodium oxybate | 9.8604 | 21.0633 | 23.5037 | . | 10.3644 |
| Solriamfetol | 5.923 | 10.6799 | 11.8234 | 2.357 | . |

## P scores

|  | P-score (fixed) | P-score (random) |
| --- | --- | --- |
| Placebo | 0.9659 | 0.9617 |
| Modafinil | 0.5373 | 0.5422 |
| Pitolisant | 0.555 | 0.5408 |
| Solriamfetol | 0.3815 | 0.3708 |
| Sodium oxybate | 0.0604 | 0.0845 |

## Forest plot


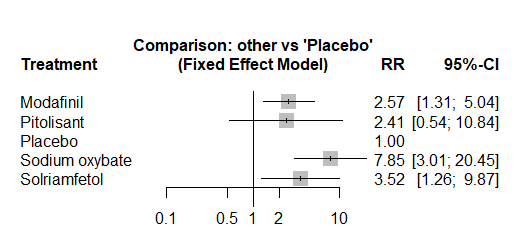


## Network image


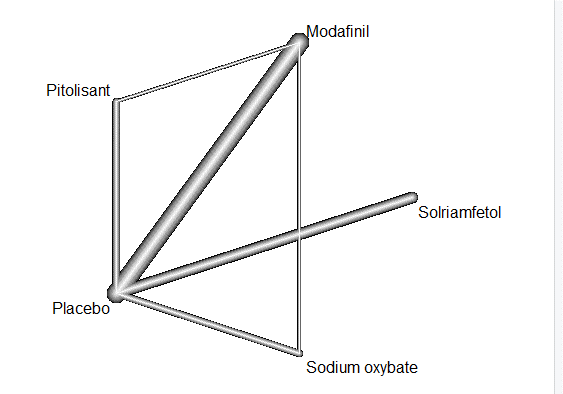


# Dry Mouth

## Pairwise effect size and adjusted standard deviation

|  | Trt 1 | Trt 2 | TE | seTE | seTE.adj |
| --- | --- | --- | --- | --- | --- |
| US MDF 1998 | Modafinil | Placebo | 2.4487 | 1.4379 | 1.4379 |
| Black 2006 | Placebo | Sodium oxybate | 1.0808 | 1.622 | 2.1464 |
| Black 2006 | Modafinil | Sodium oxybate | 0.964 | 1.6226 | 2.1496 |
| Black 2006 | Modafinil | Placebo | -0.1168 | 1.1401 | 1.23 |
| Thorpy 2019 | Placebo | Solriamfetol | -0.7732 | 0.7445 | 0.7445 |

## Results

### Fixed Model

|  | Trt 1 | Trt 2 | RR |  | 95%-CI | Q | leverage |
| --- | --- | --- | --- | --- | --- | --- | --- |
| US MDF 1998 | Modafinil | Placebo | 2.3954 | [0.4159; | 13.7979] | 1.2 | 0.39 |
| Black 2006 | Placebo | Sodium oxybate | 1.7974 | [0.0808; | 40.0022] | 0.05 | . |
| Black 2006 | Modafinil | Sodium oxybate | 4.3054 | [0.1933; | 95.8933] | 0.05 | . |
| Black 2006 | Modafinil | Placebo | 2.3954 | [0.4159; | 13.7979] | 0.65 | . |
| Thorpy 2019 | Placebo | Solriamfetol | 0.4615 | [0.1073; | 1.9859] | 0 | 1 |

### Random Model

|  | Trt 1 | Trt 2 | RR |  | 95%-CI |
| --- | --- | --- | --- | --- | --- |
| US MDF 1998 | Modafinil | Placebo | 2.7631 | [0.2275; | 33.5608] |
| Black 2006 | Placebo | Sodium oxybate | 1.6729 | [0.0346; | 80.9558] |
| Black 2006 | Modafinil | Sodium oxybate | 4.6224 | [0.0955; | 223.8117] |
| Black 2006 | Modafinil | Placebo | 2.7631 | [0.2275; | 33.5608] |
| Thorpy 2019 | Placebo | Solriamfetol | 0.4615 | [0.0259; | 8.2351] |

## Tests

Number of studies: k = 3

Number of treatments: n = 4

Number of pairwise comparisons: m = 5

Number of designs: d = 3

Quantifying heterogeneity / inconsistency:

tau^2 = 1.6072; tau = 1.2678; I^2 = 48.8%

Tests of heterogeneity (within designs) and inconsistency (between designs):

|  | Q | df | p-value |
| --- | --- | --- | --- |
| Total | 1.95 | 1 | 0.1612 |
| Within designs | 0 | 0 | - |
| Between designs | 1.95 | 1 | 0.1612 |

## Pairwise Comparisons: Fixed-effects model

|  | Modafinil | Placebo | Sodium oxybate | Solriamfetol |
| --- | --- | --- | --- | --- |
| Modafinil | . | 2.3954 | 4.3054 | 1.1056 |
| Placebo | 0.4175 | . | 1.7974 | 0.4615 |
| Sodium oxybate | 0.2323 | 0.5564 | . | 0.2568 |
| Solriamfetol | 0.9045 | 2.1667 | 3.8943 | . |

### Lower 95%-confidence limit

|  | Modafinil | Placebo | Sodium oxybate | Solriamfetol |
| --- | --- | --- | --- | --- |
| Modafinil | . | 0.4159 | 0.1933 | 0.1132 |
| Placebo | 0.0725 | . | 0.0808 | 0.1073 |
| Sodium oxybate | 0.0104 | 0.025 | . | 0.0083 |
| Solriamfetol | 0.0926 | 0.5036 | 0.1263 | . |

### Upper 95%-confidence limit

|  | Modafinil | Placebo | Sodium oxybate | Solriamfetol |
| --- | --- | --- | --- | --- |
| Modafinil | . | 13.7979 | 95.8933 | 10.8015 |
| Placebo | 2.4046 | . | 40.0022 | 1.9859 |
| Sodium oxybate | 5.1731 | 12.3827 | . | 7.918 |
| Solriamfetol | 8.8369 | 9.3226 | 120.0799 | . |

## Pairwise Comparisons: Random-effects model

|  | Modafinil | Placebo | Sodium oxybate | Solriamfetol |
| --- | --- | --- | --- | --- |
| Modafinil | . | 2.7631 | 4.6224 | 1.2753 |
| Placebo | 0.3619 | . | 1.6729 | 0.4615 |
| Sodium oxybate | 0.2163 | 0.5978 | . | 0.2759 |
| Solriamfetol | 0.7841 | 2.1667 | 3.6246 | . |

### Lower 95%-confidence limit

|  | Modafinil | Placebo | Sodium oxybate | Solriamfetol |
| --- | --- | --- | --- | --- |
| Modafinil | . | 0.2275 | 0.0955 | 0.0282 |
| Placebo | 0.0298 | . | 0.0346 | 0.0259 |
| Sodium oxybate | 0.0045 | 0.0124 | . | 0.0022 |
| Solriamfetol | 0.0173 | 0.1214 | 0.0289 | . |

### Upper 95%-confidence limit

|  | Modafinil | Placebo | Sodium oxybate | Solriamfetol |
| --- | --- | --- | --- | --- |
| Modafinil | . | 33.5608 | 223.8117 | 57.7499 |
| Placebo | 4.3957 | . | 80.9558 | 8.2351 |
| Sodium oxybate | 10.4748 | 28.9276 | . | 34.6308 |
| Solriamfetol | 35.5086 | 38.6592 | 454.9701 | . |

## Pairwise comparison P values

|  | P-score (fixed) | P-score (random) |
| --- | --- | --- |
| Sodium oxybate | 0.7492 | 0.6941 |
| Placebo | 0.6807 | 0.6285 |
| Solriamfetol | 0.3008 | 0.3833 |
| Modafinil | 0.2693 | 0.2941 |

## Forest Plot


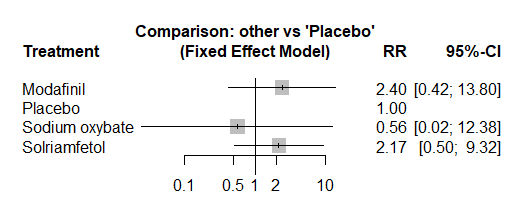


## Network Evidence Graph


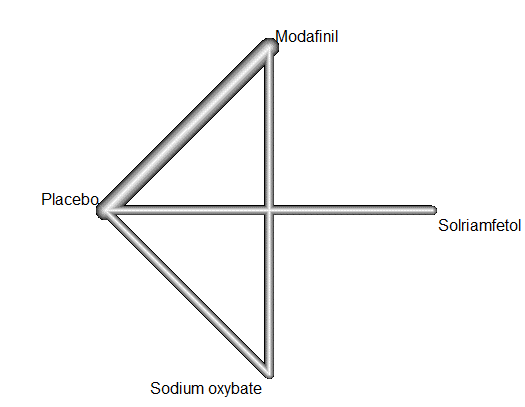


**References**

1. Harsh JR, Hayduk R, Rosenberg R, et al. The efficacy and safety of armodafinil as treatment for adults with excessive sleepiness associated with narcolepsy. Curr Med Res Opin. 2006;22(4):761-774
2. Broughton RJ, Fleming JA, George CF, et al. Randomized, double-blind, placebo-controlled crossover trial of modafinil in the treatment of excessive daytime sleepiness in narcolepsy. Neurology. 1997;49(2):444-451.
3. Randomized trial of modafinil for the treatment of pathological somnolence in narcolepsy. US Modafinil in Narcolepsy Multicenter Study Group. Ann Neurol. 1998;43(1):88-97
4. Randomized trial of modafinil as a treatment for the excessive daytime somnolence of narcolepsy: US Modafinil in Narcolepsy Multicenter Study Group. Neurology. 2000;54(5):1166-1175
5. Billiard M, Besset A, Montplaisir J, et al. Modafinil: a double-blind multicentric study. Sleep. 1994;17(8 Suppl): S107-112
6. Saletu M, Anderer P, Saletu-Zyhlarz GM, Mandl M, Saletu B, Zeitlhofer J. Modafinil improves information processing speed and increases energetic resources for orientation of attention in narcoleptics: double-blind, placebo-controlled ERP studies with low-resolution brain electromagnetic tomography (LORETA). Sleep Med. 2009;10(8):850-858
7. Moldofsky H, Broughton RJ, Hill JD. A randomized trial of the long-term, continued efficacy and safety of modafinil in narcolepsy. Sleep Med. 2000;1(2):109-116
8. Black J, Houghton WC. Sodium oxybate improves excessive daytime sleepiness in narcolepsy. Sleep. 2006;29(7):939-946.
9. US Xyrem® Multicenter Study Group. A randomized, double blind, placebo-controlled multicenter trial comparing the effects of three doses of orally administered sodium oxybate with placebo for the treatment of narcolepsy. Sleep. 2002;25(1):42-49.
10. Xyrem International Study Group. A double-blind, placebo-controlled study demonstrates sodium oxybate is effective for the treatment of excessive daytime sleepiness in narcolepsy. J Clin Sleep Med. 2005;1(4):391-397.
11. Szakacs Z, Dauvilliers Y, Mikhaylov V, et al. Safety and efficacy of pitolisant on cataplexy in patients with narcolepsy: a randomised, double-blind, placebo-controlled trial. Lancet Neurol. 2017;16(3):200-207.
12. Dauvilliers Y, Bassetti C, Lammers GJ, et al. Pitolisant versus placebo or modafinil in patients with narcolepsy: a double-blind, randomised trial. Lancet Neurol. 2013;12(11):1068-1075.
13. Kollb-Sielecka M, Demolis P, Emmerich J, Markey G, Salmonson T, Haas M. The European Medicines Agency review of pitolisant for treatment of narcolepsy: summary of the scientific assessment by the Committee for Medicinal Products for Human Use. Sleep Med. 2017; 33:125-129.
14. Thorpy MJ, Shapiro C, Mayer G, et al. A randomized study of solriamfetol for excessive sleepiness in narcolepsy. Ann Neurol. 2019;85(3):359-370
15. Ruoff C, Swick TJ, Doekel R, et al. Effect of Oral JZP-110 (ADX-N05) on Wakefulness and Sleepiness in Adults with Narcolepsy: A Phase 2b Study. Sleep. 2016;39(7):1379-1387
16. Bogan RK, Feldman N, Emsellem HA, et al. Effect of oral JZP-110 (ADX-N05) treatment on wakefulness and sleepiness in adults with narcolepsy. Sleep Med. 2015;16(9):1102-1108.
17. Bogan RK, Thorpy MJ, Dauvilliers Y, et al. Efficacy and safety of calcium, magnesium, potassium, and sodium oxybates (lower-sodium oxybate [LXB]; JZP-258) in a placebo-controlled, double-blind, randomized withdrawal study in adults with narcolepsy with cataplexy. Sleep. 2021;44(3): zsaa206.
18. Raggi A, Plazzi G, Ferri R. Health-related quality of life in patients with narcolepsy: a review of the literature. J Nerv Ment Dis. 2019 Feb;207(2):84-99.
19. American Academy of Sleep Medicine. International Classification of Sleep Disorders. 3rd ed. Darien, IL: American Academy of Sleep Medicine; 2014.
20. Thorpy MJ. Recently Approved and Upcoming Treatments for Narcolepsy. CNS Drugs. 2020 Jan;34(1):9–27
21. EMA. Xyrem [Internet]. European Medicines Agency. 2018 [cited 2022 Aug 3]. Available from: https://www.ema.europa.eu/en/medicines/human/EPAR/xyrem
22. Pellitteri G, de Biase S, Valente M, Gigli GL. How treatable is narcolepsy with current pharmacotherapy and what does the future hold? Expert Opin Pharmacother. 2021 Aug;22(12):1517–20
23. Alshaikh MK, Tricco AC, Tashkandi M, Mamdani M, Straus SE, BaHammam AS. Sodium oxybate for narcolepsy with cataplexy: systematic review and meta-analysis. J Clin Sleep Med. 2012 Aug 15;8(4):451-8. doi:10.5664/jcsm.2048. PMID: 22893778
24. Lehert P, Falissard B. Multiple treatment comparison in narcolepsy: a network meta-analysis. Sleep. 2018;41(12): zsy185.
25. Lehert P, Szoeke C. Comparison of modafinil and pitolisant in narcolepsy: a non-inferiority meta-analytical approach. Drugs Context. 2020; 9:2020-6-2.
26. Liberati A, Altman DG, Tetzlaff J, Mulrow C, Gøtzsche PC, Ioannidis JPA, et al. The PRISMA statement for reporting systematic reviews and meta-analyses of studies that evaluate health care interventions: explanation and elaboration. PLoS Med. 2009 Jul 21;6(7): e1000100.
27. Rücker G, Schwarzer G. Ranking treatments in frequentist network meta-analysis works without resampling methods. BMC Med Res Methodol. 2015 Jul 31; 15:58.
28. Lehert P, Falissard B. Multiple treatment comparison in narcolepsy: a network meta-analysis. Sleep. 2018 Dec 1;41(12): zsy185.

1. [↑](#footnote-ref-2)
2. [↑](#footnote-ref-3)
